# Supplementary material for: Interdependent Nuclear Co-Trafficking of ASPP1 and p53 Aggravates Cardiac Ischemia/Reperfusion Injury
Source: PubMed Central journal article supplement — Circ Res. 2022 Dec 30;132(2):208–22. doi: 10.1161/CIRCRESAHA.122.321153 (PMC9855749; doi:10.1161/circresaha.122.321153), 2022-12-30

# Figure 1

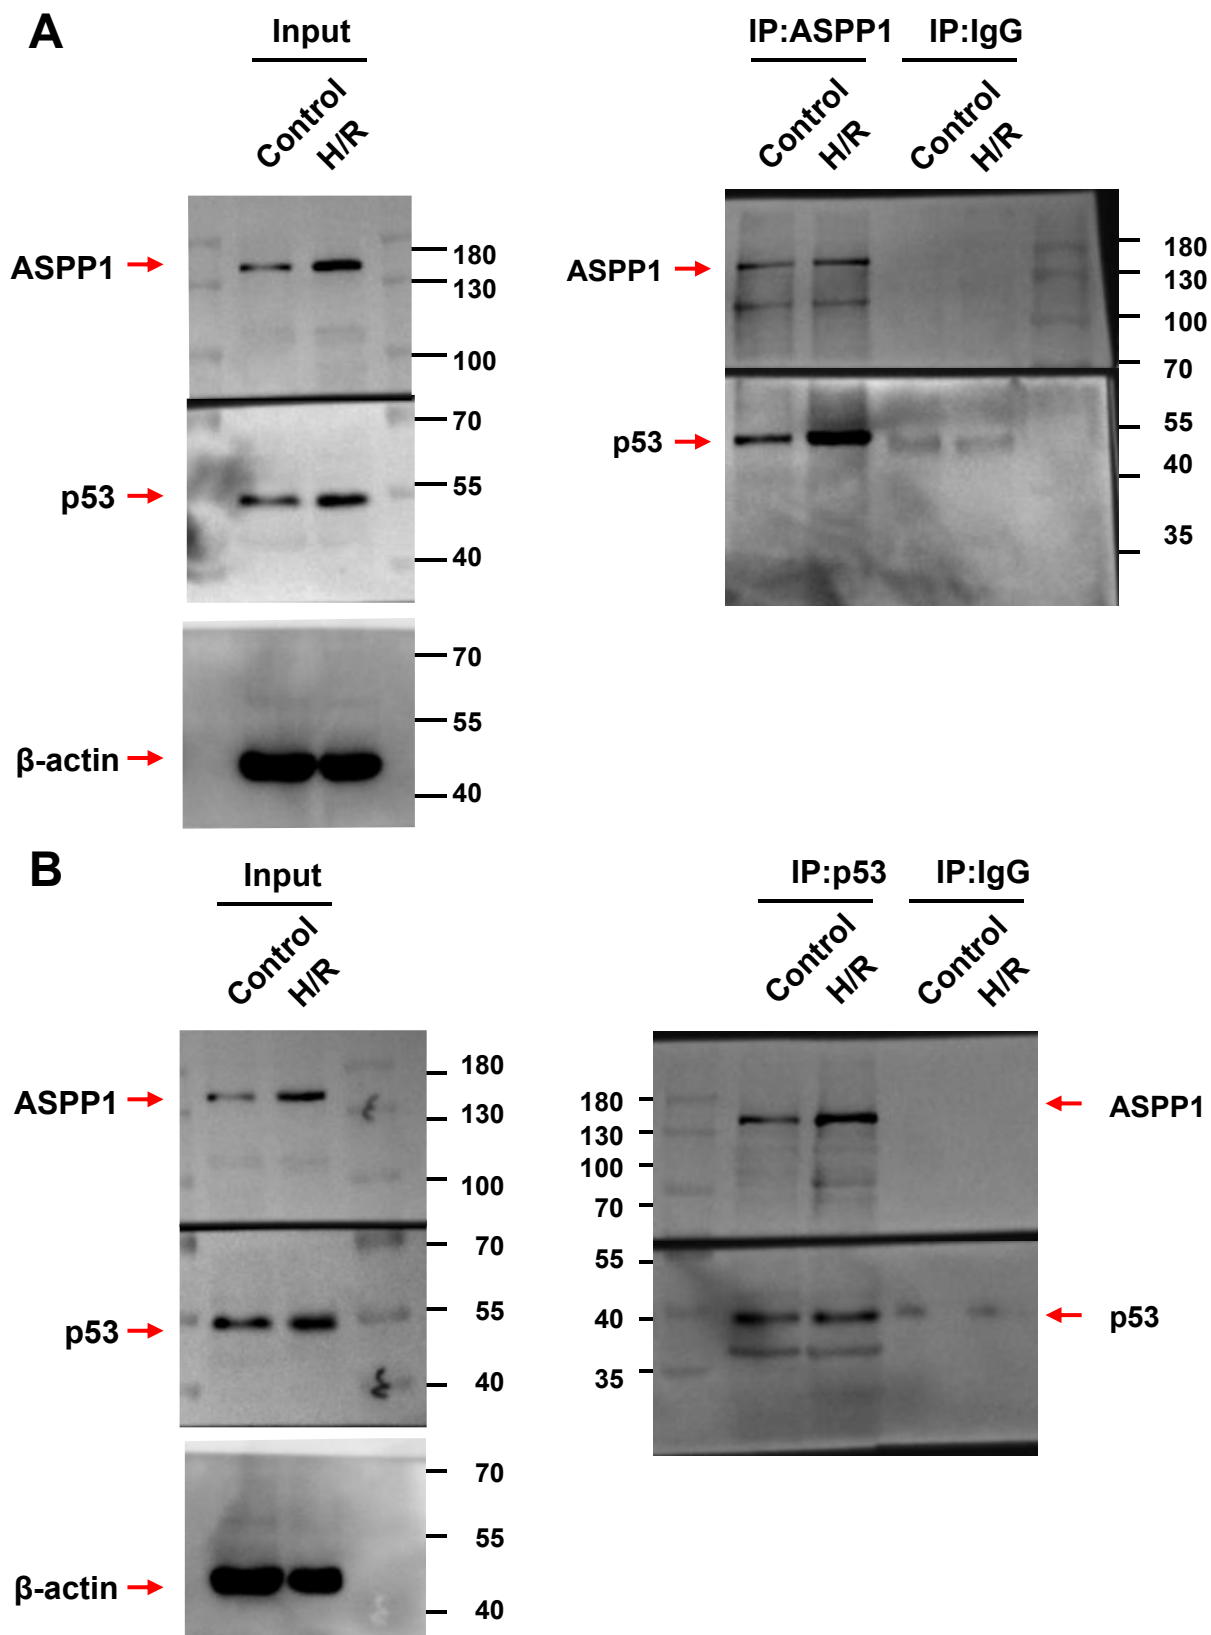

# Figure 2

## A

### Total p53 level

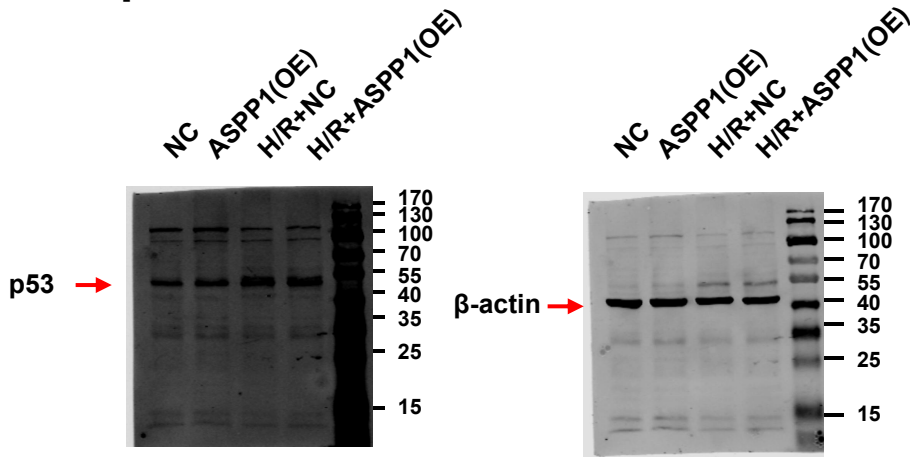

### Nuclear p53 level

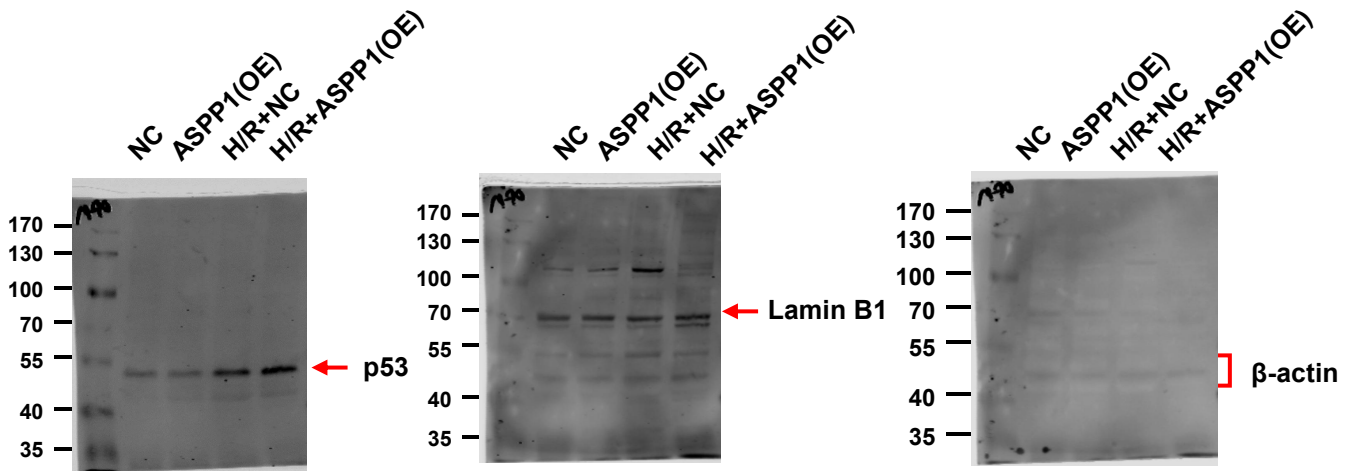

### Cytoplasmic p53 level

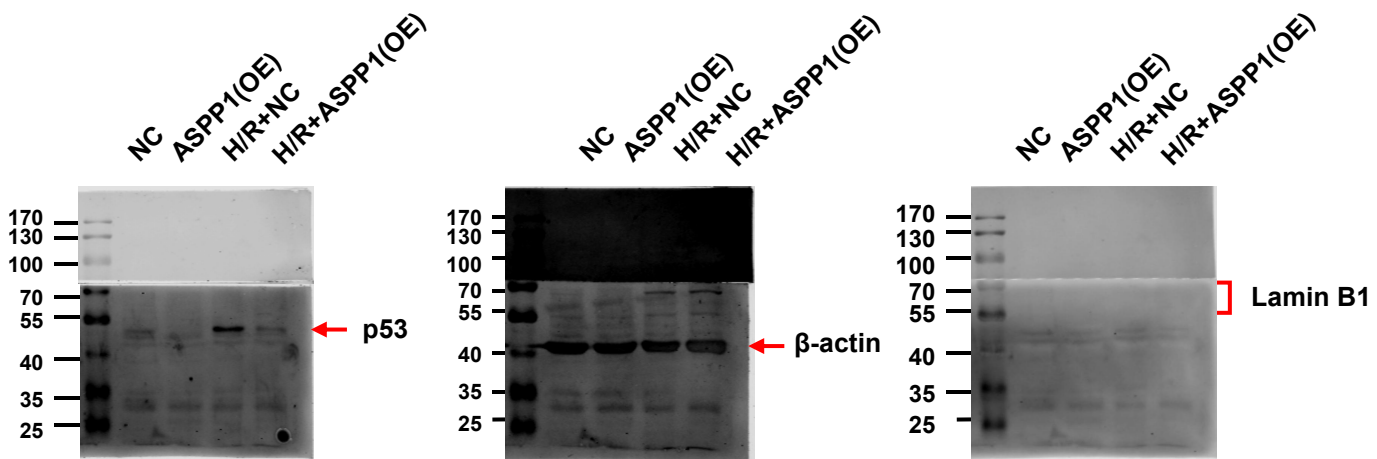

# Figure 2

## B

### Total p53 level

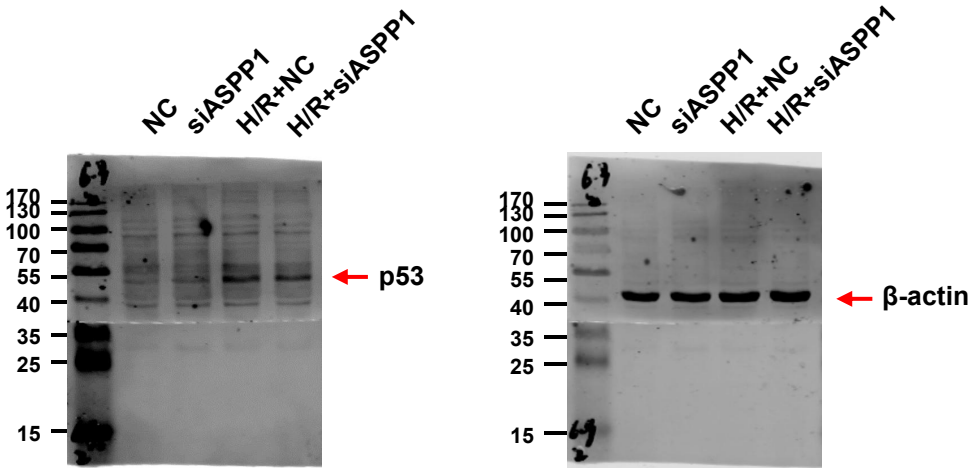

### Nuclear p53 level

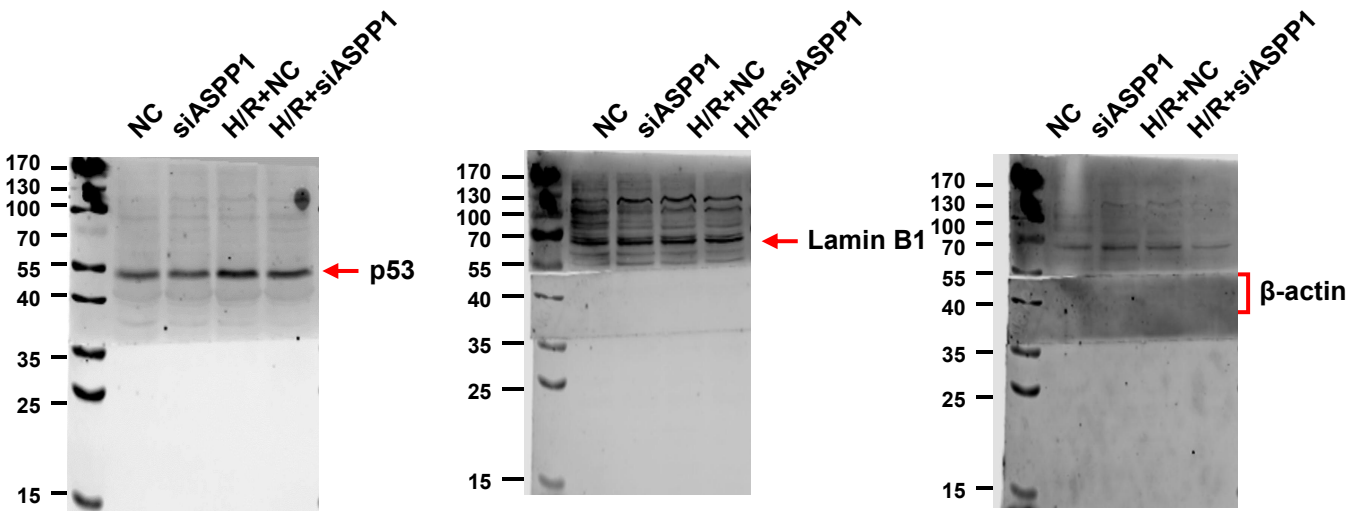

### Cytoplasmic p53 level

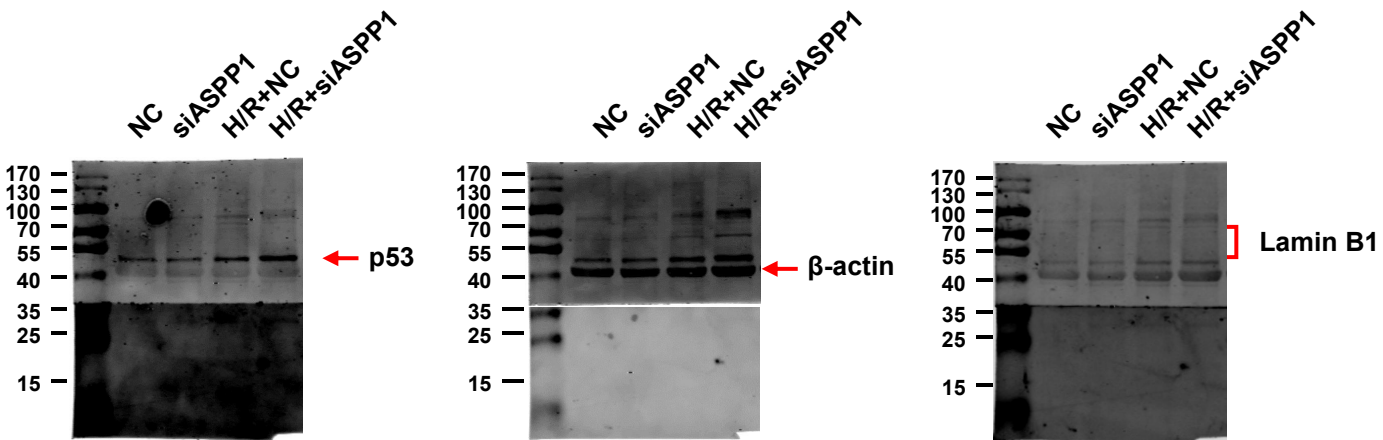

# Figure 3

## A

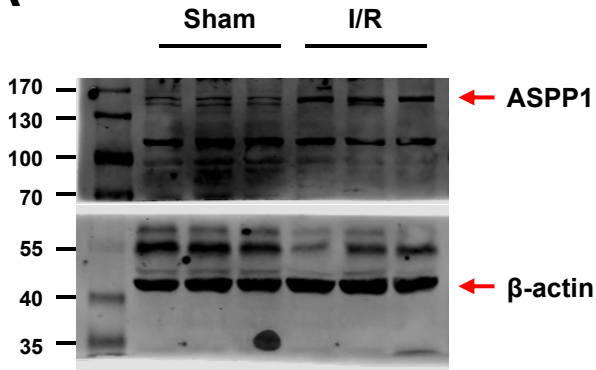

## B

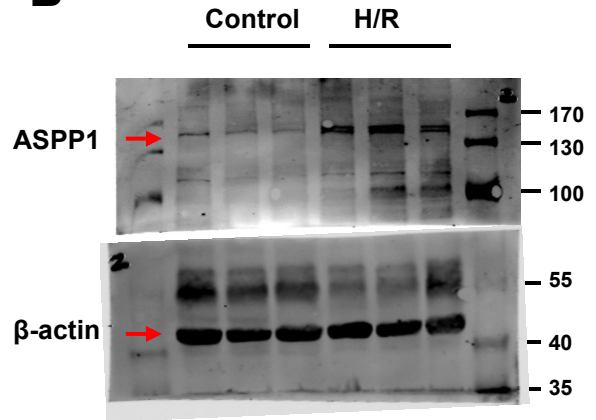

## C

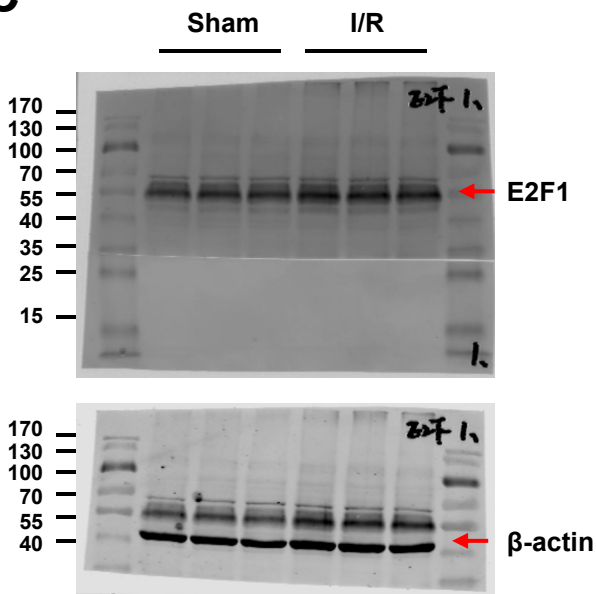

Control H/R

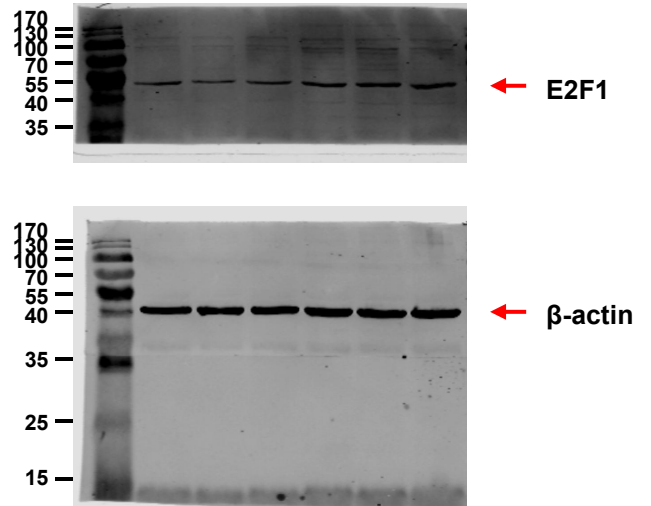

## D

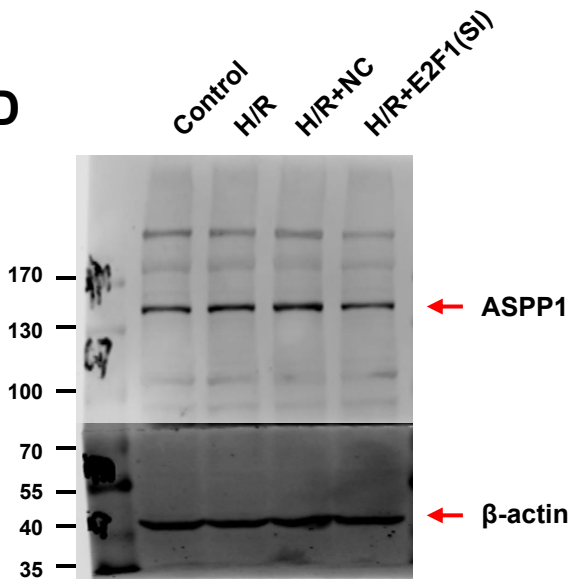

## E

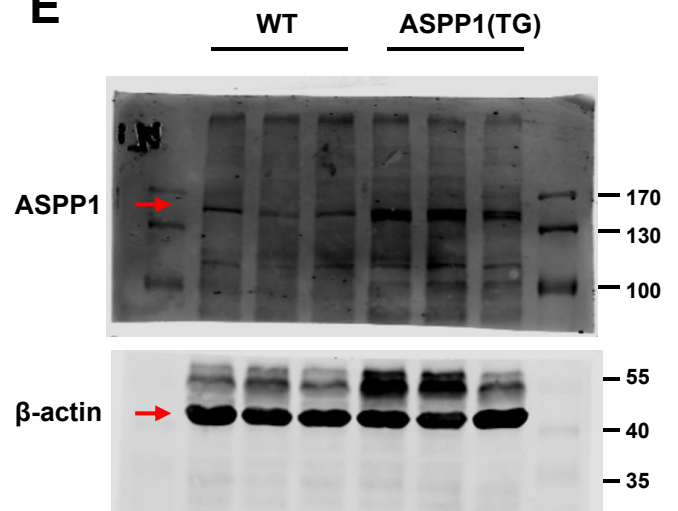

# Figure 3

## J

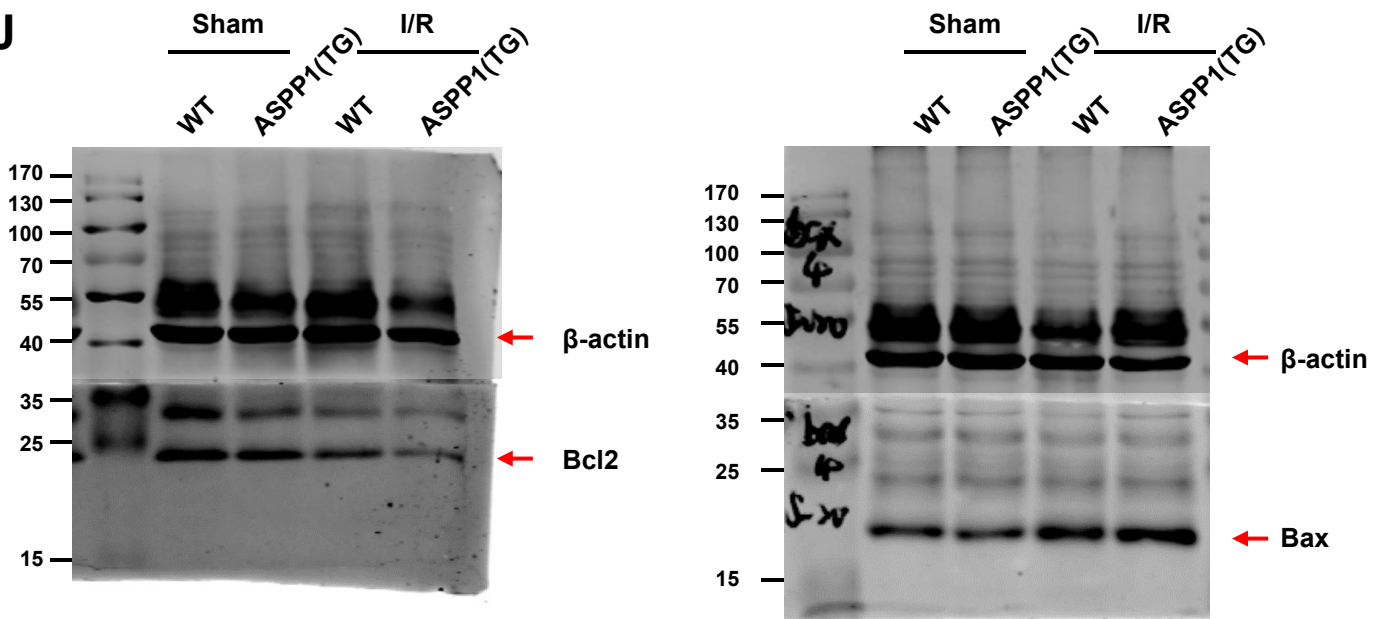

# Figure 4

## A

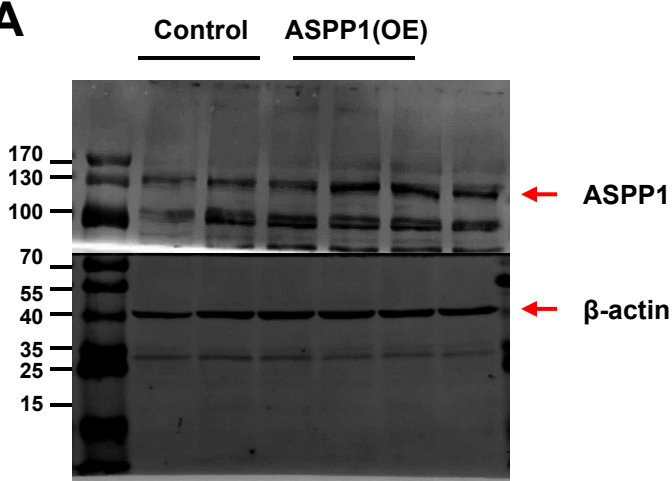

## F

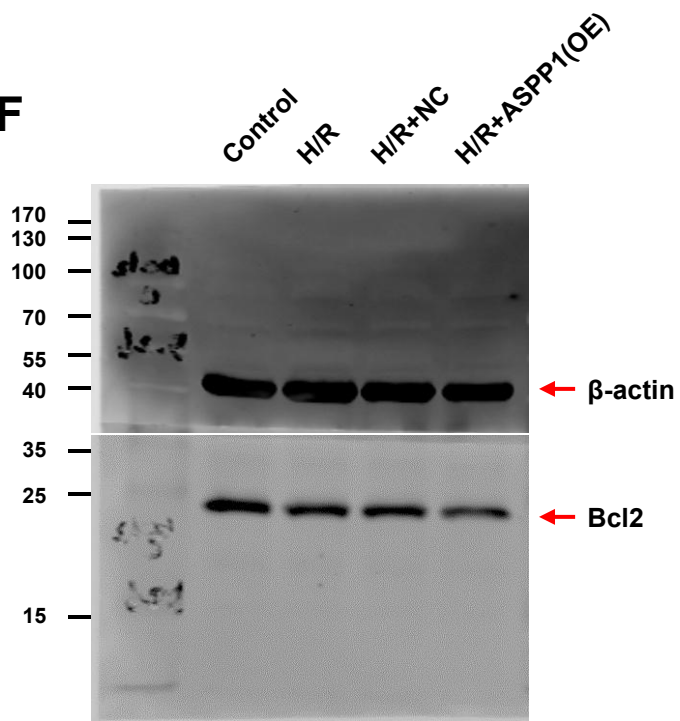

## G

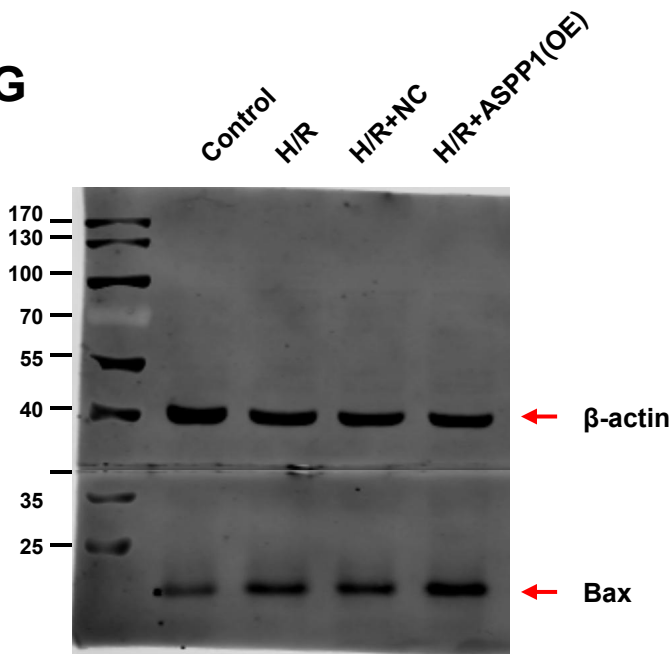

# Figure 5

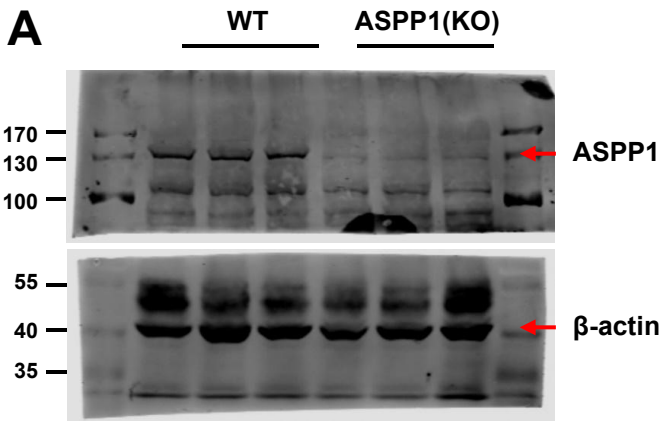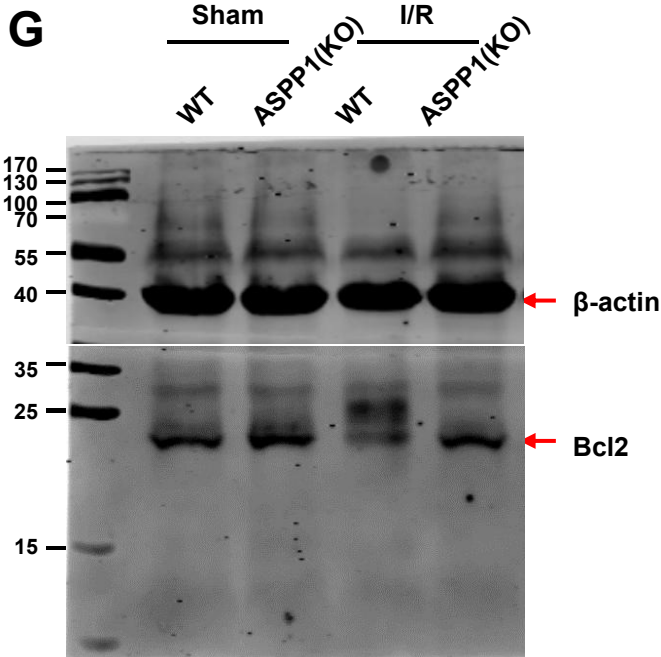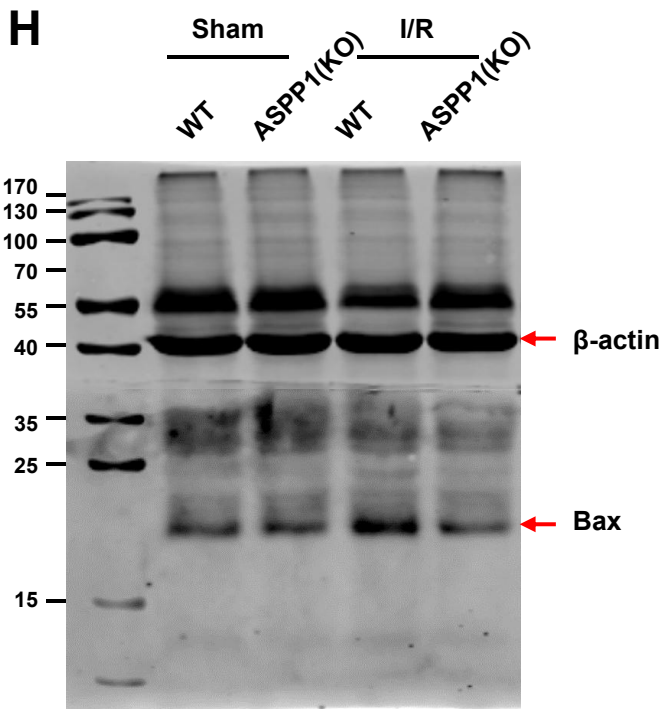

# Figure 6

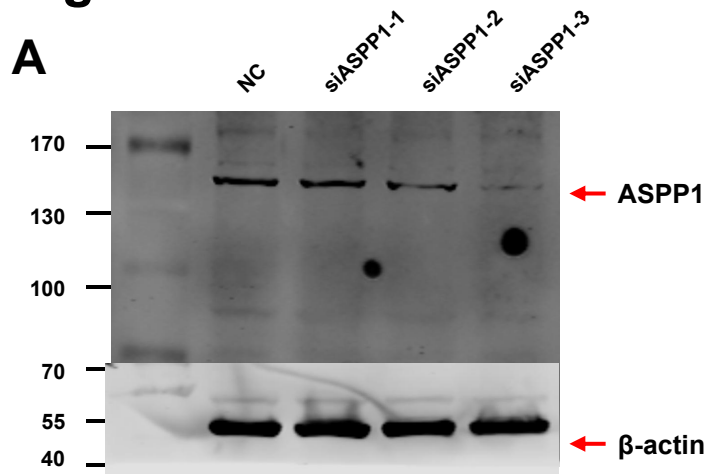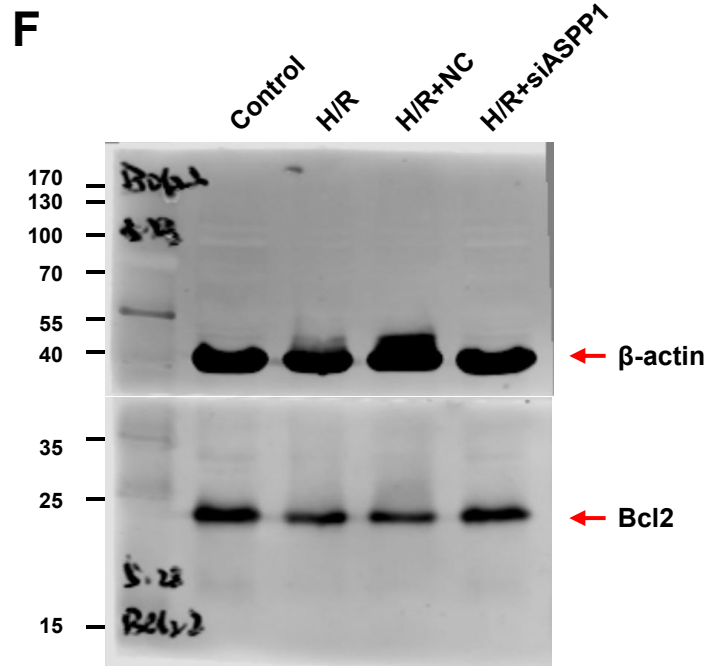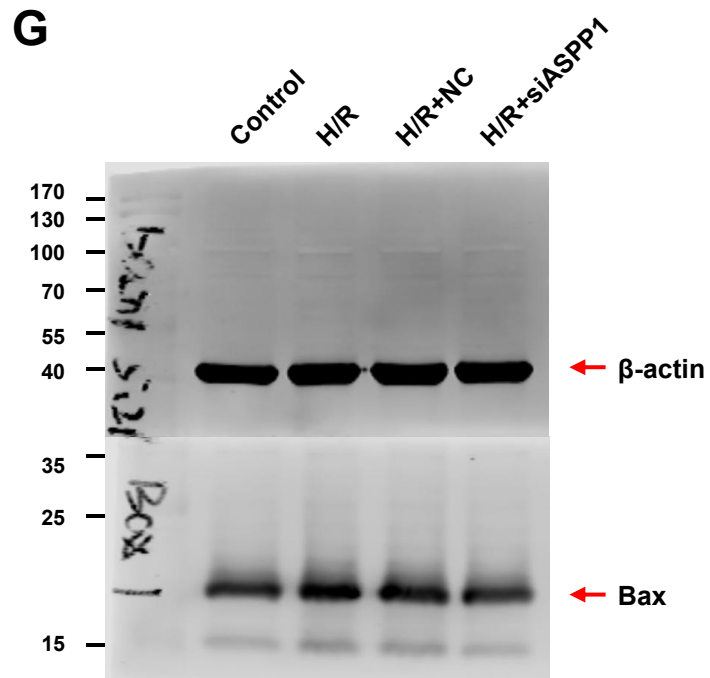

# Figure 7

**A**

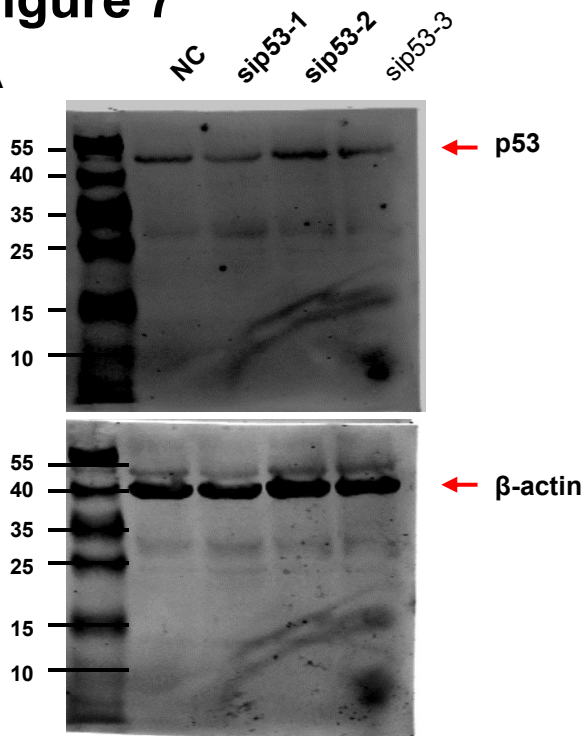

**E**

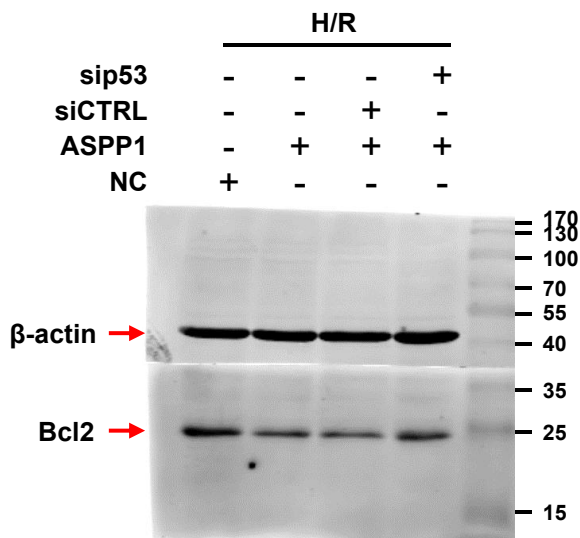

**F**

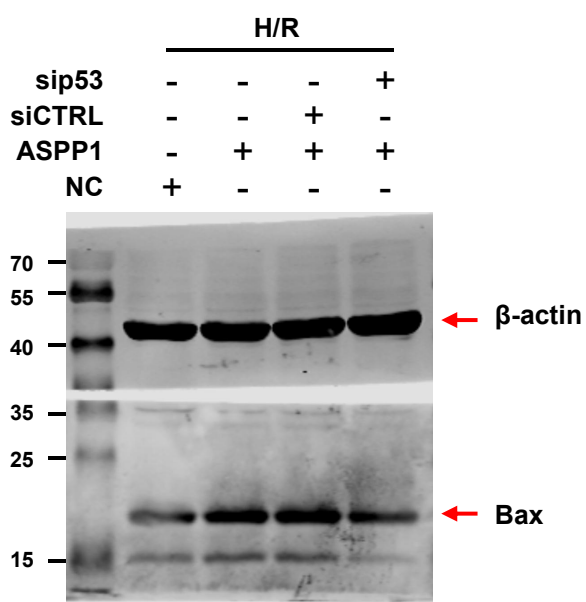

**L**

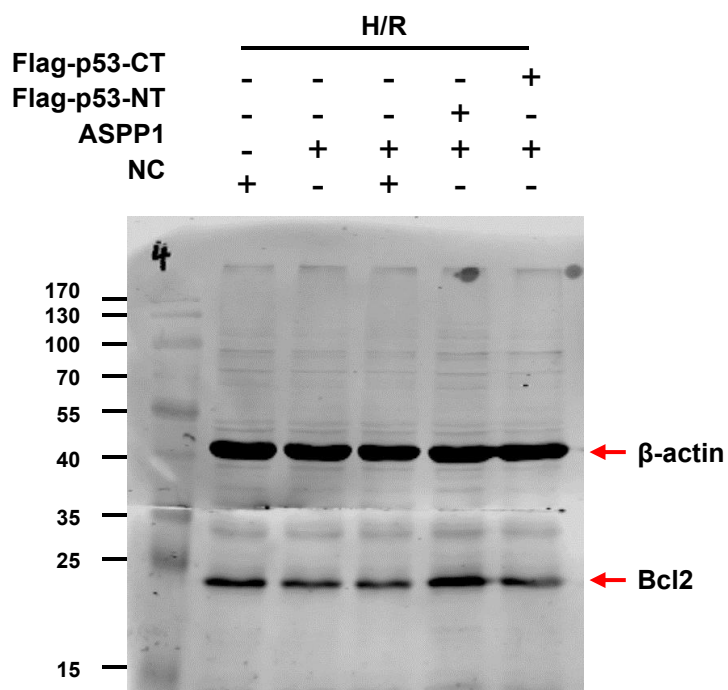

**G**

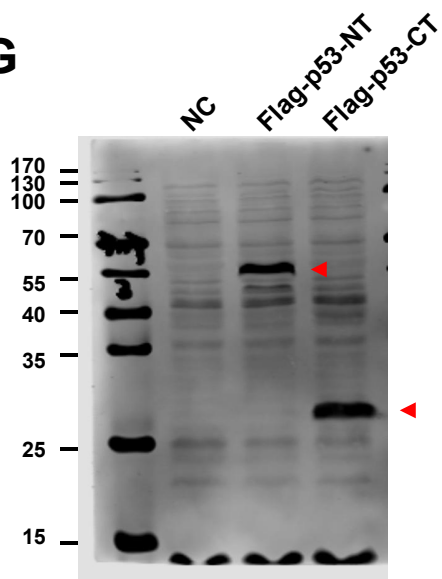

**M**

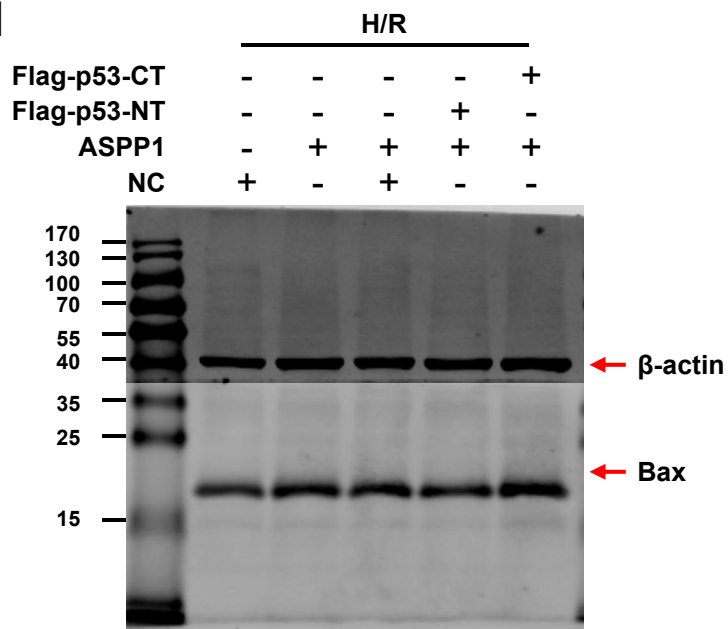

# Figure 8

## A

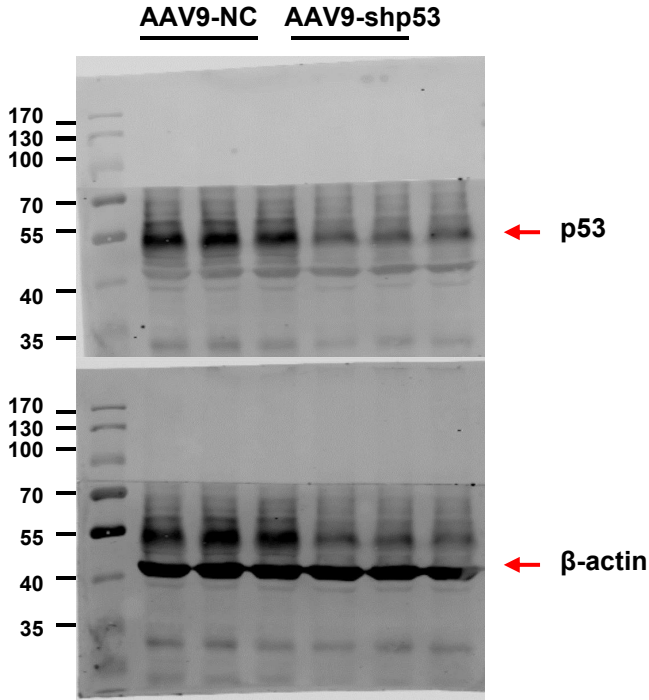

## G

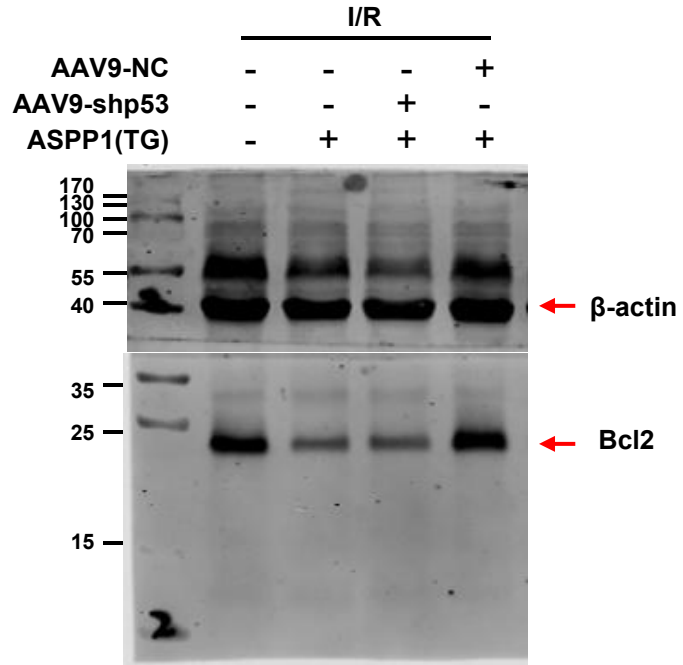

## H

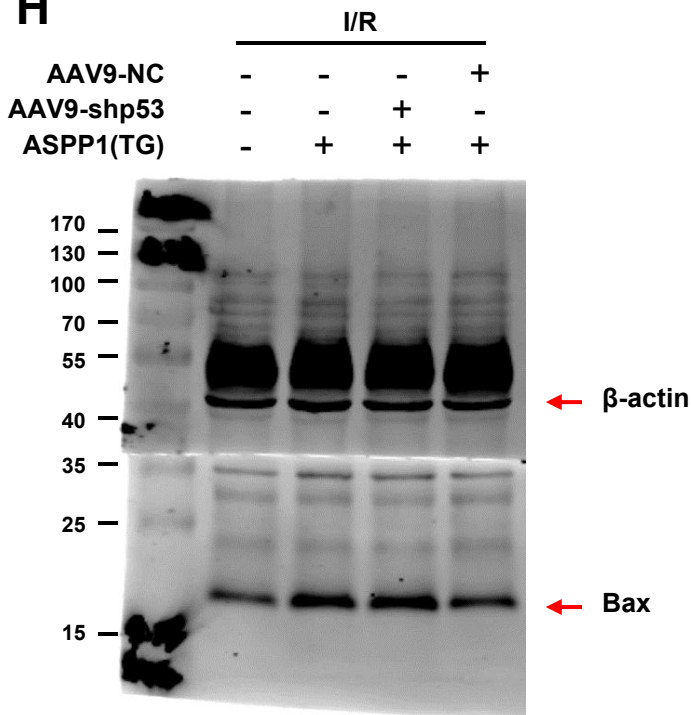



Figure S6

**A**

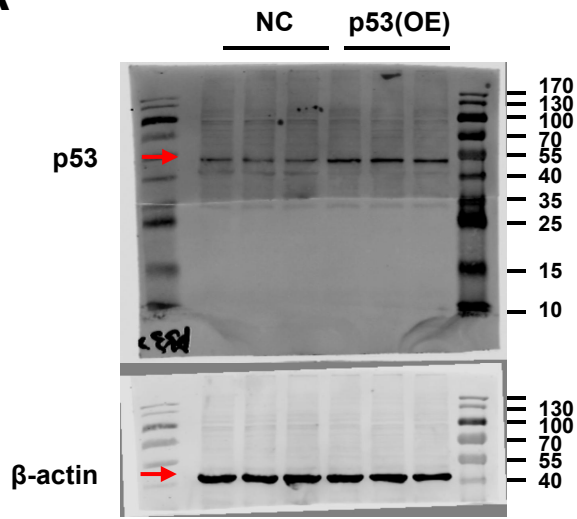

**D**

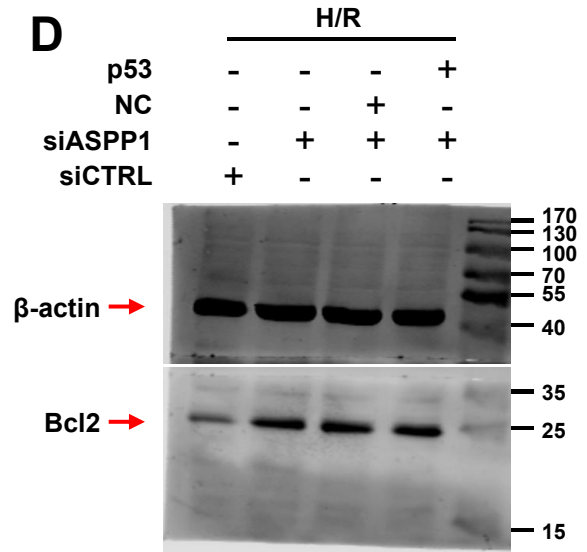

**E**

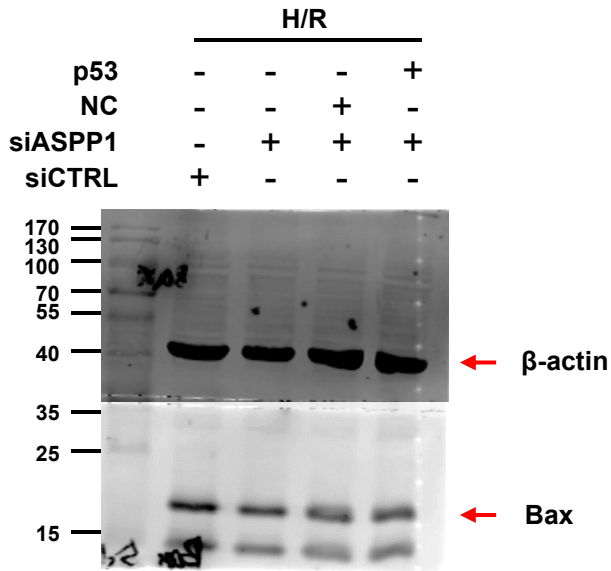

# Figure S7

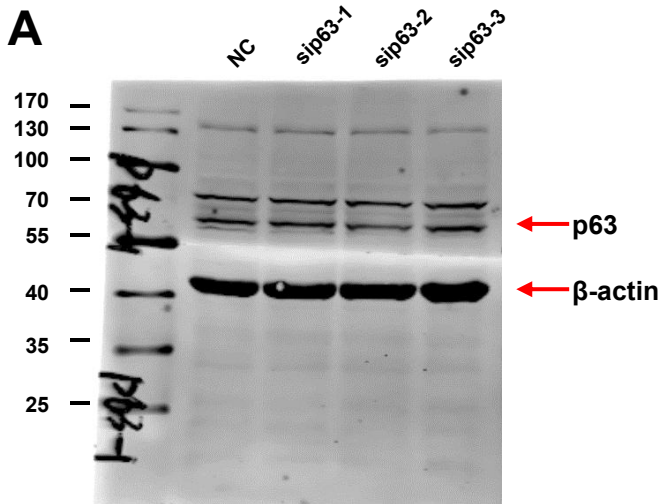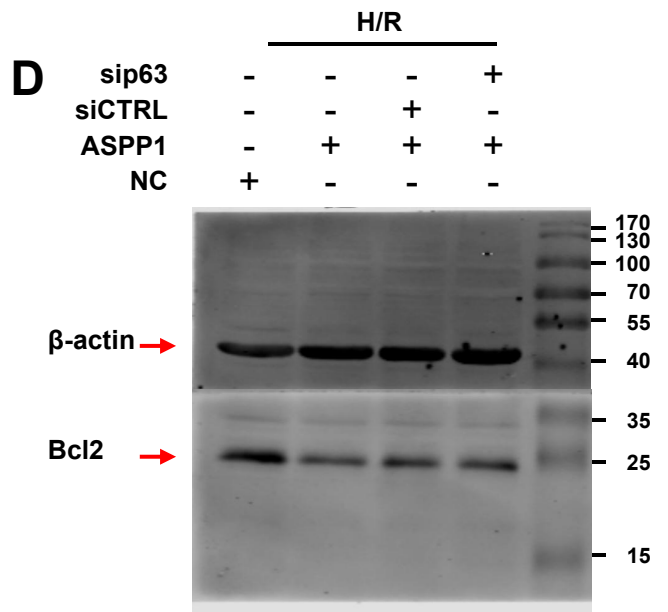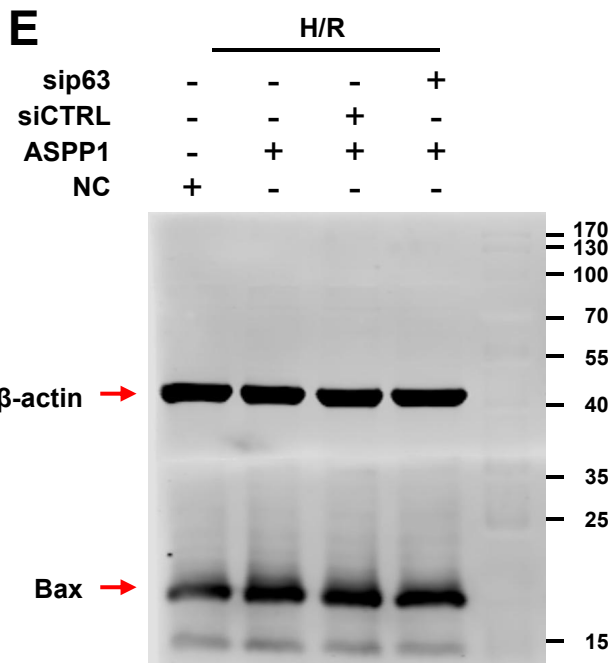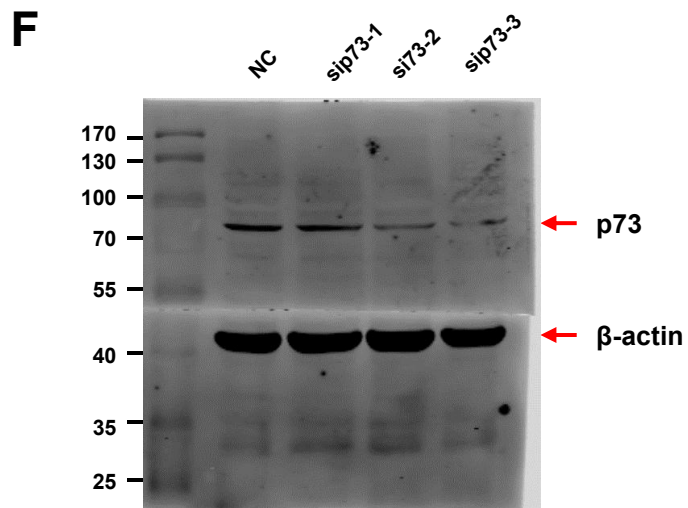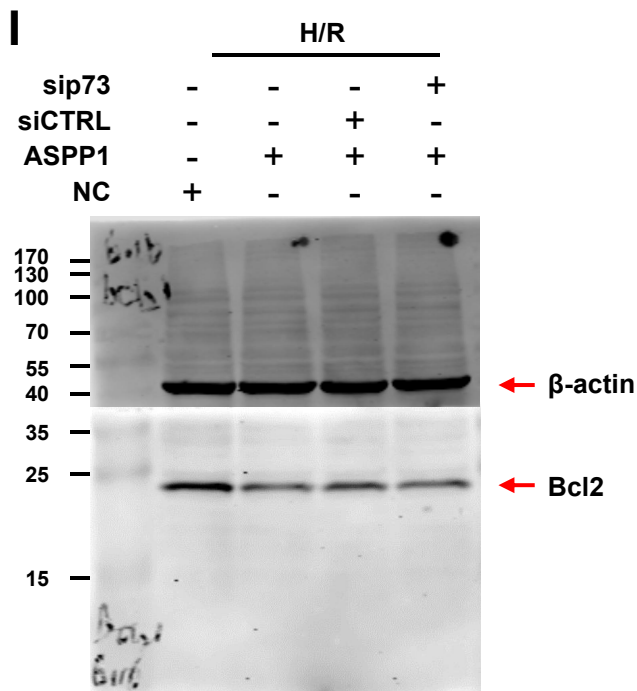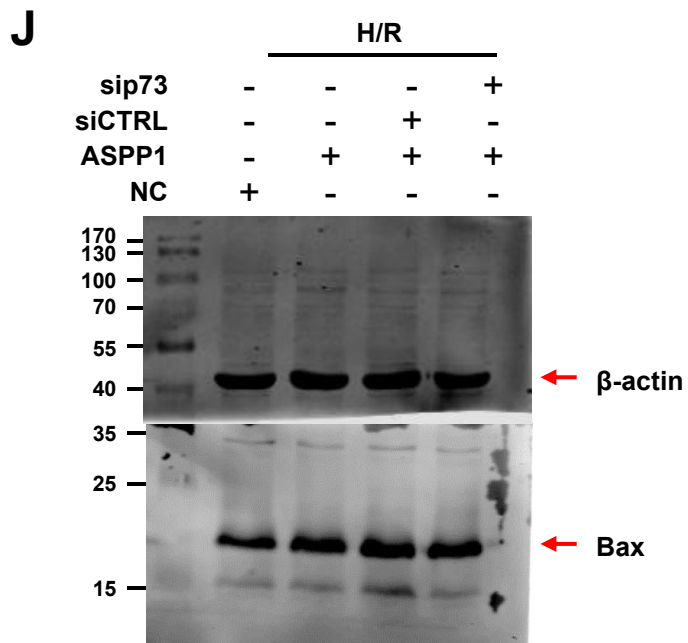

Supplement: res-132-208-s004.pdf [file res-132-208-s004.pdf]
