# Supplementary material for: Interdependent Nuclear Co-Trafficking of ASPP1 and p53 Aggravates Cardiac Ischemia/Reperfusion Injury
Source: PubMed Central journal article supplement — Circ Res. 2022 Dec 30;132(2):208–22. doi: 10.1161/CIRCRESAHA.122.321153 (PMC9855749; doi:10.1161/circresaha.122.321153), 2022-12-30
Supplement: res-132-208-s002.pdf [file res-132-208-s002.pdf]

## Data Supplement

### Interdependent nuclear co-trafficking of ASPP1 and p53 aggravates cardiac ischemia/reperfusion injury

Ying Yang <sup>a, e, 1</sup>, Yang Zhang <sup>a, 1</sup>, Jiqin Yang <sup>a</sup>, Manman Zhang <sup>a</sup>, Tao Tian<sup>a</sup>, Yuan Jiang <sup>a, f</sup>,  
Xuening Liu<sup>a</sup>, Genlong Xue <sup>a</sup>, Xingda Li <sup>a</sup>, Xiaofang Zhang <sup>a</sup>, Shangxuan Li <sup>a</sup>, Xiang Huang <sup>a</sup>,  
Zheng Li <sup>a</sup>, Yang Guo <sup>a</sup>, Lexin Zhao <sup>a</sup>, Hairong Bao <sup>a</sup>, Zhiwen Zhou <sup>a</sup>, Jiahui Song <sup>a</sup>, Guohui  
Yang <sup>a</sup>, Lina Xuan <sup>a</sup>, Hongli Shan <sup>a, d, \*</sup>, Zhiren Zhang<sup>c</sup>, Yanjie Lu <sup>a, \*</sup>, Baofeng Yang <sup>a, \*</sup>,  
Zhenwei Pan <sup>a, b, c, \*</sup>

<sup>a</sup> Department of Pharmacology (State-Province Key Laboratories of Biomedicine-  
Pharmaceutics of China, Key Laboratory of Cardiovascular Research, Ministry of Education),  
College of Pharmacy, Harbin Medical University, Harbin, Heilongjiang 150086, P. R. China;

<sup>b</sup> Research Unit of Noninfectious Chronic Diseases in Frigid Zone, Chinese Academy of  
Medical Sciences, 2019 Research Unit 070, Harbin, Heilongjiang 150086, P. R. China;

<sup>c</sup> NHC Key Laboratory of Cell Transplantation, The First Affiliated Hospital of Harbin Medical  
University, Harbin, Heilongjiang Province, 150001, China;

<sup>d</sup> Shanghai Frontiers Science Research Center for Druggability of Cardiovascular noncoding  
RNA, Institute for Frontier Medical Technology, Shanghai University of Engineering Science,  
Shanghai, 201620, China;

<sup>e</sup> Department of Cardiology, Xiamen Key Laboratory of Cardiac Electrophysiology, Xiamen  
Institute of Cardiovascular Diseases, The First Affiliated Hospital of Xiamen University,

School of Medicine, Xiamen University, Xiamen, 361003, China;

<sup>f</sup> Department of Cardiology, Sun Yat-sen Memorial Hospital, Sun Yat-sen University,

Guangzhou, 510120, China.

## **Methods**

### **Animals**

To avoid the influence of estrogen fluctuations in the female mice, the male mice (C57BL/6 background) (7-8 weeks old, 22-25 g) were used to assure consistence of results in this study<sup>39-41</sup>. All mice were maintained in a temperature-controlled facility with 12 h light/dark cycle at 23±3°C and 30-70% humidity. All animal experiments were approved by the Ethic Committees of College of Pharmacy, Harbin Medical University (IRB3005821) and in accordance with the Guide for the Care and Use of Laboratory in Harbin Medical University. The experimenters were blind to treatment/genotype grouping information during the experiment and quantification. No mice were excluded from the study unless died. Group sizes were determined according to our previous experience with establishment of mouse model of myocardial ischemia and reperfusion<sup>42</sup>. Briefly, the number of mice in each group was determined based on power calculations for the primary parameter (infarct area) with mean differences and standard deviations taken from pilot data at power 80% with a standard level of significance of 0.05.

### **Generation of ASPP1 transgenic mice and knockout mice**

Cardiomyocyte-specific ASPP1 overexpression transgenic (TG) mice and ASPP1 conventional knockout (KO) mice were generated by Cyagen Biosciences Co., Ltd (China). To generate ASPP1(TG) mice, the ASPP1 cDNA was amplified and cloned into a vector containing a murine  $\alpha$ -myosin heavy chain ( $\alpha$ -MHC) promoter. The transgenic expression vector was then injected into mouse fertilized eggs by microinjection. The ASPP1(KO) mice was constructed by CRISPR/Cas9 strategy. Briefly, gRNA1 (matching forward strand of gene: 5'-GAGTTACAGACATGTGGTGCTGG-3'), gRNA2 (matching reverse strand of gene: 5'-TCTAGCTTCTCTGTGGTACAGGG-3') and Cas9 expression plasmids were designed to

delete the second exon of ASPP1. Genomic PCR of tail DNA was performed to detect genotype of offspring of ASPP1(TG) mice (forward: 5' -AGTGATGAACAAAGGCACCG-3', reverse: 5'-AGCCAGAAGTCAGATGCTCAAGG-3') and ASPP1(KO) mice (forward 1: 5'-TGTGGTTCCCCTGTCAAAGG-3', forward 2: 5'-GTTGAACTTAGGAAGGAGATGGC-3', reverse 1: 5'-CGTCCAGAAGAACTGAGCTAAC-3'). All mice were compared with non-transgenic or wild-type gender-matched littermates.

### **Construction of adeno-associated virus (AAV9) carrying p53 shRNA**

To induce cardia-specific knockdown of p53, we commissioned Cyagen Biosciences Co., Ltd (China) to construct the shRNA of p53 (sense: 5'-GGACAGCCAAGUCUGUUAU-3', antisense: 5'-AUAACAGACUUGGCUGUCC-3') packaged by adeno-associated virus (AAV9). The AAV9 virus was injected into 6 weeks old mice through the tail vein at a dose of  $1 \times 10^{10}$  PFU per animal. Two weeks after injection, experimental interventions were carried out.

### **Cardiac ischemia/reperfusion injury**

Cardiac I/R injury was induced by 45 min ischemia, followed by 24 h reperfusion. Briefly, male mice (7-8 weeks old, 22-25 g) were anesthetized with 2% avertin (0.1 ml/10 g) intraperitoneally (i.p.). The anesthetized mice were intubated and ventilated using a rodent ventilator with a tidal volume of 200  $\mu$ l and a frequency of 110 breaths per minute (R415; RWD life science, China). Then, the skin surface of the left chest was disinfected and a thoracotomy through 3, 4 intercostal area was performed to expose the heart. The left anterior descending coronary artery (LAD) was occluded by tying a slipknot with 7-0 silk suture 1-2 mm from the lower edge of the left atrium. After 45 min, the slipknot was released to allow 24 h reperfusion.

For sham group mice, the operation followed the same procedure without ligation.

### **TTC staining**

To determine the infarct size, we excised and sliced the cardiac tissue into 1 mm thick slices. Then rapidly incubated slices in 2% 2,3,5-triphenyltetrazolium chloride (TTC, Solarbio, China) at 37°C. After 15 min of incubation, the reaction was terminated by 4% paraformaldehyde (PFA). The infarct area was determined by stereomicroscope (Zeiss Stemi 508, Germany) and measured by computerized planimetry (Image pro-plus 6.0).

### **Echocardiography**

To determine the cardiac function of mice (7-8 weeks old, 22-25 g), the M-mode echocardiography of heart were acquired by Vevo2100 Imaging System (VisualSonics, Toronto, Canada) equipped with a 10-MHz phased-array transducer. Briefly, after removing the hair from the chest of mice using Nair™ depilatory cream (Church & Dwight Co., Inc., Princeton, NJ, USA), the mice were smeared with medical ultrasonic couplant (Tianjin Yajie Medical Material Co., Ltd., Tianjin, China). Two-dimensional targeted M-mode traces were recorded from the parasternal short-axis view at the level of the mid-papillary muscles and from the parasternal long-axis view at the level of immediately under of the papillary muscle. A minimum of six consecutive cardiac cycles were obtained, and the left ventricular systolic diameter (LVID, s), left ventricular diastolic diameter (LVID, d), left ventricular end diastolic volume (LVEDV), and left ventricular end systolic volume (LVESV) were analyzed based on M-mode recordings. Finally, ejection fraction (EF) was calculated as  $EF = (LVEDV - LVESV) / LVEDV \times 100\%$  and fractional shortening (FS) as  $FS = (LVIDd - LVIDs) / LVIDd \times 100\%$ . The data are presented as the average of measurements of three consecutive beats.

### **Isolation of adult mouse cardiomyocytes**

Adult male mice (7-8 weeks old, 22-25 g) were anesthetized by intraperitoneal injection of 2% avertin (0.1 ml/10g body weight). After 15 minutes, hearts were rapidly separated, and the aorta was cannulated on a constant-flow Langendorff apparatus at 37°C. The heart was digested by perfusion with Tyrode's solution containing Type II collagenase (1 mg/ml), protease (0.02 mg/ml), and bovine serum albumin (BSA, 1mg/ml). Tyrode's solution contained (mM): NaCl 123, KCl 5.4, HEPES 10, NaH<sub>2</sub>PO<sub>4</sub> 0.33, MgCl<sub>2</sub> 1.0, and glucose 10; pH adjusted to 7.4 with NaOH. When the tissue turned softening, perfusion was stopped and the left ventricle was dissected and gently dispersed to obtain isolated cardiomyocytes. To obtain cardiomyocytes from ischemia/reperfusion region, we carefully dissected the free wall of left ventricle experienced ischemia/reperfusion based on the color (pale) and position (below the suture around the coronary artery). The cardiomyocytes were then equilibrated in Tyrode's solution with 200 μM CaCl<sub>2</sub> and 1% BSA. Cardiomyocytes were long rod-shape or rectangular under the microscope. All solutions were gassed with 95% O<sub>2</sub> and 5% CO<sub>2</sub> and warmed to 37±0.5°C.

### **Serum creatine kinase isoenzyme MB detection**

Male mice (7-8 weeks old, 22-25 g) were anesthetized with 2% avertin (0.1 ml/10 g) intraperitoneally (i.p.). After anesthetization, blood was collected from the inferior vena cava and allowed to stand at room temperature for 1h. Then, centrifuged the blood at 1000 g for 20 min to obtain the serum. Serum creatine kinase isoenzyme MB (CKMB) was detected by mouse CKMB Elisa Kit (E-EL-M0355, Elabscience, China) according to the protocol. The finally optical density (OD) was read at 450 nm.

### **Neonatal mouse cardiomyocytes culture and treatment**

Neonatal mice (1-3 days) were used to isolate primary neonatal mouse ventricular cardiomyocytes (NMVCs). Briefly, after the skin surface disinfection with 75% alcohol, mice hearts were collected in the clean bench. Then, ventricular tissues were isolated and digested by 0.25% trypsin (Beyotime, China). The obtained cells were centrifuged at 1500 g for 5 min and resuspended by high glucose DMEM (Biological Industries, Israel) complete medium containing 10% fetal bovine serum (Biological Industries, Israel) and 1% penicillin/streptomycin (Beyotime, China). After 2 h's incubation (5% CO<sub>2</sub>, 95% humidified air, 37°C), NMVCs were isolated and incubated for another 48 h under the same condition. To induce hypoxia/reoxygenation (H/R) injury, NMVCs were incubated with hypoxic condition (5% CO<sub>2</sub>, 95% N<sub>2</sub>, 37°C) for 12 h, followed by common condition (5% CO<sub>2</sub>, 95% humidified air, 37°C) for 24 h.

### **Cell transfection**

ASPP1 cDNA were inserted into GV141 vector with T7 promoter and XhoI/KpnI by Shanghai Genechem Co., Ltd (China). Full length p53, N-terminal (the binding fragment of ASPP1 does not have NLS, 1-288 aa) of p53 and C-terminal (NLS of p53, 310-381 aa) of p53 cDNA were inserted into GV141 vector with T7 promoter and XhoI/KpnI, and were all tagged with flag epitope by Shanghai Genechem Co., Ltd (China). Transfection of plasmids was carried out by mixing with Lipofectamine<sup>TM</sup> 2000 reagent (Invitrogen, America). To induce gene knockdown, small interference RNAs (siRNAs) were designed by Suzhou Genepharma Co., Ltd (China). The sequences of siRNAs for mouse ASPP1 were: 5'-GCAAGAUCAUGAAUGGCAATT-3' and 5'-UUGCCAUUCAUGAUCUUGCTT-3' (siASPP1-1); 5'-GCUGCUGUGGGUCCUUAUATT-3' and 5'-UAUAAGGACCCACAGCAGCTT-3'

(siASPP1-2); 5'-GCAAAGGGCCACCUCCCAUTT-3' and 5'-AUGGGAGGUGGCCCUUUGCTT-3' (siASPP1-3). The sequences of siRNAs for mouse p53 were: 5'-GGACAGCCAAGUCUGUUAUTT-3' and 5'-AUAACAGACUUGGCUGUCCTT-3' (sip53-1); 5'-GACCUAUCCUUACCAUCAUTT-3' and 5'-AUGAUGGUAAGGAUAGGUUCTT-3' (sip53-2); 5'-CCACUUGAUGGAGAGUAUUTT-3' and 5'-AAUACUCUCCAUCAAGUGGTT-3' (sip53-3). The sequences of siRNAs for mouse ASPP2 were: 5'-GGACUAUACCCAAGAAUUATT-3' and 5'-UAAUUCUUGGGUAUAGUCCTT-3'. The sequences of siRNAs for mouse iASPP were: 5'-GCAUGGGACUGAUGCACTT-3' and 5'-GUGCAUCAGUCCCAUGCTT-3'. The sequences of siRNAs for mouse importin-β1 were: 5'-GGGAAGUCAAGAACUAUGUTT-3' and 5'-ACAUAGUUCUUGACUUCCTT-3'. The sequences of siRNAs for mouse E2F1 were: 5'-AUCUGACCACCAAACGCUUTT-3' and 5'-AAGCGUUUGGUGGUCAGAUTT-3'. The sequences of siRNAs for mouse p63 were: 5'-CACAGACCACGCACAGAAUTT-3' and 5'-AUUCUGUGCGUGGUCUGUGTT-3' (sip63-1); 5'-AGAUGUUGCUGAAGAUCAATT-3' and 5'-UUGAUCUUCAGCAACAUCUTT-3' (sip63-2); 5'-CAGUAUGUAGAAGAUCUATT-3' and 5'-UAGGAUCUUCUACAUCUGTT (sip63-3); The sequences of siRNAs for mouse p73 were: 5'-GGAACAGAAUUUACCACCATT-3' and 5'-UGGUGGUAAAUUCUGUUCCTT-3' (sip73-1); 5'-GCCUUUGGUUGACUCCUAUTT-3' and 5'-AUAGGAGUCAACCAAAGGCTT-3' (sip73-2); 5'-GCAUCUACCACCUGCAGAATT-3' and 5'-UUCUGCAGGUGGUAGAUGCTT-3' (sip73-3). The sequences of negative control (NC)/siRNA of control (siCTRL) were: 5'-UUCUCCGAACGUGUCACGUTT-3' and 5'-



ACGUGACACGUUCGGAGAATT-3'. Transfection of siRNAs was performed by mixing with X-treme gene siRNA transfection reagent (Roche, Switzerland). Efficiency of small interfering RNA (siRNA) for ASPP2, iASPP, importin- $\beta$ 1 and E2F1 were shown in **Supplementary Figure 8**.

#### **Serum lactate dehydrogenase detection**

Serum lactate dehydrogenase (LDH) was determined by LDH Detection Kit (A020-1 Nanjing Jiancheng Bioengineering Institute, China) according to the manufacturer's instructions. For in vitro assay, LDH levels of culture medium and cell lysates were detected. Relative cell death was calculated based on the ratio of released LDH into the medium. The finally OD of reaction was read at 450 nm.

#### **TUNEL staining**

The apoptosis of cells was determined by TUNEL assay (11684817910, Roche, Switzerland). The cells were fixed with 4% PFA at room temperature. After 1 h of fixation, blocking solution (3% H<sub>2</sub>O<sub>2</sub>: CH<sub>3</sub>OH = 1: 9) was added and allowed to stand at room temperature for 10 min. To permeate the membrane of cells, permeabilization buffer (0.1% Triton X-100, 0.1% sodium citrate) was added and allowed to stand for 4 min at 4°C. The cells were then incubated with 50  $\mu$ l TUNEL reaction mixture for 1 h at 37°C without light. Finally, nuclei were labeled with 4,6-diamidino-2-phenylindole (DAPI) (Beyotime, China) for 15 min at room temperature without light. Photos were taken using a laser scanning confocal microscope (Handbuch LSM 880, Carl Zeiss, Germany).

#### **JC-1 staining**

Mitochondrial membrane potential ( $\Delta\psi_m$ ) was detected by Mitochondrial Membrane Potential

Assay Kit with JC-1 (Beyotime, China). To label the cells, 250  $\mu$ l DMEM medium and 250  $\mu$ L of JC-1 staining working solution (50  $\mu$ l JC1 200 $\times$  in 8 ml ddH<sub>2</sub>O) were added and incubated at 37°C for 20 min. After incubation, cells were washed twice with pre-cooled JC-1 staining buffer (1 $\times$ ). Photos were taken using a laser scanning confocal microscope (Handbuch LSM 880, Carl Zeiss, Germany).

### **Caspase-3 activity assay**

Caspase-3 activity assay Kit (ab39383, Abcam, America) were used to examine caspase-3 activity of cardiac tissues according to the manufacturer's instructions. Briefly, heart tissues were incubated with 50  $\mu$ l lysis buffer on ice for 10 min, and then were add with 50  $\mu$ l 2 $\times$ reaction buffer (containing 10 mM DTT). DEVD-AFC substrate (5  $\mu$ l, 1 mM) was mixed with each sample and allowed to stand at 37°C for 1-2 h. Samples were read in a fluorometer equipped with a 400-nm excitation filter and 505 nm emission filter.

Caspase-3 activity assay kit (5723, Cell Signaling Technology, America) was used to determine caspase-3 activity of cultured cardiomyocytes. Briefly, cells were incubated with lysis buffer on ice for 5 min, followed by 20 times of 3 s ultrasound/6 s pause cycle ultrasonication. Samples were obtained by centrifugation (10 min, 13000 g) at 4°C and then incubated with 20  $\mu$ l substrate buffer at 37°C for 1-2 h without light. The samples were read in a fluorometer equipped with a 380 nm excitation filter and 460 nm emission filter.

### **Western blot**

To obtain the total protein, tissue or cultured cells were lysed in RIPA buffer (Beyotime, China) containing 1% protease inhibitor (Roche, Switzerland) for 1 h in an ice bath. Protein samples were obtained by centrifugation (20 min, 13000 g) at 4°C. The samples were determined and

quantified by BCA Protein Assay Kit (Beyotime, China). Then, protein samples (80  $\mu$ g each) were separated by sodium dodecyl sulfate-polyacrylamide gel electrophoresis (SDS-PAGE) (7.5% - 12%) and transferred to nitrocellulose membranes. After 2 h of blocking in 5% milk, the nitrocellulose membranes were incubated with primary antibodies overnight at 4°C. After washing with PBST (0.05% Tween in phosphate-buffered saline), the membranes were incubated with the secondary anti-rabbit or anti-mouse (1:10000, LI-COR, Lincoln, USA) polyclonal antibody at room temperature for 50 min without light. The membranes were scanned and analyzed by Odyssey infrared scanning system (LI-COR, American).  $\beta$ -actin was used as an internal control. The antibodies used were ASPP1 (1:1000, A4355, Sigma, America), p53 (1:1000, 2524S, Cell Signaling Technology, America), Bcl2 (1:1000, 3498S, Cell Signaling Technology, America), Bax (1:5000, 60267-1-Ig, Proteintech, America), E2F1 (1:1000, A2067, ABclonal, China), Flag tag (1:500, 8146S, Cell Signaling Technology, America), p63 (1:500, A19652, ABclonal, China), p73 (1:500, A2670, ABclonal, China), and  $\beta$ -actin (1:5000, 66009-1-Ig, Proteintech, America).

### **Co-immunoprecipitation**

To determine the interaction between proteins, Pierce<sup>TM</sup> CO-Immunoprecipitation Kit (Thermo fisher, America) was used. Cultured cells were lysed in lysis buffer containing 1% protease inhibitor (Roche, Switzerland) for 20 min in an ice bath. Protein samples were obtained by centrifugation (15 min, 13000 g) at 4°C. After incubated with control agarose resin for 1 h at a 4°C table concentrator, the final protein samples were obtained by centrifugation (1 min, 1000 g) at 4°C. The antibodies (10  $\mu$ g) were pretreated by incubating with AminoLink Plus coupling resin for 1 h at room temperature, and then added to protein samples and incubate overnight at

4°C. After 3 times washing, co-immunoprecipitation products were obtained with elution buffer. The co-immunoprecipitation products were analyzed by Western blot. The antibodies used for co-immunoprecipitation were ASPP1 (HPA006394, Sigma-Aldrich, America) and p53 (A19585, ABclonal, China).

### **Real-time quantitative PCR**

Total RNA samples of tissues and cells were extracted by TRIzol reagent (Invitrogen, Carlsbad, America). RNA samples were reverse transcribed using the Trans-Script All-in-one First-strand cDNA Synthesis Supermix for qPCR Kit (TransGen Biotech, China). Real-time quantitative PCR (qRT-PCR) was performed by SYBR Green Master (Roche, Switzerland). The relative RNA level was analyzed by using  $2^{-\Delta\Delta ct}$  method, and  $\beta$ -actin was used as an internal control. The primer pairs were synthesized by Invitrogen and listed in **Table S6**.

### **Immunostaining**

Cells were fixed with 4% PFA for 15 min at room temperature. Then, 0.5% Triton X-100 was added and allowed to stand for 1 h at room temperature. After 2 h of blocking with 10% normal goat serum at 37°C, cells were incubated with or without (negative control) primary antibodies overnight at 4°C. After washing with PBS, cells were incubated with the secondary antibody at room temperature for 1 h without light, successively. Finally, nuclei were labeled with DAPI (Beyotime, China) for 15 min at room temperature without light. Photos were taken using a laser scanning confocal microscope (Handbuch LSM 880, Carl Zeiss, Germany). The antibodies used for immunostaining assay were: ASPP1 (1:100, HPA006394, Sigma-Aldrich, America) followed by DyLight 488 (anti-rabbit) (1:1000, 35552, Thermo Fisher, America); p53 (1:100, AF1355, R&D, America) followed by DyLight 594 (anti-goat)

(1:500, A23430, AmyJet, China); ASPP2 (1:50, sc-53861, Santa, America), iASPP (1:50, sc-398566, Santa, America) and Flag tag (1:500, 8146S, Cell Signaling Technology, America) followed by DyLight 488 (anti-mouse) (1:1000, 35502, Thermo Fisher, America). p63 (1:50, sc-25268, Santa, America), p73 (1:50, sc-56190, Santa, America) followed by DyLight 594 (anti-mouse) (1:1000, 35510, Thermo Fisher, America). The fluorescent secondary antibody only (negative control) was used to validate antibody specificity and distinguish genuine target staining from background as presented in **Supplemental Figure 9**.

### **Statistical analysis**

All statistical calculations were performed using Prism software (version 8.3.0, GraphPad, America). Data are expressed as mean  $\pm$  SD. In data statistics, all data sets were tested for normality by D'Agostino & Pearson test ( $n \geq 8$ ) and Shapiro-Wilk test ( $n < 8$ ). For normally distributed data, two-tailed Student's *t* test was used to compare two groups; one-way analysis of variance (ANOVA) followed by Tukey's post-hoc multi-comparison test was used to compare differences among multiple groups; statistical analyses comparing two genotypes (WT and ASPP1(TG) or WT and ASPP1(KO)), two manipulations (sham and I/R) was done using a two-way analysis of variance (ANOVA) followed by Tukey's post-hoc multi-comparison test. For non-normally distributed or small sample size ( $n < 6$ ) data, the Mann-Whitney test (two-tailed) was used for two groups, and Kruskal-Wallis, followed by false discovery rate (FDR) method of Benjamini and Hochberg test was used for multiple groups. A value of  $P < 0.05$  was considered statistically significant. No experiment-wide/across-test multiple test correction was applied and only within-test corrections were made. The representative image was selected from one of the repeated experiments that best matched the

mean value. Detailed statistical analysis information including normalization procedures, precise  $P$  values, sample sizes, and named statistical tests is described in **Supplementary Table 7 and 8** in the Supplementary Materials.

## Supplementary Figures

### Supplementary Figure 1

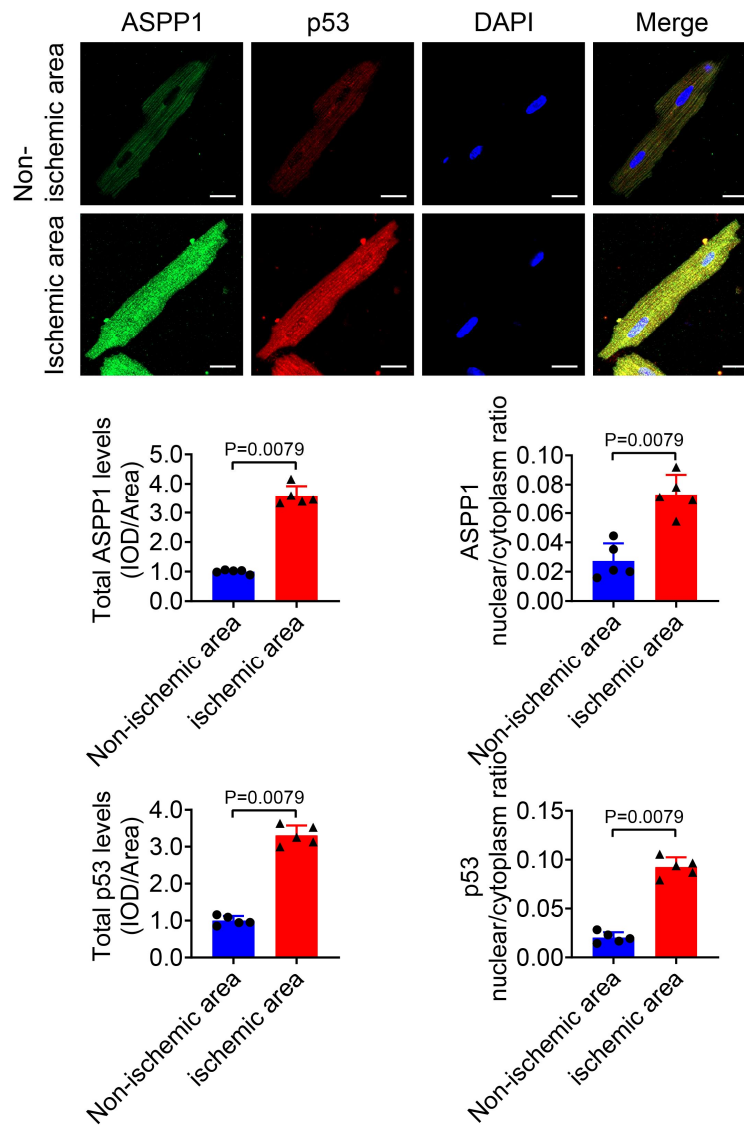

**Supplementary Figure 1.** Immunostaining assay was used to analyze the co-localization of ASPP1 and p53 in isolated adult cardiomyocytes of non-ischemic area and ischemic area from I/R mice (Mann-Whitney *U* test). *n* = 5. Scale bar = 20  $\mu$ m.

## Supplementary Figure 2

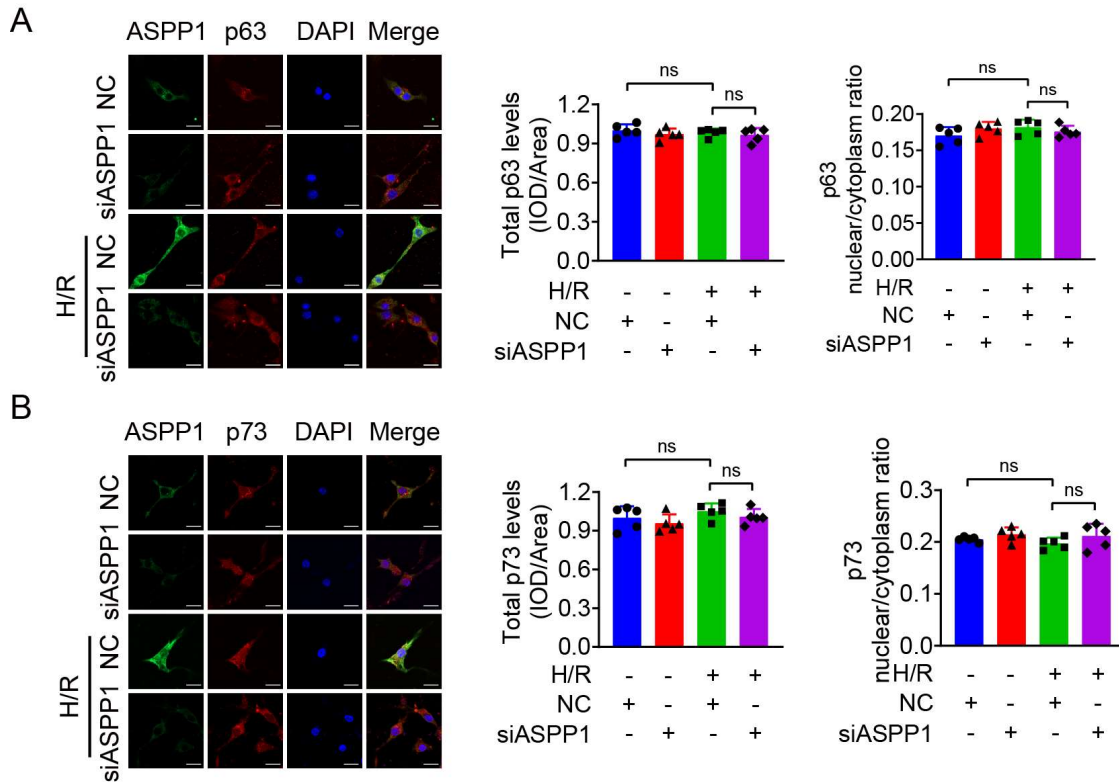

**Supplementary Figure 2. The effects of ASPP1 knockdown on p63 (A) and p73 (B) nuclear translocation in NMVCs by immunostaining** (Kruskal-Wallis, followed by false discovery rate (FDR) method of Benjamini and Hochberg test).  $n = 5$ . Scale bar = 20  $\mu\text{m}$ . ns, not significant.



### Supplementary Figure 3

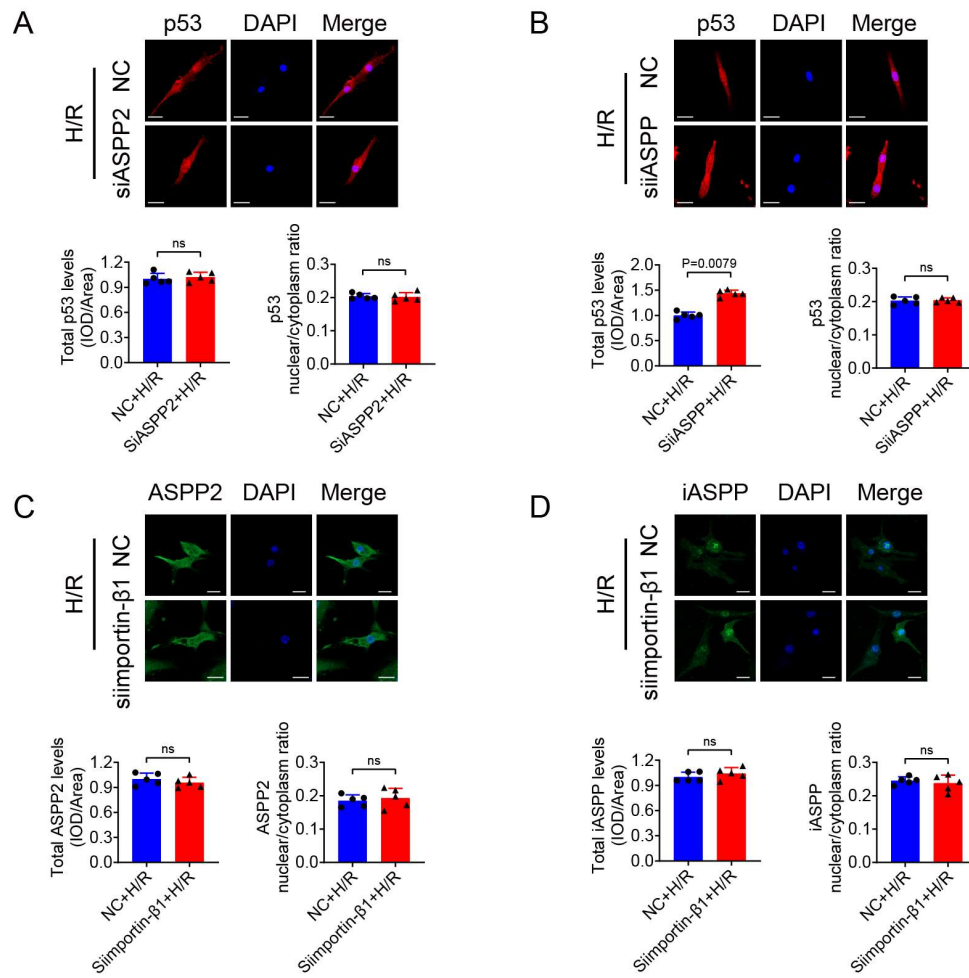

**Supplementary Figure 3. The nuclear translocation of ASPP2 or iASPP is not coupled with p53.** (A, B) Immunostaining was performed to analyze the effect of knockdown of ASPP2 and iASPP on p53 nuclear translocation in NMVCs (Mann-Whitney *U* test). *n* = 5. Scale bar = 20  $\mu$ m. ns, not significant. (C, D) Effect of importin- $\beta$ 1 knockdown on ASPP2 and iASPP nuclear translocation in NMVCs (Mann-Whitney *U* test). *n* = 5. Scale bar = 20  $\mu$ m. ns, not significant.

**Supplementary Figure 4**

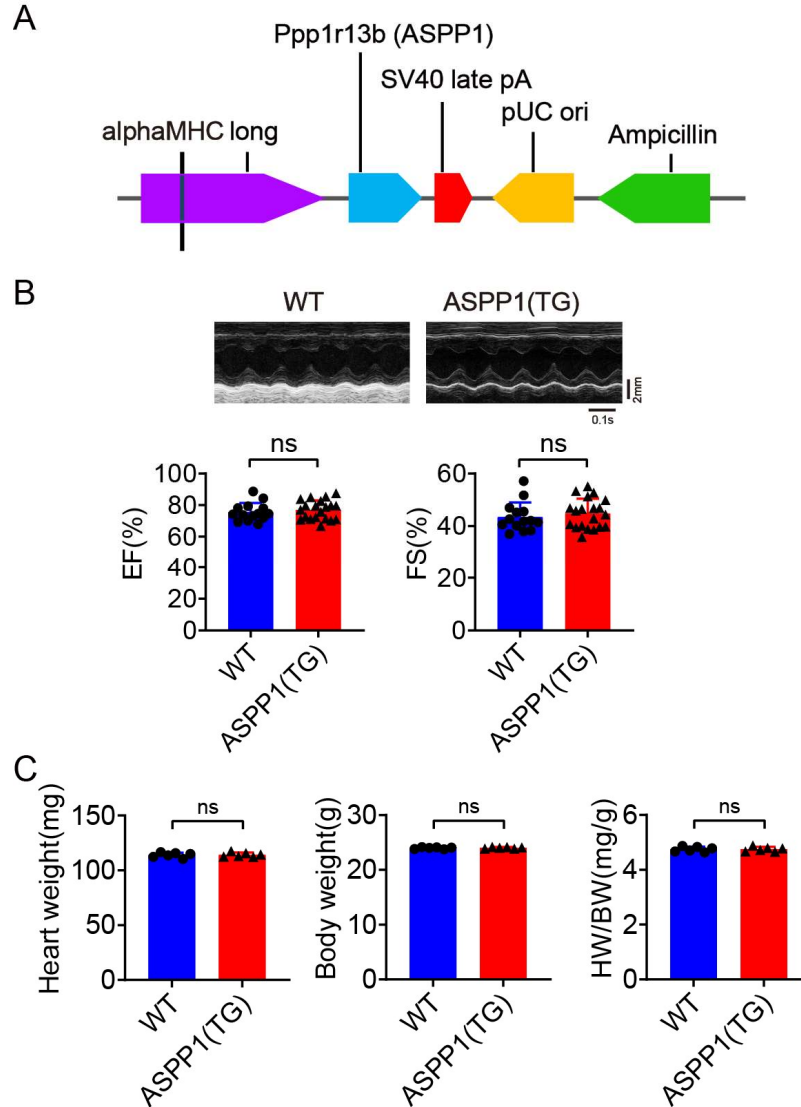

**Supplementary Figure 4. Generation of ASPP1 transgenic overexpression mice.** (A) Strategy for the generation of cardiomyocyte-specific ASPP1 overexpression transgenic mice. (B) Cardiac function of wild type (WT) and ASPP1 transgenic (TG) mice by echocardiography (EF, Student *t* test; FS, Mann-Whitney *U* test). *n* = 14 for WT, *n* = 20 for ASPP1 (TG) mice. ns, not significant. (C) Base line heart weight, body weight, and heart weight/body weight (HW/BW) of WT and ASPP1 (TG) mice (Student *t* test). *n* = 6. ns, not significant.

**Supplementary Figure 5**

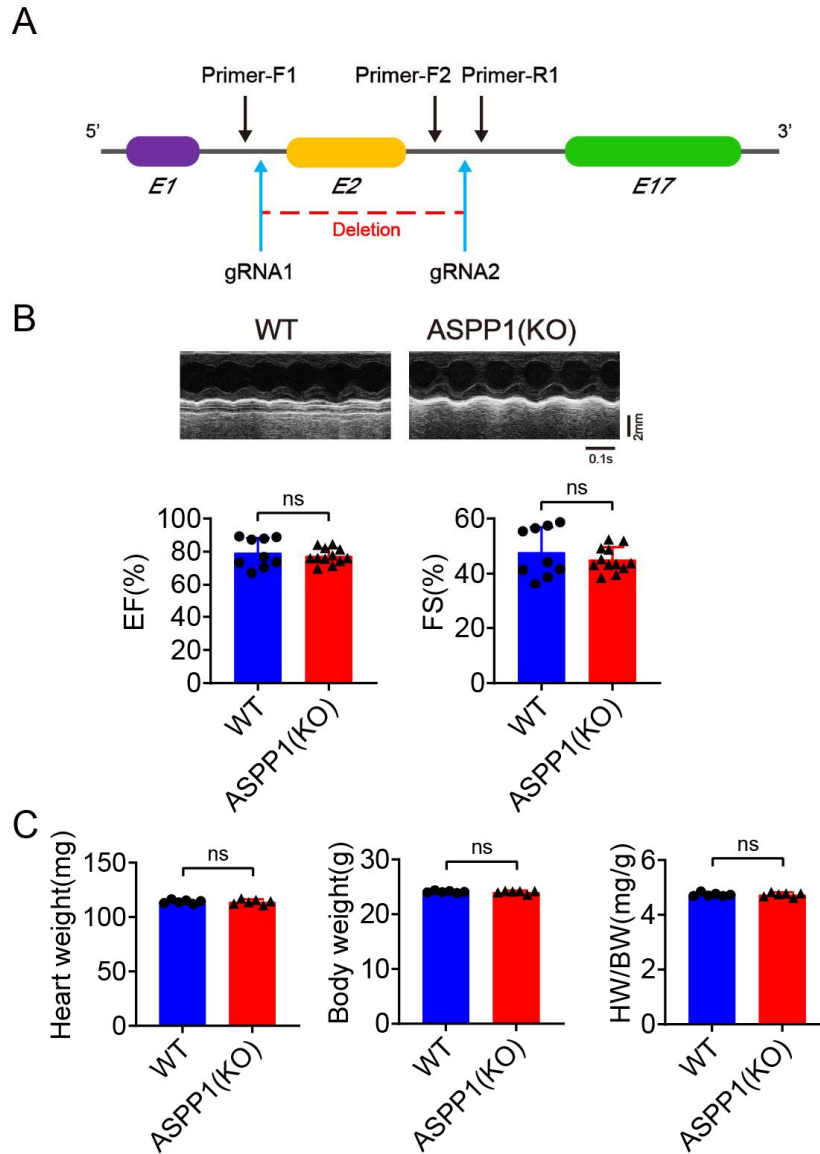

**Supplementary Figure 5. Generation of ASPP1 knockout mice.** (A) Strategy for the generation of ASPP1 knockout mice. (B) Cardiac function of WT and ASPP1 knockout (KO) mice by echocardiography (Student *t* test). *n* = 9 for WT, *n* = 12 for ASPP1(KO) mice. ns, not significant. (C) Base line heart weight (Student *t* test), body weight (Mann-Whitney *U* test), and heart weight/body weight (HW/BW) (Student *t* test) of WT and ASPP1 (KO) mice. *n* = 6. ns, not significant.

**Supplementary Figure 6**

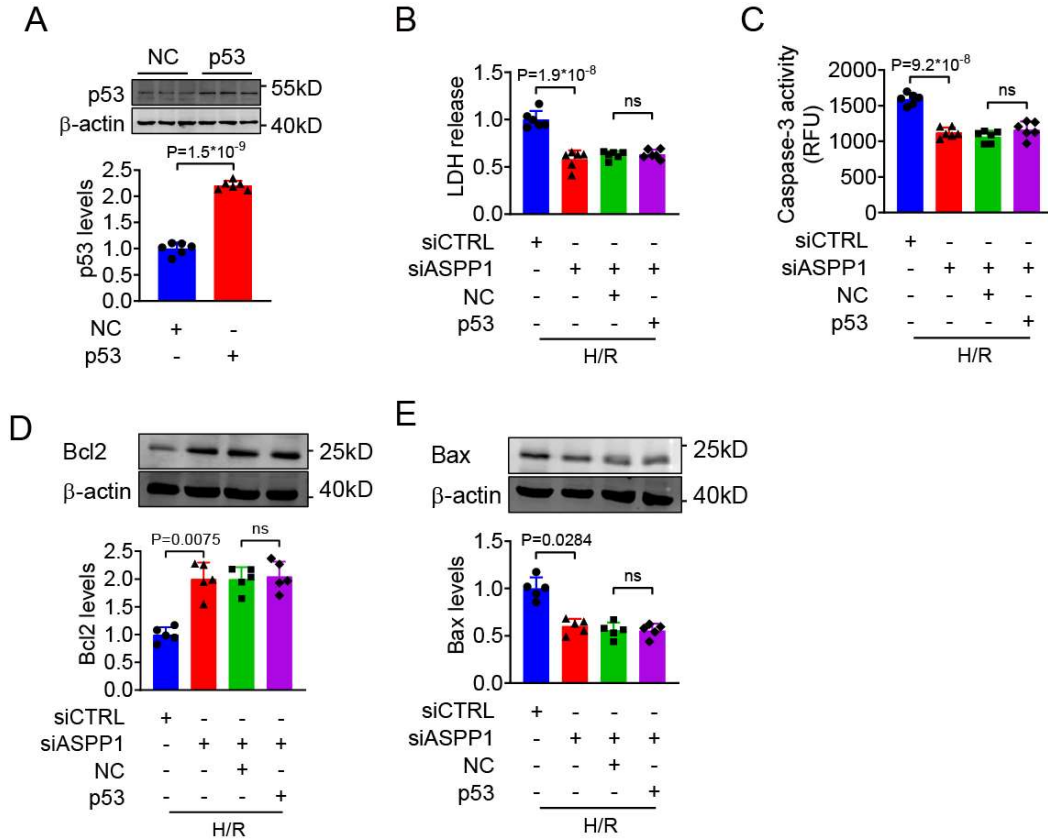

**Supplementary Figure 6. Overexpression of p53 does not affect the protective effects of ASPP1 knockdown in NMVCs under H/R stimulation.** (A) The efficiency of p53 overexpression plasmid in NMVCs by Western blot (Student *t* test). *n* = 6. (B) LDH release from NMVCs (One-way ANOVA, followed by Tukey post hoc multi-comparisons test). *n* = 6. ns, not significant. (C) Caspase-3 activity in NMVCs by ELISA assay (One-way ANOVA, followed by Tukey post hoc multi-comparisons test). *n* = 6. ns, not significant. (D-E) The protein levels of Bcl2 and Bax detected by Western blot (Kruskal-Wallis, followed by false discovery rate (FDR) method of Benjamini and Hochberg test). *n* = 5. ns, not significant.

## Supplementary Figure 7

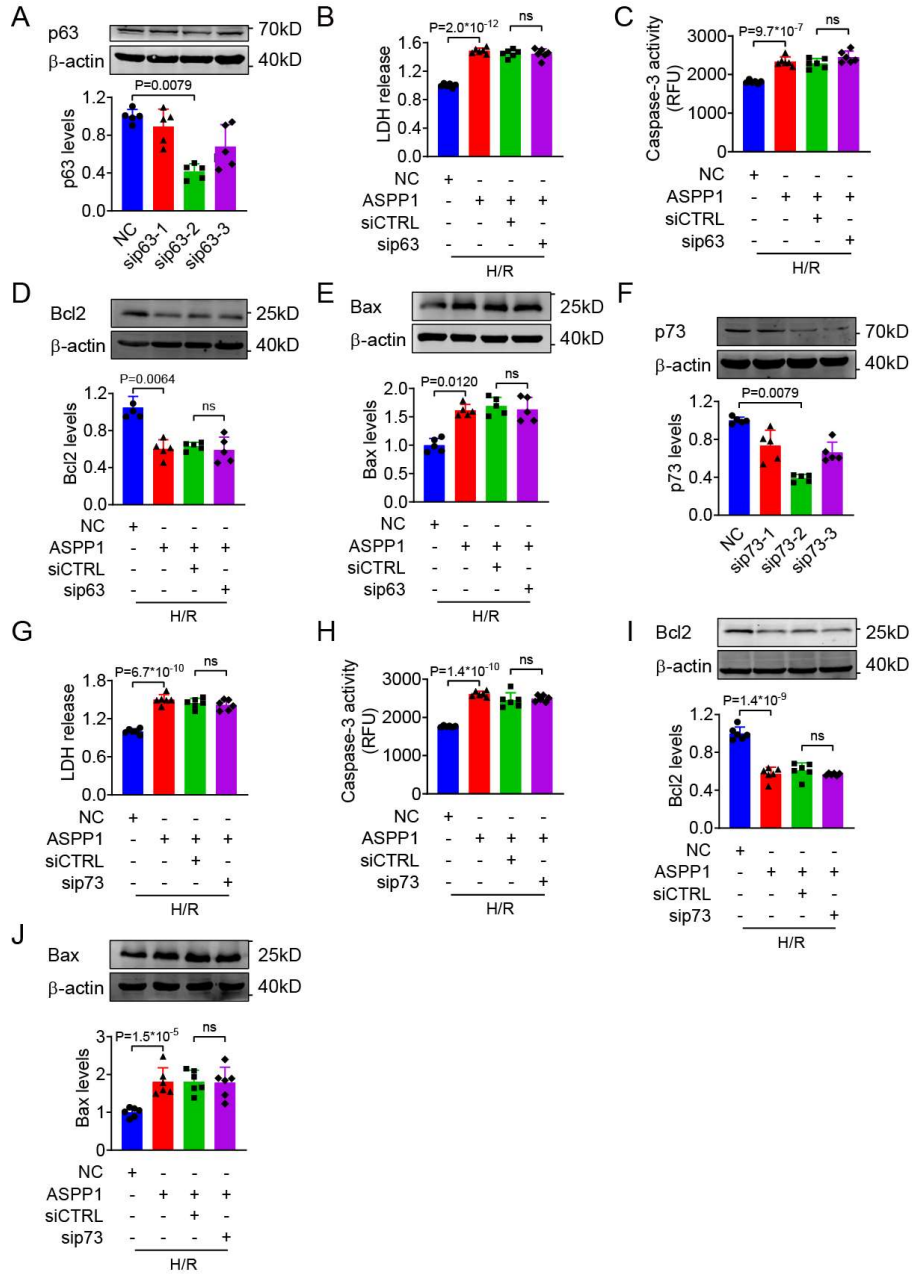

**Supplementary Figure 7. p63 and p73 produced no effects on ASPP1 induced NMVCs injury under H/R stimulation.** (A) The efficiency of small interfering RNA (siRNA) of p63 in NMVCs by Western blot (Mann-Whitney  $U$  test).  $n = 5$ . (B) LDH level in culture medium (One-way ANOVA, followed by Tukey post hoc multi-comparisons test).  $n = 6$ . ns, not significant. (C) Caspase-3 activity in NMVCs by ELISA assay (One-way ANOVA, followed

by Tukey post hoc multi-comparisons test). n = 6. ns, not significant. (D, E) The protein levels of Bcl2 and Bax detected by Western blot (Kruskal-Wallis, followed by false discovery rate (FDR) method of Benjamini and Hochberg test). n = 5. ns, not significant. (F) The efficiency of small interfering RNA (siRNA) of p73 in NMVCs by Western blot (Mann-Whitney *U* test). n = 5. (G) Cell death of NMVCs by LDH release (One-way ANOVA, followed by Tukey post hoc multi-comparisons test). n = 6. ns, not significant. (H) Caspase-3 activity in NMVCs by ELISA assay (One-way ANOVA, followed by Tukey post hoc multi-comparisons test). n = 6. ns, not significant. (I, J) The protein levels of Bcl2 and Bax detected by Western blot (One-way ANOVA, followed by Tukey post hoc multi-comparisons test). n = 6. ns, not significant.

## Supplementary Figure 8

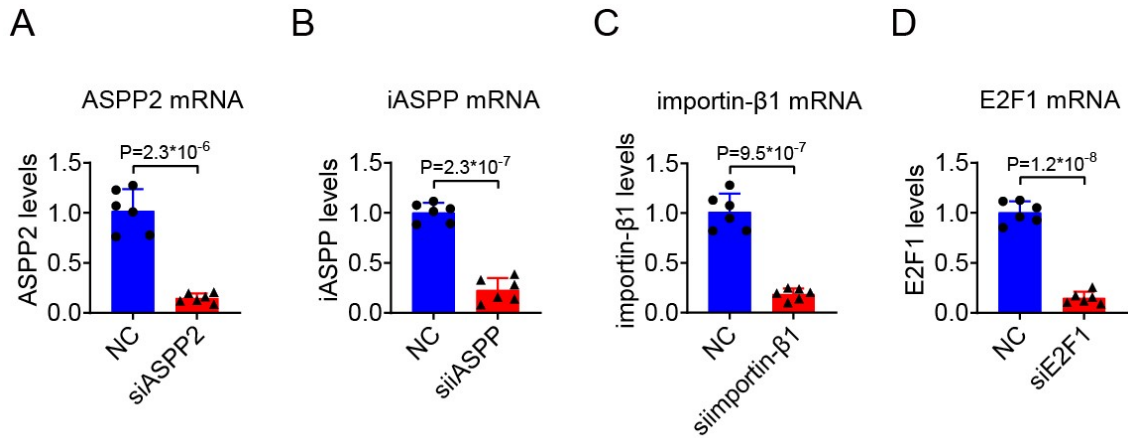

### Supplementary Figure 8. Efficiency of siRNA for ASPP2, iASPP, importin-β1 and E2F1.

(A) Efficiency of siASPP2 in NMVCs by qRT-PCR assay (Student *t* test). *n* = 6. (B) Efficiency of siiASPP in NMVCs by qRT-PCR assay (Student *t* test). *n* = 6. (C) Efficiency of siimportin-β1 in NMVCs by qRT-PCR assay (Student *t* test). *n* = 6. (D) Efficiency of siE2F1 in NMVCs by qRT-PCR assay (Student *t* test). *n* = 6.

## Supplementary Figure 9

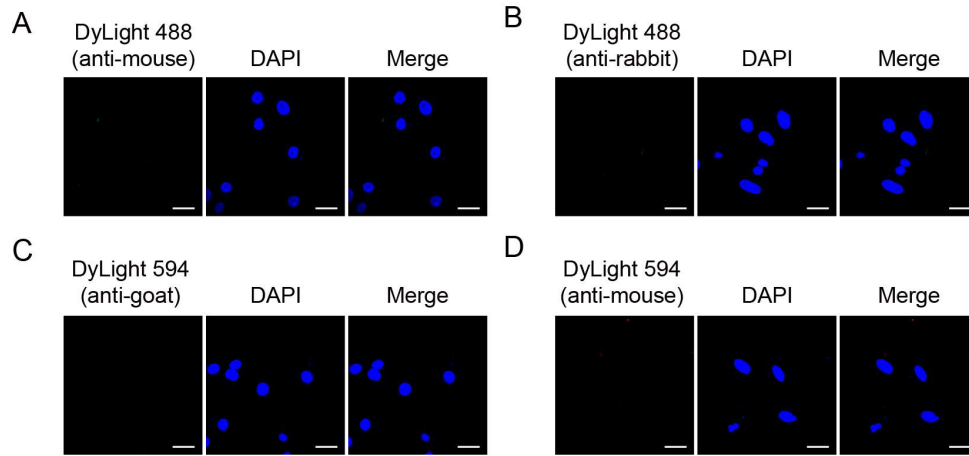

**Supplementary Figure 9.** Slices of NMVCs were permeabilized by 0.5% Triton X-100 with PBS and then blocked with 10% normal goat serum. (A-D) Slices of NMVCs were directly incubated with DyLight 488 (anti-mouse) (A), DyLight 488 (anti-rabbit) (B), DyLight 594 (anti-goat) (C) and DyLight 594 (anti-mouse) (D). Scale bar = 20  $\mu\text{m}$ .



## Supplementary Tables

**Supplementary Table 1. Overexpression of ASPP1 does not affect cardiac function in physiological mice.**

| <b>Group</b>   | <b>WT (n=14)</b> | <b>ASPP1(TG) (n=20)</b>   |
|----------------|------------------|---------------------------|
| EF, %          | 75.51±5.751      | 76.98±6.021 <sup>ns</sup> |
| FS, %          | 43.47±5.552      | 44.77±5.638 <sup>ns</sup> |
| LVIDd, mm      | 3.25±0.29        | 3.16±0.35 <sup>ns</sup>   |
| LVIDs, mm      | 1.85±0.29        | 1.75±0.32 <sup>ns</sup>   |
| LVEDV, $\mu$ l | 44.42±11.97      | 40.36±11.54 <sup>ns</sup> |
| LVESV, $\mu$ l | 10.79±3.921      | 9.63±4.63 <sup>ns</sup>   |

The data are expressed as means  $\pm$  SD. ns, not significant versus WT group. EF and LVIDs were analyzed by using nonpaired 2-tailed Student *t* test; LVIDd, LVEDV and LVESV were analyzed by using Mann-Whitney *U* test.

Abbreviations: EF, ejection fraction; FS, fractional shorting; LVIDd, left ventricular internal dimension at end diastole; LVIDs, left ventricular internal dimension at systole; LVEDV, left ventricular end diastolic volume; LVESV, left ventricular end systolic volume.

**Supplementary Table 2. Knockout of ASPP1 does not affect cardiac function in physiological mice.**

| Group          | WT (n=9)   | ASPP1(KO) (n=12)         |
|----------------|------------|--------------------------|
| EF, %          | 79.40±8.83 | 77.43±4.72 <sup>ns</sup> |
| FS, %          | 47.78±9.04 | 45.12±4.51 <sup>ns</sup> |
| LVIDd, mm      | 3.2±0.25   | 3.25±0.25 <sup>ns</sup>  |
| LVIDs, mm      | 1.68±0.35  | 1.79±0.22 <sup>ns</sup>  |
| LVEDV, $\mu$ l | 41.32±7.56 | 42.92±7.71 <sup>ns</sup> |
| LVESV, $\mu$ l | 8.74±4.39  | 9.78±3.15 <sup>ns</sup>  |

The data are expressed as means  $\pm$  SD. ns, not significant versus WT group. They were analyzed by using nonpaired 2-tailed Student *t* test.

**Supplementary Table 3. Overexpression of ASPP1 aggravates cardiac function in I/R mice.**

| Group          | Sham+WT<br>(n=9) | Sham+ASPP1<br>(TG) (n=9) | I/R+WT<br>(n=9)                                    | I/R+ASPP1(TG)<br>(n=9)                             |
|----------------|------------------|--------------------------|----------------------------------------------------|----------------------------------------------------|
| EF, %          | 75.45±3.77       | 75.98±3.47               | 59.03±3.95 ( <sup>a</sup> P=2.9*10 <sup>-7</sup> ) | 42.15±7.40 ( <sup>b</sup> P=1.6*10 <sup>-7</sup> ) |
| FS, %          | 43.10±3.61       | 43.45±2.99               | 30.63±2.62 ( <sup>a</sup> P=6.1*10 <sup>-8</sup> ) | 20.33±4.38 ( <sup>b</sup> P=2.6*10 <sup>-6</sup> ) |
| LVIDd, mm      | 3.15±0.12        | 3.09±0.35                | 3.55±0.13 ( <sup>a</sup> P=0.0088)                 | 3.64±0.41 ( <sup>b</sup> ns)                       |
| LVIDs, mm      | 1.79±0.11        | 1.75±0.26                | 2.46±0.17 ( <sup>a</sup> P=1.4*10 <sup>-6</sup> )  | 2.89±0.28 ( <sup>b</sup> P=0.0013)                 |
| LVEDV, $\mu$ l | 39.62±3.48       | 38.24±10.65              | 52.68±4.66 ( <sup>a</sup> P=0.0091)                | 56.73±15.50 ( <sup>b</sup> ns)                     |
| LVESV, $\mu$ l | 9.68±1.47        | 9.38±3.82                | 21.70±3.78 ( <sup>a</sup> P=3.7*10 <sup>-5</sup> ) | 32.35±7.66 ( <sup>b</sup> P=0.0002)                |

<sup>a</sup>P values were compared with Sham+WT group; <sup>b</sup>P values were compared with I/R+WT group. ns, not significant. EF, FS, LVIDs, and LVESV were analyzed by using two-way ANOVA

analysis followed by Tukey's post-hoc multi-comparison test. LVIDd and LVEDV were analyzed by using Kruskal-Wallis, followed by false discovery rate (FDR) method of Benjamini and Hochberg test. The data are expressed as means  $\pm$  SD.

**Supplementary Table 4. Knockout of ASPP1 improves cardiac function in I/R mice.**

| Group          | Sham+WT<br>(n=11) | Sham+ASPP<br>1<br>(KO) (n=11) | I/R+WT<br>(n=11)                                          | I/R+ASPP1(KO)<br>(n=11)                                  |
|----------------|-------------------|-------------------------------|-----------------------------------------------------------|----------------------------------------------------------|
| EF, %          | 75.62 $\pm$ 3.40  | 78.43 $\pm$ 8.12              | 58.24 $\pm$ 4.64 ( <sup>a</sup> P=6.5*10 <sup>-9</sup> )  | 69.20 $\pm$ 2.75 ( <sup>b</sup> P=7.3*10 <sup>-5</sup> ) |
| FS, %          | 43.17 $\pm$ 3.18  | 46.63 $\pm$ 8.21              | 30.12 $\pm$ 3.08 ( <sup>a</sup> P=7.6*10 <sup>-7</sup> )  | 37.71 $\pm$ 2.08 ( <sup>b</sup> P=0.0033)                |
| LVIDd, mm      | 3.11 $\pm$ 0.24   | 3.16 $\pm$ 0.30               | 3.61 $\pm$ 0.24 ( <sup>a</sup> P=0.0002)                  | 3.14 $\pm$ 0.22 ( <sup>b</sup> P=0.0002)                 |
| LVIDs, mm      | 1.77 $\pm$ 0.16   | 1.70 $\pm$ 0.36               | 2.52 $\pm$ 0.21 ( <sup>a</sup> P=3.7*10 <sup>-8</sup> )   | 1.96 $\pm$ 0.18 ( <sup>b</sup> P=1.4*10 <sup>-5</sup> )  |
| LVEDV, $\mu$ l | 38.53 $\pm$ 6.49  | 40.22 $\pm$ 8.39              | 55.03 $\pm$ 8.66 ( <sup>a</sup> P=0.0020)                 | 39.28 $\pm$ 6.42 ( <sup>b</sup> P=0.0002)                |
| LVESV, $\mu$ l | 9.39 $\pm$ 2.06   | 9.03 $\pm$ 4.28               | 23.07 $\pm$ 4.75 ( <sup>a</sup> P=3.4*10 <sup>-10</sup> ) | 12.19 $\pm$ 2.74 ( <sup>b</sup> P=9.8*10 <sup>-8</sup> ) |

<sup>a</sup>P values were compared with Sham+WT group; <sup>b</sup>P values were compared with I/R+WT group.

EF, FS, LVIDs and LVESV were analyzed by using two-way ANOVA analysis followed by Tukey's post-hoc multi-comparison test. LVIDd and LVEDV were analyzed by using Kruskal-Wallis, followed by false discovery rate (FDR) method of Benjamini and Hochberg test. The data are expressed as means  $\pm$  SD.

**Supplementary Table 5. AAV9-shp53 rescues the cardiac injury mediated by the transgenic overexpression of ASPP1.**

| <b>Group</b> | <b>I/R+WT<br/>(n=7)</b> | <b>I/R+ASPP1(TG) (n=7)</b>                         | <b>I/R+ASPP1(TG)+AAV9-NC<br/>(n=7)</b> | <b>I/R+ASPP1(TG)+AAV9-shp53<br/>(n=7)</b>           |
|--------------|-------------------------|----------------------------------------------------|----------------------------------------|-----------------------------------------------------|
| EF, %        | 62.63±2.46              | 48.25±2.54 ( <sup>a</sup> P=7.3*10 <sup>-9</sup> ) | 47.50±3.60                             | 63.98±2.54 ( <sup>b</sup> P=5.1*10 <sup>-10</sup> ) |
| FS, %        | 33.11±1.85              | 23.79±1.51 ( <sup>a</sup> P=7.3*10 <sup>-9</sup> ) | 23.38±2.09                             | 34.11±1.82 ( <sup>b</sup> P=4.6*10 <sup>-10</sup> ) |
| LVIDd, mm    | 3.55±0.15               | 3.72±0.17 ( <sup>a</sup> P=ns)                     | 3.77±0.19                              | 3.59±0.14 ( <sup>b</sup> P=ns)                      |
| LVIDs, mm    | 2.37±0.08               | 2.84±0.15 ( <sup>a</sup> P=2.1*10 <sup>-5</sup> )  | 2.89±0.19                              | 3.36±0.14 ( <sup>b</sup> P=3.0*10 <sup>-6</sup> )   |
| LVEDV, μl    | 52.77±5.07              | 59.13±6.53 ( <sup>a</sup> ns)                      | 61.06±7.33                             | 54.06±5.23 ( <sup>b</sup> P=ns)                     |
| LVESV, μl    | 19.66±1.71              | 30.63±4.11 ( <sup>a</sup> P=6.1*10 <sup>-5</sup> ) | 32.14±5.24                             | 19.53±2.78 ( <sup>b</sup> P=8.0*10 <sup>-6</sup> )  |

<sup>a</sup>P values were compared with I/R+WT group; <sup>b</sup>P values were compared with I/R+ASPP1(TG)+AAV9-NC group. ns, not significant. EF, FS, LVIDs and LVESV were analyzed by using two-way ANOVA analysis followed by Tukey's post-hoc multi-comparison test. LVIDd and LVEDV were analyzed by using Kruskal-Wallis, followed by false discovery rate (FDR) method of Benjamini and Hochberg test. The data are expressed as means ± SD.

**Supplementary Table 6. Sequences of mouse oligonucleotide primers used for real-time quantitative PCR**

|                     |         |                              |
|---------------------|---------|------------------------------|
| ASPP1               | Forward | 5'-CCACCAAGTCCCACATACCC-3'   |
|                     | Reverse | 5'-GGTGGCTGGTAGTTCTTAGGTG-3' |
| p53                 | Forward | 5'-CTCTCCCCCGCAAAGAAAAA-3'   |
|                     | Reverse | 5'-CGGAACATCTCGAAGCGTTTA-3'  |
| ASPP2               | Forward | 5'-CAAGCCTGTGATAGCTGCTG-3'   |
|                     | Reverse | 5'-GGCTTCTAAGTCAGCATCGC-3'   |
| iASPP               | Forward | 5'-TAGAGGCCCGTTTTGGACG-3'    |
|                     | Reverse | 5'-CCCGATCTAGGCTGCTGTAG-3'   |
| Bax                 | Forward | 5'-TGAAGACAGGGGCCTTTTTG-3'   |
|                     | Reverse | 5'-AATTCGCCGGAGACTCG-3'      |
| Puma                | Forward | 5'-AGCAGCACTTAGAGTCGCC-3'    |
|                     | Reverse | 5'-CCTGGGTAAGGGGAGGAGT-3'    |
| Noxa                | Forward | 5'-GCAGAGCTACCACCTGAGTTC-3'  |
|                     | Reverse | 5'-CTTTTGCGACTTCCCAGGCA-3'   |
| E2F1                | Forward | 5'-AGACCACCGACAGACCCGAT-3'   |
|                     | Reverse | 5'-AGCCGTTCCATAATGACCAG-3'   |
| importin- $\beta$ 1 | Forward | 5'-AGCCTAGGGATTCAGGGTGT-3'   |
|                     | Reverse | 5'-CAGAGGGTATGGATCGTGCT-3'   |
| $\beta$ -actin      | Forward | 5'-GGCTGTATTCCCCTCCATCG-3'   |
|                     | Reverse | 5'-CCAGTTGGTAACAATGCCATGT-3' |

**Supplementary Table 7. Detailed statistical analysis information for all main and supplementary figures.**

| Figure |                                | Groups (Sample size) | Normality test values | Statistical analysis       | P value                         |
|--------|--------------------------------|----------------------|-----------------------|----------------------------|---------------------------------|
| 1A     | ASPP1 levels (Input)           | Control (n=6)        | 0.1356                | nonpaired 2-tailed         |                                 |
|        |                                | H/R (n=6)            | 0.2619                | Student <i>t</i> test      | P= 0.000354003636749 vs Control |
|        | p53 levels (Input)             | Control (n=6)        | 0.8248                | nonpaired 2-tailed         |                                 |
|        |                                | H/R (n=6)            | 0.1397                | Student <i>t</i> test      | P=0.000636833131323 vs Control  |
|        | p53/ASPP1                      | Control (n=6)        | 0.0128                | Mann-Whitney <i>U</i> test |                                 |
|        |                                | H/R (n=6)            | 0.2218                |                            | P=0.002164502164502 vs Control  |
| 1B     | ASPP1 levels (Input)           | Control (n=6)        | 0.3884                | nonpaired 2-tailed         |                                 |
|        |                                | H/R (n=6)            | 0.1944                | Student <i>t</i> test      | P=0.000131112963606 vs Control  |
|        | p53 levels (Input)             | Control (n=6)        | 0.5156                | Mann-Whitney <i>U</i> test |                                 |
|        |                                | H/R (n=6)            | 0.0146                |                            | P=0.002164502164502 vs Control  |
|        | ASPP1/p53                      | Control (n=6)        | 0.2275                | nonpaired 2-tailed         |                                 |
|        |                                | H/R (n=6)            | 0.6580                | Student <i>t</i> test      | P=0.001011151797024 vs Control  |
| 1C     | Total ASPP1 levels             | Control (n=5)        | 0.2164                | Mann-Whitney <i>U</i> test |                                 |
|        |                                | H/R (n=5)            | 0.3517                |                            | P=0.007936507936508 vs Control  |
|        | ASPP1 nuclear/cyt oplasm ratio | Control (n=5)        | 0.5421                | Mann-Whitney <i>U</i> test |                                 |
|        |                                | H/R (n=5)            | 0.0538                |                            | P=0.007936507936508 vs Control  |
|        | Total p53 levels               | Control (n=5)        | 0.1230                | Mann-Whitney <i>U</i> test |                                 |
|        |                                | H/R (n=5)            | 0.6936                |                            | P=0.007936507936508 vs Control  |
|        | p53 nuclear/cyt oplasm ratio   | Control (n=5)        | 0.6549                | Mann-Whitney <i>U</i> test |                                 |
|        |                                | H/R (n=5)            | 0.0916                |                            | P=0.007936507936508 vs Control  |
| 1D     | Total ASPP1 levels             | Sham (n=5)           | 0.1451                | Mann-Whitney <i>U</i> test |                                 |
|        |                                | I/R (n=5)            | 0.5901                |                            | P=0.007936507936508 vs Sham     |
|        | ASPP1 nuclear/cyt oplasm       | Sham (n=5)           | 0.2289                | Mann-Whitney <i>U</i> test |                                 |
|        |                                | I/R (n=5)            | 0.6468                |                            | P=0.007936507936508             |

|              |                              |                   |                        |                                                                           |                             |
|--------------|------------------------------|-------------------|------------------------|---------------------------------------------------------------------------|-----------------------------|
|              | ratio                        |                   |                        |                                                                           | vs Sham                     |
|              | Total p53 levels             | Sham (n=5)        | 0.4280                 | Mann-Whitney <i>U</i> test                                                |                             |
|              |                              | I/R (n=5)         | 0.8189                 |                                                                           | P=0.007936507936508 vs Sham |
|              | p53 nuclear/cyt oplasm ratio | Sham (n=5)        | 0.5889                 | Mann-Whitney <i>U</i> test                                                |                             |
|              |                              | I/R (n=5)         | 0.2414                 |                                                                           | P=0.007936507936508 vs Sham |
| 2A           | Total p53 levels             | NC (n=5)          | 0.6490                 | Kruskal Wallis test with FDR (Benjamini-Hochberg method)                  |                             |
|              |                              | ASPP1 (n=5)       | 0.2341                 |                                                                           | P=0.872600061 vs NC         |
|              |                              | H/R+NC (n=5)      | 0.2234                 |                                                                           | P=0.005443982 vs NC         |
|              |                              |                   |                        |                                                                           | P=0.008814655 vs ASPP1      |
|              |                              | H/R+ASPP1 (n=5)   | 0.8586                 |                                                                           | P=0.006409444 vs NC         |
|              |                              |                   |                        |                                                                           | P=0.010296549 vs ASPP1      |
|              |                              |                   |                        |                                                                           | P=0.957371576 vs H/R+NC     |
|              | Nuclear p53 levels           | NC (n=6)          | 0.3279                 | one-way ANOVA analysis followed by Tukey's post-hoc multi-comparison test |                             |
|              |                              | ASPP1 (n=6)       | 0.1606                 |                                                                           | P=0.999575262 vs NC         |
|              |                              | H/R+NC (n=6)      | 0.9921                 |                                                                           | P=0.000149212 vs NC         |
|              |                              |                   |                        |                                                                           | P=0.000188613 vs ASPP1      |
|              |                              | H/R+ASPP1 (n=6)   | 0.1188                 |                                                                           | P=1.40832E-09 vs NC         |
|              |                              |                   |                        |                                                                           | P=1.65042E-09 vs ASPP1      |
|              |                              |                   |                        |                                                                           | P=2.59424E-05 vs H/R+NC     |
|              | Cytoplasmic p53 levels       | NC (n=6)          | 0.6742                 | one-way ANOVA analysis followed by Tukey's post-hoc multi-comparison test |                             |
|              |                              | ASPP1 (n=6)       | 0.2486                 |                                                                           | P=0.8612093 vs NC           |
| H/R+NC (n=6) |                              | 0.3334            | P=5.80237E-10 vs NC    |                                                                           |                             |
|              |                              |                   | P=1.91148E-10 vs ASPP1 |                                                                           |                             |
|              | H/R+ASPP1 (n=6)              | 0.1244            |                        | P=0.007177685 vs NC                                                       |                             |
|              |                              |                   |                        | P=0.001211221 vs ASPP1                                                    |                             |
|              |                              |                   |                        | P=2.53481E-07 vs H/R+NC                                                   |                             |
| 2B           | Total p53 levels             | NC (n=5)          | 0.7279                 | Kruskal Wallis test with FDR (Benjamini-Hochberg method)                  |                             |
|              |                              | siASPP1 (n=5)     | 0.7529                 |                                                                           | P=0.872600061 vs NC         |
|              |                              | H/R+NC (n=5)      | 0.3074                 |                                                                           | P=0.006409444 vs NC         |
|              |                              |                   |                        |                                                                           | P=0.010296549 vs siASPP1    |
|              |                              | H/R+siASPP1 (n=5) | 0.4816                 |                                                                           | P=0.005443982 vs NC         |
|              |                              |                   |                        | P=0.008814655 vs H/R+NC                                                   |                             |

|                        |                   |                             |                                                                           |                                                                           |                                                                           |                        |
|------------------------|-------------------|-----------------------------|---------------------------------------------------------------------------|---------------------------------------------------------------------------|---------------------------------------------------------------------------|------------------------|
|                        |                   |                             |                                                                           |                                                                           | siASPP1                                                                   |                        |
|                        |                   |                             |                                                                           |                                                                           | P=0.957371576 vs H/R+NC                                                   |                        |
| Nuclear p53 levels     | NC (n=6)          | 0.0608                      | one-way ANOVA analysis followed by Tukey's post-hoc multi-comparison test |                                                                           |                                                                           |                        |
|                        | siASPP1 (n=6)     | 0.4254                      |                                                                           | P=0.890271561 vs NC                                                       |                                                                           |                        |
|                        | H/R+NC (n=6)      | 0.9167                      |                                                                           | P=3.79031E-07 vs NC                                                       |                                                                           |                        |
|                        | H/R+siASPP1 (n=6) | 0.5781                      |                                                                           | P=1.50676E-06 vs siASPP1                                                  |                                                                           |                        |
|                        |                   |                             |                                                                           |                                                                           | P=0.163391288 vs NC                                                       |                        |
|                        |                   |                             |                                                                           |                                                                           | P=0.476240517 vs siASPP1                                                  |                        |
|                        |                   |                             |                                                                           |                                                                           | P=3.13601E-05 vs H/R+NC                                                   |                        |
| Cytoplasmic p53 levels | NC (n=6)          | 0.0857                      | one-way ANOVA analysis followed by Tukey's post-hoc multi-comparison test |                                                                           |                                                                           |                        |
|                        | siASPP1 (n=6)     | 0.4572                      |                                                                           | P=0.977118176 vs NC                                                       |                                                                           |                        |
|                        | H/R+NC (n=6)      | 0.4090                      |                                                                           | P=5.6342E-08 vs NC                                                        |                                                                           |                        |
|                        | H/R+siASPP1 (n=6) | 0.5957                      |                                                                           | P=2.80044E-08 vs siASPP1                                                  |                                                                           |                        |
|                        |                   |                             |                                                                           |                                                                           | P=2.26E-13 vs NC                                                          |                        |
|                        |                   |                             |                                                                           |                                                                           | P=1.56E-13 vs siASPP1                                                     |                        |
|                        |                   |                             |                                                                           |                                                                           | P=5.44347E-08 vs H/R+NC                                                   |                        |
| 2C                     | Total p53 levels  | NC (n=6)                    | 0.2033                                                                    | one-way ANOVA analysis followed by Tukey's post-hoc multi-comparison test |                                                                           |                        |
|                        |                   | ASPP1 (n=6)                 | 0.5668                                                                    |                                                                           | P=0.989996387 vs NC                                                       |                        |
|                        |                   | H/R+NC (n=6)                | 0.1009                                                                    |                                                                           | P=1.8229E-06 vs NC                                                        |                        |
|                        |                   | H/R+ASPP1 (n=6)             | 0.6750                                                                    |                                                                           | P=3.35579E-06 vs ASPP1                                                    |                        |
|                        |                   |                             |                                                                           |                                                                           |                                                                           | P=2.63546E-06 vs NC    |
|                        |                   |                             |                                                                           |                                                                           |                                                                           | P=4.88699E-06 vs ASPP1 |
|                        |                   |                             |                                                                           |                                                                           |                                                                           | P=0.9977131 vs H/R+NC  |
|                        |                   | p53 nuclear/cytoplasm ratio | NC (n=6)                                                                  | 0.0756                                                                    | one-way ANOVA analysis followed by Tukey's post-hoc multi-comparison test |                        |
| ASPP1 (n=6)            | 0.0567            |                             | P=0.677318729 vs NC                                                       |                                                                           |                                                                           |                        |
| H/R+NC (n=6)           | 0.3180            |                             | P=2.17767E-05 vs NC                                                       |                                                                           |                                                                           |                        |
| H/R+ASPP1 (n=6)        | 0.1446            |                             | P=0.000261169 vs ASPP1                                                    |                                                                           |                                                                           |                        |
|                        |                   |                             |                                                                           |                                                                           | P=3.1577E-11 vs NC                                                        |                        |
|                        |                   |                             |                                                                           |                                                                           | P=1.37621E-10 vs ASPP1                                                    |                        |
|                        |                   |                             |                                                                           |                                                                           | P=5.76212E-07 vs H/R+NC                                                   |                        |
| 2D                     | Total p53 levels  | NC (n=6)                    | 0.4379                                                                    | one-way ANOVA analysis followed by Tukey's post-hoc multi-comparison test |                                                                           |                        |
|                        |                   | siASPP1 (n=6)               | 0.7105                                                                    |                                                                           | P=0.999486663 vs NC                                                       |                        |
|                        |                   | H/R+NC (n=6)                | 0.1367                                                                    |                                                                           | P=2.02489E-08 vs NC                                                       |                        |
|                        |                   |                             |                                                                           |                                                                           | P=2.44514E-08 vs                                                          |                        |



|    |                                |                         |        |                                                                           |                                                                                       |
|----|--------------------------------|-------------------------|--------|---------------------------------------------------------------------------|---------------------------------------------------------------------------------------|
|    |                                | H/R+siASPP1 (n=6)       | 0.9552 |                                                                           | siASPP1<br>P=3.90555E-08 vs NC<br>P=4.73988E-08 vs siASPP1<br>P=0.980091641 vs H/R+NC |
|    | p53 nuclear/cyt oplasm ratio   | NC (n=6)                | 0.2868 | one-way ANOVA analysis followed by Tukey's post-hoc multi-comparison test |                                                                                       |
|    |                                | siASPP1 (n=6)           | 0.9838 |                                                                           | P=0.992785996 vs NC                                                                   |
|    |                                | H/R+NC (n=6)            | 0.9954 |                                                                           | P=1.67616E-06 vs NC<br>P=2.88714E-06 vs siASPP1                                       |
|    |                                | H/R+siASPP1 (n=6)       | 0.9115 |                                                                           | P=0.98827785 vs NC<br>P=0.999956262 vs siASPP1<br>P=3.18814E-06 vs NC+H/R             |
| 2E |                                | NC+H/R(n=5)             | 0.5499 | Mann-Whitney <i>U</i> test                                                |                                                                                       |
|    |                                | Sip53+H/R (n=5)         | 0.1132 |                                                                           | P=0.007936507936508 vs NC+H/R                                                         |
| 2F | ASPP1 nuclear/cyt oplasm ratio | NC+H/R (n=5)            | 0.5499 | Mann-Whitney <i>U</i> test                                                |                                                                                       |
|    |                                | Siimportin-β1+H/R (n=5) | 0.7922 |                                                                           | P=0.007936507936508 vs NC+H/R                                                         |
|    | p53 nuclear/cyt oplasm ratio   | NC+H/R (n=5)            | 0.9707 | Mann-Whitney <i>U</i> test                                                |                                                                                       |
|    |                                | Siimportin-β1+H/R (n=5) | 0.6740 |                                                                           | P=0.007936507936508 vs NC+H/R                                                         |
| 2G | Bax levels                     | NC (n=9)                | 0.5396 | one-way ANOVA analysis followed by Tukey's post-hoc multi-comparison test |                                                                                       |
|    |                                | ASPP1 (n=9)             | 0.1089 |                                                                           | P=0.999704054 vs NC                                                                   |
|    |                                | H/R+NC (n=9)            | 0.5254 |                                                                           | P=0.000355144 vs NC<br>P=0.000462575 vs ASPP1                                         |
|    |                                | H/R+ASPP1 (n=9)         | 0.6296 |                                                                           | P=1.04E-13 vs NC<br>P=1.04E-13 vs ASPP1<br>P=4.637E-11 vs H/R+NC                      |
|    | Puma levels                    | NC (n=9)                | 0.7920 | one-way ANOVA analysis followed by Tukey's post-hoc multi-comparison test |                                                                                       |
|    |                                | ASPP1 (n=9)             | 0.6469 |                                                                           | P=0.998052082 vs NC                                                                   |
|    |                                | H/R+NC (n=9)            | 0.7607 |                                                                           | P=0.000444708 vs NC<br>P=0.000728832 vs ASPP1                                         |
|    |                                | H/R+ASPP1 (n=9)         | 0.9493 |                                                                           | P=1.09E-13 vs NC<br>P=1.12E-13 vs ASPP1<br>P=1.35741E-10 vs H/R+NC                    |

|    |                         |                   |        |                                                                           |                             |
|----|-------------------------|-------------------|--------|---------------------------------------------------------------------------|-----------------------------|
|    | Noxa levels             | NC (n=9)          | 0.5163 | one-way ANOVA analysis followed by Tukey's post-hoc multi-comparison test |                             |
|    |                         | ASPP1 (n=9)       | 0.3974 |                                                                           | P=0.993239184 vs NC         |
|    |                         | H/R+NC (n=9)      | 0.3354 |                                                                           | P=7.26598E-06 vs NC         |
|    |                         | H/R+ASPP1 (n=9)   | 0.3343 |                                                                           | P=1.56771E-05 vs ASPP1      |
| 2H | Bax levels              | NC (n=8)          | 0.0089 | Kruskal Wallis test with FDR (Benjamini-Hochberg method)                  |                             |
|    |                         | siASPP1 (n=8)     | 0.2418 |                                                                           | P=0.337355652 vs NC         |
|    |                         | H/R+NC (n=8)      | 0.5982 |                                                                           | P=9.69282E-06 vs NC         |
|    |                         | H/R+siASPP1 (n=8) | 0.0006 |                                                                           | P=0.000531195 vs siASPP1    |
|    | Puma levels             | NC (n=9)          | 0.5755 | one-way ANOVA analysis followed by Tukey's post-hoc multi-comparison test |                             |
|    |                         | siASPP1 (n=9)     | 0.2370 |                                                                           | P=0.822204478 vs NC         |
|    |                         | H/R+NC (n=9)      | 0.8387 |                                                                           | P=7.1124E-11 vs NC          |
|    |                         | H/R+siASPP1 (n=9) | 0.4793 |                                                                           | P=9.349E-12 vs siASPP1      |
|    | Noxa levels             | NC (n=8)          | 0.3229 | Kruskal Wallis test with FDR (Benjamini-Hochberg method)                  |                             |
|    |                         | siASPP1 (n=8)     | 0.0058 |                                                                           | P=0.81599853 vs NC          |
|    |                         | H/R+NC (n=8)      | 0.5871 |                                                                           | P=0.318340125 vs siASPP1    |
|    |                         | H/R+siASPP1 (n=8) | 0.6401 |                                                                           | P=6.20111E-10 vs H/R+NC     |
| 3A | mRNA levels of ASPP1    | Sham (n=6)        | 0.6304 | nonpaired 2-tailed Student <i>t</i> test                                  |                             |
|    |                         | I/R (n=6)         | 0.4433 |                                                                           | P=8.44977E-05 vs Sham       |
|    | protein levels of ASPP1 | Sham (n=6)        | 0.4787 | Mann-Whitney <i>U</i> test                                                |                             |
|    |                         | I/R (n=6)         | 0.0093 |                                                                           | P=0.002164502164502 vs Sham |
| 3B | mRNA levels of ASPP1    | Control(n=9)      | 0.3273 | nonpaired 2-tailed Student <i>t</i> test                                  |                             |
|    |                         | H/R (n=9)         | 0.8890 |                                                                           | P=1.30701E-06 vs Control    |
|    | protein levels of ASPP1 | Control (n=6)     | 0.6238 | nonpaired 2-tailed Student <i>t</i> test                                  |                             |
|    |                         | H/R (n=6)         | 0.8123 |                                                                           | P=6.75828E-05 vs Control    |

|                     |                                 |                    |                      |                                                                           |                                                                           |                           |
|---------------------|---------------------------------|--------------------|----------------------|---------------------------------------------------------------------------|---------------------------------------------------------------------------|---------------------------|
| 3C                  | E2F1 levels ( <i>in vivo</i> )  | Sham (n=6)         | 0.9006               | nonpaired 2-tailed Student <i>t</i> test                                  | P=4.32413E-07 vs Sham                                                     |                           |
|                     |                                 | I/R (n=6)          | 0.1460               |                                                                           |                                                                           |                           |
|                     | E2F1 levels ( <i>in vitro</i> ) | Control (n=6)      | 0.5126               | nonpaired 2-tailed Student <i>t</i> test                                  | P=1.90083E-07 vs Control                                                  |                           |
|                     |                                 | H/R (n=6)          | 0.7646               |                                                                           |                                                                           |                           |
| 3D                  | mRNA levels of ASPP1            | Control (n=5)      | 0.999                | Kruskal Wallis test with FDR (Benjamini-Hochberg method)                  | P=0.004581111 vs Control                                                  |                           |
|                     |                                 | H/R (n=5)          | 0.4379               |                                                                           | P=0.007481307 vs Control                                                  |                           |
|                     |                                 | H/R+NC (n=5)       | 0.0378               |                                                                           | P=0.872504983 vs H/R                                                      |                           |
|                     |                                 | H/R+E2F1(SI) (n=5) | 0.9088               |                                                                           | P=0.872504983 vs Control                                                  |                           |
|                     | protein levels of ASPP1         | Control (n=6)      | 0.4088               | one-way ANOVA analysis followed by Tukey's post-hoc multi-comparison test | P=1.04794E-09 vs Control                                                  |                           |
|                     |                                 | H/R (n=6)          | 0.1068               |                                                                           | P=1.63264E-10 vs Control                                                  |                           |
|                     |                                 | H/R+NC (n=6)       | 0.7878               |                                                                           | P=0.170118127 vs H/R                                                      |                           |
|                     |                                 | H/R+E2F1(SI) (n=6) | 0.8604               |                                                                           | P=0.04045555 vs Control                                                   |                           |
|                     | 3E                              |                    | WT (n=6)             | 0.7438                                                                    | Mann-Whitney <i>U</i> test                                                | P=0.002164502164502 vs WT |
|                     |                                 |                    | ASPP1(TG) (n=6)      | 0.0401                                                                    |                                                                           |                           |
|                     | 3F                              | EF                 | WT+Sham (n=9)        | 0.3584                                                                    | two-way ANOVA analysis followed by Tukey's post-hoc multi-comparison test | P=0.995724123 vs WT+Sham  |
|                     |                                 |                    | ASPP1(TG)+Sham (n=9) | 0.6918                                                                    |                                                                           | P=2.86621E-07 vs WT+Sham  |
| WT+I/R (n=9)        |                                 |                    | 0.4626               | P=1.51667E-07 vs ASPP1(TG)+Sham                                           |                                                                           |                           |
| ASPP1(TG)+I/R (n=9) |                                 |                    | 0.3370               | P=1.11E-13 vs WT+Sham                                                     |                                                                           |                           |
| FS                  |                                 | WT+Sham (n=9)      | 0.2560               | two-way ANOVA analysis followed by                                        | P=1.08E-13 vs ASPP1(TG)+Sham                                              |                           |
|                     |                                 |                    |                      |                                                                           | P=1.63415E-07 vs WT+I/R                                                   |                           |

|    |      |                       |        |                                                                           |                                 |
|----|------|-----------------------|--------|---------------------------------------------------------------------------|---------------------------------|
|    |      | ASPP1(TG)+Sham (n=9)  | 0.7281 | Tukey's post-hoc multi-comparison test                                    | P=0.996340287 vs WT+Sham        |
|    |      | WT+I/R (n=9)          | 0.4289 |                                                                           | P=6.09478E-08 vs WT+Sham        |
|    |      | ASPP1(TG)+I/R (n=9)   | 0.2479 |                                                                           | P=3.37548E-08 vs ASPP1(TG)+Sham |
|    |      |                       |        |                                                                           | P=1.25E-13 vs WT+Sham           |
|    |      |                       |        |                                                                           | P=1.16E-13 vs ASPP1(TG)+Sham    |
|    |      |                       |        |                                                                           | P=2.59946E-06 vs WT+I/R         |
| 3G |      | WT+I/R (n=10)         | 0.2845 | nonpaired 2-tailed                                                        |                                 |
|    |      | ASPP1(TG)+I/R (n=10)  | 0.9348 | Student <i>t</i> test                                                     | P=5.20283E-07 vs WT+I/R         |
| 3H | LDH  | WT+Sham (n=10)        | 0.5771 | two-way ANOVA analysis followed by Tukey's post-hoc multi-comparison test |                                 |
|    |      | ASPP1(TG)+Sham (n=10) | 0.0596 |                                                                           | P=0.971026736 vs WT+Sham        |
|    |      | WT+I/R (n=12)         | 0.8377 |                                                                           | P=4.71E-13 vs WT+Sham           |
|    |      | ASPP1(TG)+I/R (n=12)  | 0.7899 |                                                                           | P=4.71E-13 vs ASPP1(TG)+Sham    |
|    |      |                       |        |                                                                           | P=4.71E-13 vs WT+Sham           |
|    |      |                       |        |                                                                           | P=4.71E-13 vs ASPP1(TG)+Sham    |
|    |      |                       |        |                                                                           | P=5.16E-13 vs WT+I/R            |
|    | CKMB | WT+Sham (n=9)         | 0.5697 | two-way ANOVA analysis followed by Tukey's post-hoc multi-comparison test |                                 |
|    |      | ASPP1(TG)+Sham (n=9)  | 0.1612 |                                                                           | P=0.999436795 vs WT+Sham        |
|    |      | WT+I/R (n=9)          | 0.4889 |                                                                           | P=1.01E-13 vs WT+Sham           |
|    |      | ASPP1(TG)+I/R (n=9)   | 0.1072 |                                                                           | P=1.01E-13 vs ASPP1(TG)+Sham    |
|    |      |                       |        |                                                                           | P=1E-13 vs WT+Sham              |
|    |      |                       |        |                                                                           | P=1E-13 vs ASPP1(TG)+Sham       |
|    |      |                       |        |                                                                           | P=3.67571E-10 vs WT+I/R         |
| 3I |      | WT+Sham (n=9)         | 0.6496 | two-way ANOVA analysis followed by Tukey's post-hoc multi-comparison test |                                 |
|    |      | ASPP1(TG)+Sham (n=9)  | 0.8984 |                                                                           | P=0.996034844 vs WT+Sham        |
|    |      | WT+I/R (n=9)          | 0.8501 |                                                                           | P=1.65567E-06 vs WT+Sham        |

|    |                  |                      |        |                                                                           |                                 |
|----|------------------|----------------------|--------|---------------------------------------------------------------------------|---------------------------------|
|    |                  |                      |        |                                                                           | P=3.12824E-06 vs ASPP1(TG)+Sham |
|    |                  | ASPP1(TG)+I/R (n=9)  | 0.3625 |                                                                           | P=1.04E-13 vs WT+Sham           |
|    |                  |                      |        |                                                                           | P=1.05E-13 vs ASPP1(TG)+Sham    |
|    |                  |                      |        |                                                                           | P=4.73187E-09 vs WT+I/R         |
| 3J | Bcl-2            | WT+Sham (n=6)        | 0.7153 | two-way ANOVA analysis followed by Tukey's post-hoc multi-comparison test |                                 |
|    |                  | ASPP1(TG)+Sham (n=6) | 0.4573 |                                                                           | P=0.626571604 vs WT+Sham        |
|    |                  | WT+I/R (n=6)         | 0.0580 |                                                                           | P=3.86021E-07 vs WT+Sham        |
|    |                  | ASPP1(TG)+I/R (n=6)  | 0.0799 |                                                                           | P=4.18363E-06 vs ASPP1(TG)+Sham |
|    |                  |                      |        |                                                                           | P=8.8617E-11 vs WT+Sham         |
|    |                  |                      |        |                                                                           | P=4.74575E-10 vs ASPP1(TG)+Sham |
|    |                  |                      |        |                                                                           | P=0.000200635 vs WT+I/R         |
|    | Bax              | WT+Sham (n=6)        | 0.6880 | two-way ANOVA analysis followed by Tukey's post-hoc multi-comparison test |                                 |
|    |                  | ASPP1(TG)+Sham (n=6) | 0.5282 |                                                                           | P=0.99931268 vs WT+Sham         |
|    |                  | WT+I/R (n=6)         | 0.5124 |                                                                           | P=0.001449762 vs WT+Sham        |
|    |                  | ASPP1(TG)+I/R (n=6)  | 0.7617 |                                                                           | P=0.001095024 vs ASPP1(TG)+Sham |
|    |                  |                      |        |                                                                           | P= 7.01575E-10 vs WT+Sham       |
|    |                  |                      |        |                                                                           | P=5.86235E-10 vs ASPP1(TG)+Sham |
|    |                  |                      |        |                                                                           | P=1.24982E-06 vs WT+I/R         |
| 3K | Total p53 levels | WT+Sham (n=6)        | 0.4310 | two-way ANOVA analysis followed by Tukey's post-hoc multi-comparison test |                                 |
|    |                  | ASPP1(TG)+Sham (n=6) | 0.2200 |                                                                           | P=0.997301824 vs WT+Sham        |
|    |                  | WT+I/R (n=6)         | 0.5514 |                                                                           | P=7.63E-13 vs WT+Sham           |
|    |                  | ASPP1(TG)+I/R (n=6)  | 0.0895 |                                                                           | P=6.17E-13 vs ASPP1(TG)+Sham    |
|    |                  |                      |        |                                                                           | P=1.4E-12 vs WT+Sham            |
|    |                  |                      |        |                                                                           | P=1.125E-12 vs ASPP1(TG)+Sham   |

|    |                             |                      |        |                                                                           |                                 |
|----|-----------------------------|----------------------|--------|---------------------------------------------------------------------------|---------------------------------|
|    |                             |                      |        |                                                                           | P=0.947037526 vs WT+I/R         |
|    | p53 nuclear/cytoplasm ratio | WT+Sham (n=6)        | 0.1752 | two-way ANOVA analysis followed by Tukey's post-hoc multi-comparison test |                                 |
|    |                             | ASPP1(TG)+Sham (n=6) | 0.8130 |                                                                           | P=0.996998662 vs WT+Sham        |
|    |                             | WT+I/R (n=6)         | 0.6513 |                                                                           | P=4.90709E-06 vs WT+Sham        |
|    |                             | ASPP1(TG)+I/R (n=6)  | 0.2234 |                                                                           | P=3.25085E-06 vs ASPP1(TG)+Sham |
|    |                             |                      |        |                                                                           | P=3.214E-12 vs WT+Sham          |
|    |                             |                      |        |                                                                           | P=2.548E-12 vs ASPP1(TG)+Sham   |
|    |                             |                      |        |                                                                           | P=6.35812E-08 vs WT+I/R         |
| 4A |                             | NC (n=6)             | 0.6724 | nonpaired 2-tailed Student <i>t</i> test                                  |                                 |
|    |                             | ASPP1 (n=6)          | 0.1831 |                                                                           | P=2.10846E-05 vs NC             |
| 4B |                             | Control (n=6)        | 0.1600 | one-way ANOVA analysis followed by Tukey's post-hoc multi-comparison test |                                 |
|    |                             | H/R (n=6)            | 0.5820 |                                                                           | P=4.8E-14 vs Control            |
|    |                             | H/R+NC (n=6)         | 0.9479 |                                                                           | P=3.7E-14 vs Control            |
|    |                             | H/R+ASPP1 (n=6)      | 0.5761 |                                                                           | P=0.898463348 vs H/R            |
|    |                             |                      |        |                                                                           | P=2.3E-14 vs Control            |
|    |                             |                      |        |                                                                           | P=1.90757E-09 vs H/R            |
|    |                             |                      |        |                                                                           | P=5.64292E-09 vs NC+H/R         |
| 4C |                             | Control (n=6)        | 0.4097 | one-way ANOVA analysis followed by Tukey's post-hoc multi-comparison test |                                 |
|    |                             | H/R (n=6)            | 0.3212 |                                                                           | P=3.306E-10 vs Control          |
|    |                             | H/R+NC (n=6)         | 0.4716 |                                                                           | P=3.96371E-10 vs Control        |
|    |                             | H/R+ASPP1 (n=6)      | 0.1196 |                                                                           | P=0.999234872 vs H/R            |
|    |                             |                      |        |                                                                           | P=2.3E-14 vs Control            |
|    |                             |                      |        |                                                                           | P=5.3965E-11 vs H/R             |
|    |                             |                      |        |                                                                           | P=4.5807E-11 vs NC+H/R          |
| 4D |                             | Control (n=6)        | 0.5959 | one-way ANOVA analysis followed by Tukey's post-hoc multi-comparison test |                                 |
|    |                             | H/R (n=6)            | 0.6259 |                                                                           | P=3.1E-14 vs Control            |
|    |                             | H/R+NC (n=6)         | 0.8878 |                                                                           | P=3.1E-14 vs Control            |
|    |                             | H/R+ASPP1 (n=6)      | 0.2636 |                                                                           | P=0.99999999804002 vs H/R       |
|    |                             |                      |        |                                                                           | P=2.3E-14 vs Control            |
|    |                             |                      |        |                                                                           | P=7.59494E-08 vs H/R            |
|    |                             |                      |        |                                                                           | P=7.60583E-08 vs NC+H/R         |
| 4E |                             | Control (n=6)        | 0.9673 | one-way ANOVA                                                             |                                 |

|    |    |                       |        |                                                                           |                                 |
|----|----|-----------------------|--------|---------------------------------------------------------------------------|---------------------------------|
|    |    | H/R (n=6)             | 0.5021 | analysis followed by Tukey's post-hoc multi-comparison test               | P=1.50351E-05 vs Control        |
|    |    | H/R+NC (n=6)          | 0.2270 |                                                                           | P=8.99475E-06 vs Control        |
|    |    | H/R+ASPP1 (n=6)       | 0.3283 |                                                                           | P=0.994739552 vs H/R            |
|    |    |                       |        |                                                                           | P=1.16402E-09 vs Control        |
|    |    |                       |        | P=0.000199025 vs H/R                                                      |                                 |
|    |    |                       |        | P=0.000344819 vs NC+H/R                                                   |                                 |
| 4F |    | Control (n=6)         | 0.1602 | one-way ANOVA analysis followed by Tukey's post-hoc multi-comparison test |                                 |
|    |    | H/R (n=6)             | 0.7057 |                                                                           | P=1.12672E-05 vs Control        |
|    |    | H/R+NC (n=6)          | 0.7665 |                                                                           | P=4.83055E-06 vs Control        |
|    |    | H/R+ASPP1 (n=6)       | 0.6032 |                                                                           | P=0.976569466 vs H/R            |
|    |    |                       |        | P=1.8004E-11 vs Control                                                   |                                 |
|    |    |                       |        | P=4.38409E-07 vs H/R                                                      |                                 |
|    |    |                       |        | P=9.59008E-07 vs NC+H/R                                                   |                                 |
| 4G |    | Control (n=6)         | 0.6700 | one-way ANOVA analysis followed by Tukey's post-hoc multi-comparison test |                                 |
|    |    | H/R (n=6)             | 0.7974 |                                                                           | P=0.000302538 vs Control        |
|    |    | H/R+NC (n=6)          | 0.1783 |                                                                           | P=0.000664013 vs Control        |
|    |    | H/R+ASPP1 (n=6)       | 0.5723 |                                                                           | P=0.985281237 vs H/R            |
|    |    |                       |        | P=2.78938E-08 vs Control                                                  |                                 |
|    |    |                       |        | P=0.000810792 vs H/R                                                      |                                 |
|    |    |                       |        | P=0.000368876 vs NC+H/R                                                   |                                 |
| 5A |    | WT (n=6)              | 0.4983 | nonpaired 2-tailed Student <i>t</i> test                                  |                                 |
|    |    | ASPP1(KO) (n=6)       | 0.1535 |                                                                           | P=8.10021E-07 vs WT             |
| 5B | EF | WT+Sham (n=11)        | 0.6023 | two-way ANOVA analysis followed by Tukey's post-hoc multi-comparison test |                                 |
|    |    | ASPP1(KO)+Sham (n=11) | 0.3526 |                                                                           | P=0.5848123762 vs WT+Sham       |
|    |    | WT+I/R (n=11)         | 0.7810 |                                                                           | P=6.5373E-9 vs WT+Sham          |
|    |    | ASPP1(KO)+I/R (n=11)  | 0.4097 |                                                                           | P=1.33244E-10 vs ASPP1(KO)+Sham |
|    |    |                       |        | P=0.02838704 vs WT+Sham                                                   |                                 |
|    |    |                       |        | P=0.000831822 vs ASPP1(KO)+Sham                                           |                                 |

|    |                       |        |                                                                           |                                 |                                 |
|----|-----------------------|--------|---------------------------------------------------------------------------|---------------------------------|---------------------------------|
|    |                       |        |                                                                           |                                 | P=7.29144E-05 vs WT+I/R         |
| FS | WT+Sham (n=11)        | 0.4535 | two-way ANOVA analysis followed by Tukey's post-hoc multi-comparison test |                                 |                                 |
|    | ASPP1(KO)+Sham (n=11) | 0.3704 |                                                                           | P=0.338366479 vs WT+Sham        |                                 |
|    | WT+I/R (n=11)         | 0.8341 |                                                                           | P=7.6156E-07 vs WT+Sham         |                                 |
|    | ASPP1(KO)+I/R (n=11)  | 0.3639 |                                                                           | P=3.46549E-09 vs ASPP1(KO)+Sham |                                 |
|    |                       |        |                                                                           |                                 | P=0.050276088 vs WT+Sham        |
|    |                       |        |                                                                           |                                 | P=0.00047368 vs ASPP1(KO)+Sham  |
|    |                       |        |                                                                           |                                 | P=0.003278664 vs WT+I/R         |
| 5C | WT+I/R (n=15)         | 0.0304 | Mann-Whitney <i>U</i> test                                                |                                 |                                 |
|    | ASPP1(KO)+I/R (n=15)  | 0.8587 |                                                                           | P=1.28935E-08 vs WT+I/R         |                                 |
| 5D | WT+Sham (n=13)        | 0.3464 | Kruskal Wallis test with FDR (Benjamini-Hochberg method)                  |                                 |                                 |
|    | ASPP1(KO)+Sham (n=13) | 0.4114 |                                                                           | P=0.9138197 vs WT+Sham          |                                 |
|    | WT+I/R (n=15)         | 0.0031 |                                                                           | P=1.38128E-08 vs WT+Sham        |                                 |
|    | ASPP1(KO)+I/R (n=15)  | 0.0419 |                                                                           | P=7.13507E-09 vs ASPP1(KO)+Sham |                                 |
|    |                       |        |                                                                           |                                 | P=0.001250895 vs WT+Sham        |
|    |                       |        |                                                                           |                                 | P=0.000840703 vs ASPP1(KO)+Sham |
|    |                       |        |                                                                           |                                 | 0.01104994 vs WT+I/R            |
| 5E | WT+Sham (n=9)         | 0.1973 | two-way ANOVA analysis followed by Tukey's post-hoc multi-comparison test |                                 |                                 |
|    | ASPP1(KO)+Sham (n=9)  | 0.5715 |                                                                           | P=0.999955876 vs WT+Sham        |                                 |
|    | WT+I/R (n=9)          | 0.6686 |                                                                           | P=1.01E-13 vs WT+Sham           |                                 |
|    | ASPP1(KO)+I/R (n=9)   | 0.1669 |                                                                           | P=1.01E-13 vs ASPP1(KO)+Sham    |                                 |
|    |                       |        |                                                                           |                                 | P=1.09793E-08 vs WT+Sham        |
|    |                       |        |                                                                           |                                 | P=1.25251E-08 vs ASPP1(KO)+Sham |
|    |                       |        |                                                                           |                                 | P=1.10357E-08 vs WT+I/R         |
| 5F | WT+Sham               | 0.5828 | two-way ANOVA                                                             |                                 |                                 |



|    |                  |                      |        |                                                                                     |                                    |
|----|------------------|----------------------|--------|-------------------------------------------------------------------------------------|------------------------------------|
|    |                  | (n=9)                |        | analysis followed by<br>Tukey's post-hoc multi-<br>comparison test                  |                                    |
|    |                  | ASPP1(KO)+Sham (n=9) | 0.7786 |                                                                                     | P=0.960849952 vs<br>WT+Sham        |
|    |                  | WT+I/R (n=9)         | 0.2676 |                                                                                     | P=3.38E-13 vs<br>WT+Sham           |
|    |                  | ASPP1(KO)+I/R (n=9)  | 0.9520 |                                                                                     | P=7.63E-13 vs<br>ASPP1(KO)+Sham    |
|    |                  |                      |        |                                                                                     | P=0.000632509 vs<br>WT+Sham        |
|    |                  |                      |        |                                                                                     | P=0.002459429 vs<br>ASPP1(KO)+Sham |
|    |                  |                      |        |                                                                                     | P=7.68615E-09 vs<br>WT+I/R         |
| 5G | Bcl-2            | WT+Sham (n=6)        | 0.9953 | two-way ANOVA<br>analysis followed by<br>Tukey's post-hoc multi-<br>comparison test |                                    |
|    |                  | ASPP1(KO)+Sham (n=6) | 0.1698 |                                                                                     | P=0.895610801 vs<br>WT+Sham        |
|    |                  | WT+I/R (n=6)         | 0.4118 |                                                                                     | P=0.002780918 vs<br>WT+Sham        |
|    |                  | ASPP1(KO)+I/R (n=6)  | 0.8479 |                                                                                     | P=0.000562676 vs<br>ASPP1(KO)+Sham |
|    |                  |                      |        |                                                                                     | P=0.993548953 vs<br>WT+Sham        |
|    |                  |                      |        |                                                                                     | P=0.970899958 vs<br>ASPP1(KO)+Sham |
|    |                  |                      |        |                                                                                     | P=0.001532373 vs<br>WT+I/R         |
| 5H | Bax              | WT+Sham (n=6)        | 0.3658 | two-way ANOVA<br>analysis followed by<br>Tukey's post-hoc multi-<br>comparison test |                                    |
|    |                  | ASPP1(KO)+Sham (n=6) | 0.9307 |                                                                                     | P=0.999881886 vs<br>WT+Sham        |
|    |                  | WT+I/R (n=6)         | 0.4310 |                                                                                     | P=1.18067E-08 vs<br>WT+Sham        |
|    |                  | ASPP1(KO)+I/R (n=6)  | 0.1012 |                                                                                     | P=1.05531E-08 vs<br>ASPP1(KO)+Sham |
|    |                  |                      |        |                                                                                     | P=0.672950935 vs<br>WT+Sham        |
|    |                  |                      |        |                                                                                     | P=0.632018157 vs<br>ASPP1(KO)+Sham |
|    |                  |                      |        |                                                                                     | P=8.25844E-08 vs<br>WT+I/R         |
| 5I | Total p53 levels | WT+Sham (n=5)        | 0.4536 | Kruskal Wallis test with<br>FDR (Benjamini-<br>Hochberg method)                     |                                    |
|    |                  | ASPP1(KO)+Sham (n=5) | 0.4068 |                                                                                     | P=0.708281012 vs<br>WT+Sham        |
|    |                  | WT+I/R (n=5)         | 0.9847 |                                                                                     | P=0.032509445 vs<br>WT+Sham        |

|    |                             |                      |        |                                                                           |                                 |                                 |
|----|-----------------------------|----------------------|--------|---------------------------------------------------------------------------|---------------------------------|---------------------------------|
|    |                             |                      |        |                                                                           | P=0.011996214 vs ASPP1(KO)+Sham |                                 |
|    |                             | ASPP1(KO)+I/R (n=5)  | 0.4668 |                                                                           | P=0.004611783 vs WT+Sham        |                                 |
|    |                             |                      |        |                                                                           | P=0.001340641 vs ASPP1(KO)+Sham |                                 |
|    |                             |                      |        |                                                                           | P=0.487130991 vs WT+I/R         |                                 |
|    | p53 nuclear/cytoplasm ratio | WT+Sham (n=5)        | 0.8126 | Kruskal Wallis test with FDR (Benjamini-Hochberg method)                  |                                 |                                 |
|    |                             | ASPP1(KO)+Sham (n=5) | 0.1154 |                                                                           |                                 | P=0.830696011 vs WT+Sham        |
|    |                             | WT+I/R (n=5)         | 0.6613 |                                                                           |                                 | P=0.005443982 vs WT+Sham        |
|    |                             | ASPP1(KO)+I/R (n=5)  | 0.3563 |                                                                           |                                 | P=0.002759549 vs ASPP1(KO)+Sham |
|    |                             |                      |        |                                                                           | P=0.592980098 vs WT+Sham        |                                 |
|    |                             |                      |        |                                                                           | P=0.454260243 vs ASPP1(KO)+Sham |                                 |
|    |                             |                      |        |                                                                           | P=0.02476849 vs WT+I/R          |                                 |
| 6A |                             | NC (n=5)             | 0.1294 | Mann-Whitney <i>U</i> test                                                |                                 |                                 |
|    |                             | siASPP1-1 (n=5)      | 0.1466 |                                                                           |                                 | P=0.420634920634921 vs NC       |
|    |                             | siASPP1-2 (n=5)      | 0.1541 |                                                                           |                                 | P=0.222222222222222 vs NC       |
|    |                             | siASPP1-3 (n=5)      | 0.5071 |                                                                           |                                 | P=0.007936507936508 vs NC       |
| 6B |                             | Control (n=6)        | 0.9741 | one-way ANOVA analysis followed by Tukey's post-hoc multi-comparison test |                                 |                                 |
|    |                             | H/R (n=6)            | 0.1750 |                                                                           |                                 | P=2.3E-14 vs Control            |
|    |                             | H/R+NC (n=6)         | 0.7532 |                                                                           |                                 | P=2.3E-14 vs Control            |
|    |                             |                      |        |                                                                           |                                 | P=0.992822613 vs H/R            |
|    |                             | H/R+siASPP1 (n=6)    | 0.7040 |                                                                           |                                 | P=0.001460505 vs Control        |
|    |                             |                      |        |                                                                           | P=2.5E-14 vs H/R                |                                 |
|    |                             |                      |        |                                                                           | P=2.5E-14 vs H/R+NC             |                                 |
| 6C |                             | Control (n=6)        | 0.8078 | one-way ANOVA analysis followed by Tukey's post-hoc multi-comparison test |                                 |                                 |
|    |                             | H/R (n=6)            | 0.5302 |                                                                           |                                 | P=5.02505E-09 vs Control        |
|    |                             | H/R+NC (n=6)         | 0.2386 |                                                                           |                                 | P=3.40611E-09 vs Control        |
|    |                             |                      |        |                                                                           |                                 | P=0.994585774 vs H/R            |
|    |                             | H/R+siASPP1 (n=6)    | 0.1536 |                                                                           | P=0.046337371 vs Control        |                                 |
|    |                             |                      |        |                                                                           | P=7.28987E-07 vs H/R            |                                 |

|    |  |                   |        |                                                                           |                                |
|----|--|-------------------|--------|---------------------------------------------------------------------------|--------------------------------|
|    |  |                   |        |                                                                           | P=4.55034E-07 vs H/R+NC        |
| 6D |  | Control (n=6)     | 0.8956 | one-way ANOVA analysis followed by Tukey's post-hoc multi-comparison test |                                |
|    |  | H/R (n=6)         | 0.8940 |                                                                           | P=1.086E-12 vs Control         |
|    |  | H/R+NC (n=6)      | 0.7722 |                                                                           | P=1.071E-12 vs Control         |
|    |  | H/R+siASPP1 (n=6) | 0.7299 |                                                                           | P=0.9999926 vs H/R             |
|    |  |                   |        |                                                                           | P=5.83639E-05 vs Control       |
|    |  |                   |        |                                                                           | P=1.96033E-09 vs H/R           |
|    |  |                   |        |                                                                           | P=1.92296E-09 vs H/R+NC        |
| 6E |  | Control (n=6)     | 0.2446 | one-way ANOVA analysis followed by Tukey's post-hoc multi-comparison test |                                |
|    |  | H/R (n=6)         | 0.3123 |                                                                           | P=2.08378E-08 vs Control       |
|    |  | H/R+NC (n=6)      | 0.8922 |                                                                           | P=1.82358E-09 vs Control       |
|    |  | H/R+siASPP1 (n=6) | 0.1606 |                                                                           | P=0.445911189 vs H/R           |
|    |  |                   |        |                                                                           | P=0.054063753 vs Control       |
|    |  |                   |        |                                                                           | P=3.50581E-06 vs H/R           |
|    |  |                   |        |                                                                           | P=1.85878E-07 vs H/R+NC        |
| 6F |  | Control (n=5)     | 0.5790 | Kruskal Wallis test with FDR (Benjamini-Hochberg method)                  |                                |
|    |  | H/R (n=5)         | 0.3946 |                                                                           | P=0.020593097944251 vs Control |
|    |  | H/R+NC (n=5)      | 0.3312 |                                                                           | P=0.009673458033440 vs Control |
|    |  | H/R+siASPP1 (n=5) | 0.7611 |                                                                           | P=0.667859103735774 vs H/R     |
|    |  |                   |        |                                                                           | P=0.708281012290605 vs Control |
|    |  |                   |        |                                                                           | P=0.042618870899495 vs H/R     |
|    |  |                   |        |                                                                           | P=0.016331945415615 vs H/R+NC  |
| 6G |  | Control (n=5)     | 0.9964 | Kruskal Wallis test with FDR (Benjamini-Hochberg method)                  |                                |
|    |  | H/R (n=5)         | 0.1571 |                                                                           | P=0.001933702 vs Control       |
|    |  | H/R+NC (n=5)      | 0.2645 |                                                                           | P=0.008814655 vs Control       |
|    |  | H/R+siASPP1 (n=5) | 0.7379 |                                                                           | P=0.630466582 vs H/R           |
|    |  |                   |        |                                                                           | P=0.708281012 vs Control       |
|    |  |                   |        |                                                                           | P=0.006409444 vs H/R           |
|    |  |                   |        |                                                                           | P=0.02476849 vs H/R+NC         |

|    |                         |        |                                                                           |                                   |
|----|-------------------------|--------|---------------------------------------------------------------------------|-----------------------------------|
| 7A | NC (n=5)                | 0.8589 | Mann-Whitney <i>U</i> test                                                |                                   |
|    | sip53-1 (n=5)           | 0.0844 |                                                                           | P=0.007936507936508 vs NC         |
|    | sip53-2 (n=5)           | 0.2195 |                                                                           | P=0.031746031746032 vs NC         |
|    | sip53-3 (n=5)           | 0.1345 |                                                                           | P=0.007936507936508 vs NC         |
| 7B | H/R+NC (n=9)            | 0.0623 | one-way ANOVA analysis followed by Tukey's post-hoc multi-comparison test |                                   |
|    | H/R+ASPP1 (n=9)         | 0.4674 |                                                                           | P=2.85061E-10 vs H/R+NC           |
|    | H/R+ASPP1+si CTRL (n=9) | 0.4920 |                                                                           | P=1.92158E-08 vs H/R+NC           |
|    | H/R+ASPP1+si p53 (n=9)  | 0.1152 |                                                                           | P=0.378632861 vs H/R+ASPP1        |
|    |                         |        |                                                                           | P=0.918781982 vs H/R+NC           |
|    |                         |        |                                                                           | P=6.0045E-11 vs H/R+ASPP1         |
|    |                         |        |                                                                           | P=3.53424E-09 vs H/R+ASPP1+siCTRL |
| 7C | H/R+NC (n=5)            | 0.3365 | Kruskal Wallis test with FDR (Benjamini-Hochberg method)                  |                                   |
|    | H/R+ASPP1 (n=5)         | 0.1790 |                                                                           | P=0.008814655 vs H/R+NC           |
|    | H/R+ASPP1+si CTRL (n=5) | 0.8961 |                                                                           | P=0.02476849 vs H/R+NC            |
|    | H/R+ASPP1+si p53 (n=5)  | 0.4676 |                                                                           | P=0.708281012 vs H/R+ASPP1        |
|    |                         |        |                                                                           | P=0.630466582 vs H/R+NC           |
|    |                         |        |                                                                           | P=0.001933702 vs H/R+ASPP1        |
|    |                         |        |                                                                           | P=0.006409444 vs H/R+ASPP1+siCTRL |
| 7D | H/R+NC (n=6)            | 0.5123 | one-way ANOVA analysis followed by Tukey's post-hoc multi-comparison test |                                   |
|    | H/R+ASPP1 (n=6)         | 0.7256 |                                                                           | P=2.6032E-05 vs H/R+NC            |
|    | H/R+ASPP1+si CTRL (n=6) | 0.6741 |                                                                           | P=2.57442E-06 vs H/R+NC           |
|    | H/R+ASPP1+si p53 (n=6)  | 0.2483 |                                                                           | P=0.687786762 vs H/R+ASPP1        |
|    |                         |        |                                                                           | P=0.059018853 vs H/R+NC           |
|    |                         |        |                                                                           | P=1.19602E-07 vs H/R+ASPP1        |
|    |                         |        |                                                                           | P=1.73435E-08 vs H/R+ASPP1+siCTRL |
| 7E | H/R+NC (n=6)            | 0.9905 | one-way ANOVA                                                             |                                   |

|    |  |                                    |        |                                                                                     |                                                                                                     |
|----|--|------------------------------------|--------|-------------------------------------------------------------------------------------|-----------------------------------------------------------------------------------------------------|
|    |  | H/R+ASPP1<br>(n=6)                 | 0.5199 | analysis followed by<br>Tukey's post-hoc multi-<br>comparison test                  | P=1.10156E-06 vs<br>H/R+NC                                                                          |
|    |  | H/R+ASPP1+si<br>CTRL (n=6)         | 0.9617 |                                                                                     | P=3.83275E-06 vs<br>H/R+NC                                                                          |
|    |  | H/R+ASPP1+si<br>p53 (n=6)          | 0.1651 |                                                                                     | P=0.563072735 vs<br>H/R+ASPP1                                                                       |
|    |  |                                    |        |                                                                                     | P=0.483310244 vs<br>H/R+NC<br>P=5.03802E-06 vs<br>H/R+ASPP1<br>P=1.84754E-05 vs<br>H/R+ASPP1+siCTRL |
| 7F |  | H/R+NC (n=6)                       | 0.0740 | one-way ANOVA<br>analysis followed by<br>Tukey's post-hoc multi-<br>comparison test |                                                                                                     |
|    |  | H/R+ASPP1<br>(n=6)                 | 0.9345 |                                                                                     | P=2.60397E-08 vs<br>H/R+NC                                                                          |
|    |  | H/R+ASPP1+si<br>CTRL (n=6)         | 0.3855 |                                                                                     | P=4.42156E-07 vs<br>H/R+NC<br>P=0.414266597 vs<br>H/R+ASPP1                                         |
|    |  | H/R+ASPP1+si<br>p53 (n=6)          | 0.1799 |                                                                                     | P=0.533421157 vs<br>H/R+NC<br>P=2.98585E-07 vs<br>H/R+ASPP1<br>P=6.67017E-06 vs<br>H/R+ASPP1+siCTRL |
| 7J |  | H/R+NC (n=6)                       | 0.5795 | one-way ANOVA<br>analysis followed by<br>Tukey's post-hoc multi-<br>comparison test |                                                                                                     |
|    |  | H/R+ASPP1<br>(n=6)                 | 0.5605 |                                                                                     | P=2.38136E-10 vs<br>H/R+NC                                                                          |
|    |  | H/R+ASPP1+N<br>C(n=6)              | 0.0969 |                                                                                     | P=7.9355E-11 vs<br>H/R+NC<br>P=0.973265273 vs<br>H/R+ASPP1                                          |
|    |  | H/R+ASPP1+Fl<br>ag-p53-NT<br>(n=6) | 0.1157 |                                                                                     | P=0.004158301 vs<br>H/R+NC<br>P=1.05659E-06 vs<br>H/R+ASPP1                                         |
|    |  | H/R+ASPP1+Fl<br>ag-p53-CT<br>(n=6) | 0.5600 |                                                                                     | P=2.6117E-07 vs<br>H/R+ASPP1+NC<br>P=1.38582E-10 vs<br>H/R+NC<br>P=0.998244607 vs<br>H/R+ASPP1      |
|    |  |                                    |        |                                                                                     | P=0.997885494 vs<br>H/R+ASPP1+NC<br>P=5.31091E-07 vs<br>H/R+ASPP1+Flag-p53-<br>NT                   |
|    |  |                                    |        |                                                                                     |                                                                                                     |
|    |  |                                    |        |                                                                                     |                                                                                                     |

|    |                             |        |                                                                           |                            |
|----|-----------------------------|--------|---------------------------------------------------------------------------|----------------------------|
| 7K | H/R+NC (n=6)                | 0.1228 | one-way ANOVA analysis followed by Tukey's post-hoc multi-comparison test |                            |
|    | H/R+ASPP1 (n=6)             | 0.9127 |                                                                           | P=1.07415E-10 vs H/R+NC    |
|    | H/R+ASPP1+NC (n=6)          | 0.1655 |                                                                           | P=2.8411E-11 vs H/R+NC     |
|    |                             |        |                                                                           | P=0.941658765 vs H/R+ASPP1 |
|    | H/R+ASPP1+Flag-p53-NT (n=6) | 0.2550 |                                                                           | P=0.998126582 vs H/R+NC    |
|    |                             |        |                                                                           | P=1.85408E-10 vs H/R+ASPP1 |
|    |                             |        | P=4.7901E-11 vs H/R+ASPP1+NC                                              |                            |
|    |                             |        | P=1.79297E-10 vs H/R+NC                                                   |                            |
|    |                             |        | P=0.998534455 vs H/R+ASPP1                                                |                            |
|    |                             |        | P=0.837443419 vs H/R+ASPP1+NC                                             |                            |
|    |                             |        | P=3.12431E-10 vs H/R+ASPP1+Flag-p53-NT                                    |                            |
| 7L | H/R+NC (n=6)                | 0.5218 | one-way ANOVA analysis followed by Tukey's post-hoc multi-comparison test |                            |
|    | H/R+ASPP1 (n=6)             | 0.6630 |                                                                           | P=1.76761E-09 vs H/R+NC    |
|    | H/R+ASPP1+NC (n=6)          | 0.9722 |                                                                           | P=1.17218E-09 vs H/R+NC    |
|    |                             |        |                                                                           | P=0.999545617 vs H/R+ASPP1 |
|    | H/R+ASPP1+Flag-p53-NT (n=6) | 0.4472 |                                                                           | P=0.998755172 vs H/R+NC    |
|    |                             |        |                                                                           | P=1.0409E-09 vs H/R+ASPP1  |
|    |                             |        | P=6.94997E-10 vs H/R+ASPP1+NC                                             |                            |
|    |                             |        | P=2.74926E-10 vs H/R+NC                                                   |                            |
|    |                             |        | P=0.866652486 vs H/R+ASPP1                                                |                            |
|    |                             |        | P=0.93971395 vs H/R+ASPP1+NC                                              |                            |
|    |                             |        | P=1.66984E-10 vs H/R+ASPP1+Flag-p53-NT                                    |                            |
| 7M | H/R+NC (n=6)                | 0.3079 | one-way ANOVA analysis followed by Tukey's post-hoc multi-                |                            |
|    | H/R+ASPP1 (n=6)             | 0.2336 |                                                                           | P=9.38838E-10 vs H/R+NC    |

|    |    |                                       |        |                                                                                     |                                   |
|----|----|---------------------------------------|--------|-------------------------------------------------------------------------------------|-----------------------------------|
|    |    | H/R+ASPP1+N<br>C(n=6)                 | 0.6420 | comparison test                                                                     | P=2.55664E-10 vs<br>H/R+NC        |
|    |    | H/R+ASPP1+Fl<br>ag-p53-NT<br>(n=6)    | 0.2790 |                                                                                     | P=0.957972031 vs<br>H/R+ASPP1     |
|    |    | H/R+ASPP1+Fl<br>ag-p53-CT<br>(n=6)    | 0.5381 |                                                                                     | P=0.464533339 vs<br>H/R+NC        |
|    |    |                                       |        |                                                                                     | P=2.90196E-08 vs<br>H/R+ASPP1     |
|    |    |                                       |        |                                                                                     | P=6.86022E-09 vs<br>H/R+ASPP1+NC  |
|    |    |                                       |        |                                                                                     | P=1.06292E-10 vs<br>H/R+NC        |
|    |    |                                       |        |                                                                                     | P=0.771385461 vs<br>H/R+ASPP1     |
|    |    |                                       |        | P=0.988610037 vs<br>H/R+ASPP1+NC                                                    |                                   |
|    |    |                                       |        | P=2.59095E-09 vs<br>H/R+ASPP1+Flag-p53-<br>NT                                       |                                   |
| 8A |    | AAV9-NC<br>(n=6)                      | 0.1498 | nonpaired 2-tailed<br>Student <i>t</i> test                                         |                                   |
|    |    | AAV9-shp53<br>(n=6)                   | 0.7941 |                                                                                     | P=7.08908E-07 vs<br>AAV9-NC       |
| 8B | EF | WT+I/R (n=7)                          | 0.0964 | one-way ANOVA<br>analysis followed by<br>Tukey's post-hoc multi-<br>comparison test |                                   |
|    |    | ASPP1(TG)+I/<br>R (n=7)               | 0.4951 |                                                                                     | P=7.26293E-09 vs<br>WT+I/R        |
|    |    | ASPP1(TG)+I/<br>R+AAV9-NC<br>(n=7)    | 0.2942 |                                                                                     | P=2.74458E-09 vs<br>WT+I/R        |
|    |    | ASPP1(TG)+I/<br>R+AAV9-shp53<br>(n=7) | 0.2942 |                                                                                     | P=0.96010774 vs<br>ASPP1(TG)+I/R  |
|    |    |                                       |        |                                                                                     | P=0.808847929 vs<br>WT+I/R        |
|    |    |                                       |        | P=1.2712E-09 vs<br>ASPP1(TG)+I/R                                                    |                                   |
|    |    |                                       |        | P=5.06677E-10 vs<br>ASPP1(TG)+I/R+AAV9-<br>NC                                       |                                   |
|    | FS | WT+I/R (n=7)                          | 0.1602 | one-way ANOVA<br>analysis followed by<br>Tukey's post-hoc multi-<br>comparison test |                                   |
|    |    | ASPP1(TG)+I/<br>R (n=7)               | 0.3785 |                                                                                     | P=7.27796E-09 vs<br>WT+I/R        |
|    |    | ASPP1(TG)+I/<br>R+AAV9-NC<br>(n=7)    | 0.3644 |                                                                                     | P=3.16924E-09 vs<br>WT+I/R        |
|    |    | ASPP1(TG)+I/<br>R+AAV9-shp53<br>(n=7) | 0.4521 |                                                                                     | P=0.974620984 vs<br>ASPP1(TG)+I/R |
|    |    |                                       |        | P=0.737030875 vs<br>WT+I/R                                                          |                                   |
|    |    |                                       |        | P=9.9234E-10 vs                                                                     |                                   |

|    |  |                                 |        |                                                                           |                                        |
|----|--|---------------------------------|--------|---------------------------------------------------------------------------|----------------------------------------|
|    |  |                                 |        |                                                                           | ASPP1(TG)+I/R                          |
|    |  |                                 |        |                                                                           | P=4.55216E-10 vs ASPP1(TG)+I/R+AAV9-NC |
| 8C |  | WT+I/R (n=6)                    | 0.4521 | one-way ANOVA analysis followed by Tukey's post-hoc multi-comparison test |                                        |
|    |  | ASPP1(TG)+I/R (n=6)             | 0.6009 |                                                                           | P=1.69895E-06 vs WT+I/R                |
|    |  | ASPP1(TG)+I/R+AAV9-NC (n=6)     | 0.5927 |                                                                           | P=1.54881E-06 vs WT+I/R                |
|    |  | ASPP1(TG)+I/R+AAV9-shp53 (n=6)  | 0.9370 |                                                                           | P=0.999962242 vs ASPP1(TG)+I/R         |
|    |  |                                 |        |                                                                           | P=0.193897363 vs WT+I/R                |
|    |  |                                 |        |                                                                           | P=3.60309E-08 vs ASPP1(TG)+I/R         |
|    |  |                                 |        |                                                                           | P=3.32505E-08 vs ASPP1(TG)+I/R+AAV9-NC |
| 8D |  | WT+I/R (n=10)                   | 0.7606 | one-way ANOVA analysis followed by Tukey's post-hoc multi-comparison test |                                        |
|    |  | ASPP1(TG)+I/R (n=10)            | 0.6424 |                                                                           | P=1.6958E-08 vs WT+I/R                 |
|    |  | ASPP1(TG)+I/R+AAV9-NC (n=10)    | 0.7573 |                                                                           | P=3.27491E-08 vs WT+I/R                |
|    |  | ASPP1(TG)+I/R+AAV9-shp53 (n=10) | 0.8147 |                                                                           | P=0.99600497 vs ASPP1(TG)+I/R          |
|    |  |                                 |        |                                                                           | P=0.97053238 vs WT+I/R                 |
|    |  |                                 |        |                                                                           | P=4.66523E-09 vs ASPP1(TG)+I/R         |
|    |  |                                 |        |                                                                           | P=8.91365E-09 vs ASPP1(TG)+I/R+AAV9-NC |
| 8E |  | WT+I/R (n=10)                   | 0.3230 | one-way ANOVA analysis followed by Tukey's post-hoc multi-comparison test |                                        |
|    |  | ASPP1(TG)+I/R (n=10)            | 0.4801 |                                                                           | P=1E-15 vs WT+I/R                      |
|    |  | ASPP1(TG)+I/R+AAV9-NC (n=10)    | 0.4691 |                                                                           | P=1E-15 vs WT+I/R                      |
|    |  | ASPP1(TG)+I/R+AAV9-shp53 (n=10) | 0.5987 |                                                                           | P=0.999940913 vs ASPP1(TG)+I/R         |
|    |  |                                 |        |                                                                           | P=0.996316226 vs WT+I/R                |
|    |  |                                 |        |                                                                           | P<1E-15 vs ASPP1(TG)+I/R               |
|    |  |                                 |        |                                                                           | P<1E-15 vs ASPP1(TG)+I/R+AAV9-NC       |
| 8F |  | WT+I/R (n=10)                   | 0.0558 | one-way ANOVA analysis followed by                                        |                                        |
|    |  | ASPP1(TG)+I/R                   | 0.3860 |                                                                           | P=7.372E-12 vs WT+I/R                  |



|    |                         |                                 |        |                                                                           |                                          |
|----|-------------------------|---------------------------------|--------|---------------------------------------------------------------------------|------------------------------------------|
|    |                         | R (n=10)                        |        | Tukey's post-hoc multi-comparison test                                    |                                          |
|    |                         | ASPP1(TG)+I/R+AAV9-NC (n=10)    | 0.7834 |                                                                           | P=2.7912E-11 vs WT+I/R                   |
|    |                         | ASPP1(TG)+I/R+AAV9-shp53 (n=10) | 0.1812 |                                                                           | P=0.958881181 vs ASPP1(TG)+I/R           |
|    |                         |                                 |        |                                                                           | P=0.801594243 vs WT+I/R                  |
|    |                         |                                 |        |                                                                           | P=5.19E-13 vs ASPP1(TG)+I/R              |
|    |                         |                                 |        |                                                                           | P=2.432E-12 vs ASPP1(TG)+I/R+AAV9-NC     |
| 8G |                         | WT+I/R (n=6)                    | 0.1142 | one-way ANOVA analysis followed by Tukey's post-hoc multi-comparison test |                                          |
|    |                         | ASPP1(TG)+I/R (n=6)             | 0.7255 |                                                                           | P=1.86062E-06 vs WT+I/R                  |
|    |                         | ASPP1(TG)+I/R+AAV9-NC (n=6)     | 0.2360 |                                                                           | P=2.67081E-06 vs WT+I/R                  |
|    |                         | ASPP1(TG)+I/R+AAV9-shp53 (n=6)  | 0.1402 |                                                                           | P=0.997846099 vs ASPP1(TG)+I/R           |
|    |                         |                                 |        |                                                                           | P=0.457621629 vs WT+I/R                  |
|    |                         |                                 |        |                                                                           | P=1.08916E-07 vs ASPP1(TG)+I/R           |
|    |                         |                                 |        |                                                                           | P=1.51002E-07 vs ASPP1(TG)+I/R+AAV9-NC   |
| 8H |                         | WT+I/R (n=6)                    | 0.7192 | one-way ANOVA analysis followed by Tukey's post-hoc multi-comparison test |                                          |
|    |                         | ASPP1(TG)+I/R (n=6)             | 0.9644 |                                                                           | P=2.44309E-06 vs WT+I/R                  |
|    |                         | ASPP1(TG)+I/R+AAV9-NC (n=6)     | 0.1834 |                                                                           | P=4.61814E-07 vs WT+I/R                  |
|    |                         | ASPP1(TG)+I/R+AAV9-shp53 (n=6)  | 0.5889 |                                                                           | P=0.828929203 vs ASPP1(TG)+I/R           |
|    |                         |                                 |        |                                                                           | P=0.980224569 vs WT+I/R                  |
|    |                         |                                 |        |                                                                           | P=5.33597E-06 vs ASPP1(TG)+I/R           |
|    |                         |                                 |        |                                                                           | P=9.66563E-07 vs ASPP1(TG)+I/R+AAV9-NC   |
| S1 | Total ASPP1 levels      | Non-ischemic area (n=5)         | 0.2926 | Mann-Whitney <i>U</i> test                                                |                                          |
|    |                         | Ischemic area (n=5)             | 0.0808 |                                                                           | P=0.007936507936508 vs Non-ischemic area |
|    | ASPP1 nuclear/cytoplasm | Non-ischemic area (n=5)         | 0.3337 | Mann-Whitney <i>U</i> test                                                |                                          |
|    |                         | Ischemic area                   | 0.9445 |                                                                           | P=0.007936507936508                      |

|      |                             |                         |                                |                                                          |                                          |
|------|-----------------------------|-------------------------|--------------------------------|----------------------------------------------------------|------------------------------------------|
|      | ratio                       | (n=5)                   |                                |                                                          | vs Non-ischemic area                     |
|      | Total p53 levels            | Non-ischemic area (n=5) | 0.6728                         | Mann-Whitney <i>U</i> test                               |                                          |
|      |                             | Ischemic area (n=5)     | 0.7002                         |                                                          | P=0.007936507936508 vs Non-ischemic area |
|      | p53 nuclear/cytoplasm ratio | Non-ischemic area (n=5) | 0.8457                         | Mann-Whitney <i>U</i> test                               |                                          |
|      |                             | Ischemic area (n=5)     | 0.9890                         |                                                          | P=0.007936507936508 vs Non-ischemic area |
| S2 A | Total p63 levels            | NC (n=5)                | 0.8612                         | Kruskal Wallis test with FDR (Benjamini-Hochberg method) |                                          |
|      |                             | siASPP1 (n=5)           | 0.7951                         |                                                          | P=0.21892122 vs NC                       |
|      |                             | H/R+NC (n=5)            | 0.0322                         |                                                          | P=0.668929268 vs NC                      |
|      |                             |                         |                                |                                                          | P=0.422678074 vs siASPP1                 |
|      |                             | H/R+siASPP1 (n=5)       | 0.1940                         |                                                          | P=0.422678074 vs NC                      |
|      |                             |                         |                                |                                                          | P=0.668929268 vs siASPP1                 |
|      |                             |                         |                                |                                                          | P=0.708281012 vs H/R+NC                  |
|      | p63 nuclear/cytoplasm ratio | NC (n=5)                | 0.3196                         | Kruskal Wallis test with FDR (Benjamini-Hochberg method) |                                          |
|      |                             | siASPP1 (n=5)           | 0.6856                         |                                                          | P=0.199543244894338 vs NC                |
|      |                             | H/R+NC (n=5)            | 0.1339                         |                                                          | P=0.121113867656861 vs NC                |
|      |                             |                         | P=0.789268026134283 vs siASPP1 |                                                          |                                          |
|      |                             | H/R+siASPP1 (n=5)       | 0.5018                         |                                                          | P=0.630466581587966 vs NC                |
|      |                             |                         |                                | P=0.422678074170649 vs siASPP1                           |                                          |
|      |                             |                         |                                | P=0.285049407402629 vs H/R+NC                            |                                          |
| S2 B | Total p73 levels            | NC (n=5)                | 0.1580                         | Kruskal Wallis test with FDR (Benjamini-Hochberg method) |                                          |
|      |                             | siASPP1 (n=5)           | 0.2203                         |                                                          | P=0.422678074170649 vs NC                |
|      |                             | H/R+NC (n=5)            | 0.5674                         |                                                          | P=0.261651090588242 vs NC                |
|      |                             |                         |                                |                                                          | P=0.054319378127170 vs siASPP1           |
|      |                             | H/R+siASPP1 (n=5)       | 0.4028                         |                                                          | P=0.830696011306370 vs NC                |
|      |                             |                         |                                |                                                          | P=0.309823373372381 vs siASPP1           |
|      |                             |                         |                                |                                                          | P=0.363514722736453 vs H/R+NC            |
|      | p73                         | NC (n=5)                | 0.6926                         | Kruskal Wallis test with                                 |                                          |

|      |                                         |                                |        |                                             |                                   |
|------|-----------------------------------------|--------------------------------|--------|---------------------------------------------|-----------------------------------|
|      | nuclear/cyt<br>oplasm<br>ratio          | siASPP1 (n=5)                  | 0.8762 | FDR (Benjamini-<br>Hochberg method)         | P=0.285049407402629<br>vs NC      |
|      |                                         | H/R+NC (n=5)                   | 0.8146 |                                             | P=0.454260242566824<br>vs NC      |
|      |                                         | H/R+siASPP1<br>(n=5)           | 0.4451 |                                             | P=0.069159491941058<br>vs siASPP1 |
|      |                                         |                                |        |                                             | P=0.521245308114821<br>vs NC      |
|      |                                         |                                |        |                                             | P=0.668929268252769<br>vs siASPP1 |
|      |                                         |                                |        |                                             | P=0.164602236716164<br>vs H/R+NC  |
| S3 A | Total p53<br>levels                     | H/R+NC (n=5)                   | 0.1446 | Mann-Whitney <i>U</i> test                  |                                   |
|      |                                         | H/R+SiASPP2<br>(n=5)           | 0.6318 |                                             | P=0.547619047619048<br>vs H/R+NC  |
|      | p53<br>nuclear/cyt<br>oplasm<br>ratio   | H/R+NC (n=5)                   | 0.1742 | Mann-Whitney <i>U</i> test                  |                                   |
|      |                                         | H/R+SiASPP2<br>(n=5)           | 0.5772 |                                             | P=0.547619047619048<br>vs H/R+NC  |
| S3 B | Total p53<br>levels                     | H/R+NC (n=5)                   | 0.8086 | Mann-Whitney <i>U</i> test                  |                                   |
|      |                                         | H/R+SiiASPP<br>(n=5)           | 0.8029 |                                             | P=0.007936507936508<br>vs H/R+NC  |
|      | p53<br>nuclear/cyt<br>oplasm<br>ratio   | H/R+NC (n=5)                   | 0.5613 | Mann-Whitney <i>U</i> test                  |                                   |
|      |                                         | H/R+SiiASPP<br>(n=5)           | 0.2121 |                                             | P>0.999999999999999<br>vs H/R+NC  |
| S3 C | Total<br>ASPP2<br>levels                | H/R+NC (n=5)                   | 0.6547 | Mann-Whitney <i>U</i> test                  |                                   |
|      |                                         | H/R+Siimportin<br>-β1 (n=5)    | 0.6106 |                                             | P=0.309523809523810<br>vs H/R+NC  |
|      | ASPP2<br>nuclear/cyt<br>oplasm<br>ratio | H/R+NC (n=5)                   | 0.5830 | Mann-Whitney <i>U</i> test                  |                                   |
|      |                                         | H/R+Si<br>importin-β1<br>(n=5) | 0.6401 |                                             | P=0.547619047619048<br>vs H/R+NC  |
| S3 D | Total<br>iASPP<br>levels                | H/R+NC (n=5)                   | 0.0084 | Mann-Whitney <i>U</i> test                  |                                   |
|      |                                         | H/R+Siimportin<br>-β1 (n=5)    | 0.9961 |                                             | P=0.547619047619048<br>vs H/R+NC  |
|      | iASPP<br>nuclear/cyt<br>oplasm<br>ratio | H/R+NC (n=5)                   | 0.8803 | Mann-Whitney <i>U</i> test                  |                                   |
|      |                                         | H/R+Si<br>importin-β1<br>(n=5) | 0.7667 |                                             | P=0.841269841269841<br>vs H/R+NC  |
| S4 B | EF                                      | WT (n=14)                      | 0.1793 | nonpaired 2-tailed<br>Student <i>t</i> test |                                   |
|      |                                         | ASPP1(TG)<br>(n=20)            | 0.2993 |                                             | P=0.480531939433960<br>vs WT      |
|      | FS                                      | WT (n=14)                      | 0.0379 | Mann-Whitney <i>U</i> test                  |                                   |
|      |                                         | ASPP1(TG)<br>(n=20)            | 0.3679 |                                             | P=0.522479771269560<br>vs WT      |
| S4 C | Heart                                   | WT (n=6)                       | 0.8228 | nonpaired 2-tailed                          |                                   |

|      |                                     |                           |        |                                                                                     |                                |
|------|-------------------------------------|---------------------------|--------|-------------------------------------------------------------------------------------|--------------------------------|
|      | weight                              | ASPP1(TG)<br>(n=6)        | 0.4123 | Student <i>t</i> test                                                               | P=0.807272802009156<br>vs WT   |
|      | Body weight                         | WT (n=6)                  | 0.3561 | nonpaired 2-tailed                                                                  |                                |
|      |                                     | ASPP1(TG)<br>(n=6)        | 0.4245 | Student <i>t</i> test                                                               | P=0.591326096918382<br>vs WT   |
|      | Heart weight/body weight<br>(HW/BW) | WT (n=6)                  | 0.6636 | nonpaired 2-tailed                                                                  |                                |
|      |                                     | ASPP1(TG)<br>(n=6)        | 0.6200 | Student <i>t</i> test                                                               | P=0.946374698356178<br>vs WT   |
| S5 B | EF                                  | WT (n=9)                  | 0.1256 | nonpaired 2-tailed                                                                  |                                |
|      |                                     | ASPP1(KO)<br>(n=12)       | 0.8037 | Student <i>t</i> test                                                               | P=0.517412514137118<br>vs WT   |
|      | FS                                  | WT (n=9)                  | 0.0803 | nonpaired 2-tailed                                                                  |                                |
|      |                                     | ASPP1(KO)<br>(n=12)       | 0.6661 | Student <i>t</i> test                                                               | P=0.385036128965754<br>vs WT   |
| S5 C | Heart weight                        | WT (n=6)                  | 0.9735 | nonpaired 2-tailed                                                                  |                                |
|      |                                     | ASPP1(KO)<br>(n=6)        | 0.9948 | Student <i>t</i> test                                                               | P=0.901440144573029<br>vs WT   |
|      | Body weight,                        | WT (n=6)                  | 0.7287 | Mann-Whitney <i>U</i> test                                                          |                                |
|      |                                     | ASPP1(KO)<br>(n=6)        | 0.0221 |                                                                                     | P=0.816017316017316<br>vs WT   |
|      | Heart weight/body weight<br>(HW/BW) | WT (n=6)                  | 0.1607 | nonpaired 2-tailed                                                                  |                                |
|      |                                     | ASPP1(KO)<br>(n=6)        | 0.6737 | Student <i>t</i> test                                                               | P=0.969474465338486<br>vs WT   |
| S6 A |                                     | NC (n=6)                  | 0.3171 | nonpaired 2-tailed                                                                  |                                |
|      |                                     | p53 (n=6)                 | 0.7327 | Student <i>t</i> test                                                               | P=1.53196E-09 vs NC            |
| S6 B |                                     | H/R+siCTRL<br>(n=6)       | 0.2223 | one-way ANOVA<br>analysis followed by<br>Tukey's post-hoc multi-<br>comparison test |                                |
|      |                                     | H/R+siASPP1<br>(n=6)      | 0.0521 |                                                                                     | P=1.91774E-08 vs<br>H/R+siCTRL |
|      |                                     | H/R+siASPP1+<br>NC (n=6)  | 0.1215 |                                                                                     | P=1.21756E-07 vs<br>H/R+siCTRL |
|      |                                     | H/R+siASPP1+<br>p53 (n=6) | 0.3801 |                                                                                     | P=0.71705067 vs<br>H/R+siASPP1 |
|      |                                     |                           |        |                                                                                     | P=1.75269E-07 vs<br>H/R+siCTRL |
| S6 C |                                     | H/R+siCTRL<br>(n=6)       | 0.8832 | one-way ANOVA<br>analysis followed by<br>Tukey's post-hoc multi-<br>comparison test |                                |
|      |                                     | H/R+siASPP1<br>(n=6)      | 0.3306 |                                                                                     | P=9.20901E-08 vs<br>H/R+siCTRL |
|      |                                     | H/R+siASPP1+<br>NC (n=6)  | 0.0705 |                                                                                     | P=1.35861E-08 vs<br>H/R+siCTRL |

|      |  |                       |        |                                                                           |                                        |
|------|--|-----------------------|--------|---------------------------------------------------------------------------|----------------------------------------|
|      |  |                       |        |                                                                           | P=0.687113653 vs H/R+siASPP1           |
|      |  | H/R+siASPP1+p53 (n=6) | 0.5106 |                                                                           | P=3.62933E-07 vs H/R+siCTRL            |
|      |  |                       |        |                                                                           | P=0.876808818 vs H/R+siASPP1           |
|      |  |                       |        |                                                                           | P=0.276985155 vs H/R+siASPP1+p53       |
| S6 D |  | H/R+siCTRL (n=5)      | 0.9798 | Kruskal Wallis test with FDR (Benjamini-Hochberg method)                  |                                        |
|      |  | H/R+siASPP1 (n=5)     | 0.3890 |                                                                           | P=0.007526315166462 vs H/R+siCTRL      |
|      |  | H/R+siASPP1+NC (n=5)  | 0.2819 |                                                                           | P=0.010296548972126 vs H/R+siCTRL      |
|      |  | H/R+siASPP1+p53 (n=5) | 0.7094 |                                                                           | P=0.914864745735549 vs H/R+siASPP1     |
|      |  |                       |        |                                                                           | P=0.005443981805205 vs H/R+siCTRL      |
|      |  |                       |        |                                                                           | P=0.914864745735549 vs H/R+siASPP1     |
|      |  |                       |        |                                                                           | P=0.830696011306370 vs H/R+siASPP1+p53 |
| S6 E |  | H/R+siCTRL (n=5)      | 0.8456 | Kruskal Wallis test with FDR (Benjamini-Hochberg method)                  |                                        |
|      |  | H/R+siASPP1 (n=5)     | 0.6650 |                                                                           | P=0.028412580599663 vs H/R+siCTRL      |
|      |  | H/R+siASPP1+NC (n=5)  | 0.9171 |                                                                           | P=0.003896500435959 vs H/R+siCTRL      |
|      |  | H/R+siASPP1+p53 (n=5) | 0.3862 |                                                                           | P=0.487130990687863 vs H/R+siASPP1     |
|      |  |                       |        |                                                                           | P=0.003283460986070 vs H/R+siCTRL      |
|      |  |                       |        |                                                                           | P=0.454260242566823 vs H/R+siASPP1     |
|      |  |                       |        |                                                                           | P=0.957371576490613 vs H/R+siASPP1+p53 |
| S7 A |  | NC (n=5)              | 0.7107 | Mann-Whitney <i>U</i> test                                                |                                        |
|      |  | sip63-1 (n=5)         | 0.5432 |                                                                           | P=0.309523809523810 vs NC              |
|      |  | sip63-2 (n=5)         | 0.4107 |                                                                           | P=0.007936507936508 vs NC              |
|      |  | sip63-3 (n=5)         | 0.2928 |                                                                           | P=0.031746031746032 vs NC              |
| S7 B |  | H/R+NC (n=6)          | 0.7740 | one-way ANOVA analysis followed by Tukey's post-hoc multi-comparison test |                                        |
|      |  | H/R+ASPP1 (n=6)       | 0.9736 |                                                                           | P=1.967E-12 vs H/R+NC                  |
|      |  | H/R+ASPP1+si          | 0.8743 |                                                                           | P=8.287E-12 vs H/R+NC                  |

|      |  |                            |        |                                                                                     |                                            |
|------|--|----------------------------|--------|-------------------------------------------------------------------------------------|--------------------------------------------|
|      |  | CTRL (n=6)                 |        |                                                                                     | P=0.610792960863232<br>vs H/R+ASPP1        |
|      |  | H/R+ASPP1+si<br>p63 (n=6)  | 0.4067 |                                                                                     | P=1.0805E-11 vs<br>H/R+NC                  |
|      |  |                            |        |                                                                                     | P=0.478230690462547<br>vs H/R+ASPP1        |
|      |  |                            |        |                                                                                     | P=0.995969851341333<br>vs H/R+ASPP1+siCTRL |
| S7 C |  | H/R+NC (n=6)               | 0.6125 | one-way ANOVA<br>analysis followed by<br>Tukey's post-hoc multi-<br>comparison test |                                            |
|      |  | H/R+ASPP1<br>(n=6)         | 0.1822 |                                                                                     | P=9.65924E-07 vs<br>H/R+NC                 |
|      |  | H/R+ASPP1+si<br>CTRL (n=6) | 0.6999 |                                                                                     | P=3.93556E-06 vs<br>H/R+NC                 |
|      |  | H/R+ASPP1+si<br>p63 (n=6)  | 0.3477 |                                                                                     | P=0.894283894086269<br>vs H/R+ASPP1        |
|      |  |                            |        |                                                                                     | P=3.94909E-08 vs<br>H/R+NC                 |
|      |  |                            |        |                                                                                     | P=0.330687551391404<br>vs H/R+ASPP1        |
|      |  |                            |        |                                                                                     | P=0.100852016726795<br>vs H/R+ASPP1+siCTRL |
| S7 D |  | H/R+NC (n=5)               | 0.2759 | Kruskal Wallis test with<br>FDR (Benjamini-<br>Hochberg method)                     |                                            |
|      |  | H/R+ASPP1<br>(n=5)         | 0.8245 |                                                                                     | P=0.006409443948789<br>vs H/R+NC           |
|      |  | H/R+ASPP1+si<br>CTRL (n=5) | 0.5411 |                                                                                     | P=0.013940092260532<br>vs H/R+NC           |
|      |  | H/R+ASPP1+si<br>p63 (n=5)  | 0.5998 |                                                                                     | P=0.789268026134283<br>vs H/R+ASPP1        |
|      |  |                            |        |                                                                                     | P=0.004611783449109<br>vs H/R+NC           |
|      |  |                            |        |                                                                                     | P=0.914864745735550<br>vs H/R+ASPP1        |
|      |  |                            |        |                                                                                     | P=0.708281012290605<br>vs H/R+ASPP1+siCTRL |
| S7 E |  | H/R+NC (n=5)               | 0.5430 | Kruskal Wallis test with<br>FDR (Benjamini-<br>Hochberg method)                     |                                            |
|      |  | H/R+ASPP1<br>(n=5)         | 0.2189 |                                                                                     | P=0.011996214124711<br>vs H/R+NC           |
|      |  | H/R+ASPP1+si<br>CTRL (n=5) | 0.6893 |                                                                                     | P=0.002759548935304<br>vs H/R+NC           |
|      |  | H/R+ASPP1+si<br>p63 (n=5)  | 0.1430 |                                                                                     | P=0.630466581587966<br>vs H/R+ASPP1        |
|      |  |                            |        |                                                                                     | P=0.011996214124711<br>vs H/R+NC           |
|      |  |                            |        |                                                                                     | P>0.999999999999999<br>vs H/R+ASPP1        |
|      |  |                            |        |                                                                                     | P=0.630466581587966                        |

|      |  |                            |        |                                                                                     |                                     |
|------|--|----------------------------|--------|-------------------------------------------------------------------------------------|-------------------------------------|
|      |  |                            |        |                                                                                     | vs H/R+ASPP1+siCTRL                 |
| S7 F |  | NC (n=5)                   | 0.9008 | Mann-Whitney <i>U</i> test                                                          |                                     |
|      |  | Sip73-1 (n=5)              | 0.7061 |                                                                                     | P=0.007936507936508<br>vs NC        |
|      |  | Sip73-2 (n=5)              | 0.1460 |                                                                                     | P=0.007936507936508<br>vs NC        |
|      |  | Sip73-3 (n=5)              | 0.0672 |                                                                                     | P=0.007936507936508<br>vs NC        |
| S7 G |  | H/R+NC (n=6)               | 0.8799 | one-way ANOVA<br>analysis followed by<br>Tukey's post-hoc multi-<br>comparison test |                                     |
|      |  | H/R+ASPP1<br>(n=6)         | 0.2010 |                                                                                     | P=6.71988E-10 vs<br>H/R+NC          |
|      |  | H/R+ASPP1+si<br>CTRL (n=6) | 0.8535 |                                                                                     | P=5.49217E-9 vs<br>H/R+NC           |
|      |  | H/R+ASPP1+si<br>p73 (n=6)  | 0.4425 |                                                                                     | P=0.529595747282050<br>vs H/R+ASPP1 |
|      |  |                            |        |                                                                                     | P=1.6802739E-8 vs<br>H/R+NC         |
|      |  |                            |        | P=0.201146220115563<br>vs H/R+ASPP1                                                 |                                     |
|      |  |                            |        | P=0.901961439951775<br>vs H/R+ASPP1+siCTRL                                          |                                     |
| S7 H |  | H/R+NC (n=6)               | 0.7256 | one-way ANOVA<br>analysis followed by<br>Tukey's post-hoc multi-<br>comparison test |                                     |
|      |  | H/R+ASPP1<br>(n=6)         | 0.7135 |                                                                                     | P=1.44896E-10 vs<br>H/R+NC          |
|      |  | H/R+ASPP1+si<br>CTRL (n=6) | 0.1807 |                                                                                     | P=5.71708E-09 vs<br>H/R+NC          |
|      |  | H/R+ASPP1+si<br>p73 (n=6)  | 0.4395 |                                                                                     | P=0.093294084549919<br>vs H/R+ASPP1 |
|      |  |                            |        |                                                                                     | P=2.19465E-09 vs<br>H/R+NC          |
|      |  |                            |        | P=0.270251911961957<br>vs H/R+ASPP1                                                 |                                     |
|      |  |                            |        | P=0.927688529265254<br>vs H/R+ASPP1+siCTRL                                          |                                     |
| S7 I |  | H/R+NC (n=6)               | 0.4002 | one-way ANOVA<br>analysis followed by<br>Tukey's post-hoc multi-<br>comparison test |                                     |
|      |  | H/R+ASPP1<br>(n=6)         | 0.1229 |                                                                                     | P=1.41981E-09 vs<br>H/R+NC          |
|      |  | H/R+ASPP1+si<br>CTRL (n=6) | 0.2016 |                                                                                     | P=6.40089E-09 vs<br>H/R+NC          |
|      |  | H/R+ASPP1+si<br>p73 (n=6)  | 0.2811 |                                                                                     | P=0.769905954 vs<br>H/R+ASPP1       |
|      |  |                            |        | P=1.13906E-09 vs<br>H/R+NC                                                          |                                     |
|      |  |                            |        | P=0.99884115 vs<br>H/R+ASPP1                                                        |                                     |
|      |  |                            |        | P=0.686259519 vs                                                                    |                                     |

|      |  |                         |        |                                                                           |                                         |
|------|--|-------------------------|--------|---------------------------------------------------------------------------|-----------------------------------------|
|      |  |                         |        |                                                                           | H/R+ASPP1+siCTRL                        |
| S7 J |  | H/R+NC (n=6)            | 0.5374 | one-way ANOVA analysis followed by Tukey's post-hoc multi-comparison test |                                         |
|      |  | H/R+ASPP1 (n=6)         | 0.1487 |                                                                           | P=0.001500717080863 vs H/R+NC           |
|      |  | H/R+ASPP1+si CTRL (n=6) | 0.6262 |                                                                           | P=0.001412806251957 vs H/R+NC           |
|      |  | H/R+ASPP1+si p73 (n=6)  | 0.7065 |                                                                           | P=0.001934746317545 vs H/R+ASPP1        |
|      |  |                         |        |                                                                           | P=0.999993118079006 vs H/R+NC           |
|      |  |                         |        |                                                                           | P=0.999489377373111 vs H/R+ASPP1        |
|      |  |                         |        |                                                                           | P=0.999034864743258 vs H/R+ASPP1+siCTRL |
| S8 A |  | NC (n=6)                | 0.3855 | nonpaired 2-tailed Student <i>t</i> test                                  |                                         |
|      |  | siASPP2 (n=6)           | 0.6649 |                                                                           | P=2.32972E-06 vs NC                     |
| S8 B |  | NC (n=6)                | 0.3562 | nonpaired 2-tailed Student <i>t</i> test                                  |                                         |
|      |  | siiASPP (n=6)           | 0.6253 |                                                                           | P=2.25397E-07 vs NC                     |
| S8 C |  | NC (n=6)                | 0.5567 | nonpaired 2-tailed Student <i>t</i> test                                  |                                         |
|      |  | siimportin-β1 (n=6)     | 0.5803 |                                                                           | P=9.50083E-07 vs NC                     |
| S8 D |  | NC (n=6)                | 0.5631 | nonpaired 2-tailed Student <i>t</i> test                                  |                                         |
|      |  | siE2F1 (n=6)            | 0.3920 |                                                                           | P=1.22798E-08 vs NC                     |

Normality test values were analyzed by D'Agostino & Pearson test ( $n \geq 8$ ) and Shapiro-Wilk test ( $n < 8$ ).

**Supplementary Table 8. Detailed statistical analysis information for all main and supplementary figures and tables.**

| Table |           | Groups (Sample size) | Normality test values                    | Statistical analysis                     | P value                   |
|-------|-----------|----------------------|------------------------------------------|------------------------------------------|---------------------------|
| S1    | EF        | WT (n=14)            | 0.1793                                   | nonpaired 2-tailed Student <i>t</i> test |                           |
|       |           | ASPP1(TG) (n=20)     | 0.2993                                   |                                          | P=0.480531939433960 vs WT |
|       | FS        | WT (n=14)            | 0.0379                                   | Mann-Whitney <i>U</i> test               |                           |
|       |           | ASPP1(TG) (n=20)     | 0.3679                                   |                                          | P=0.522479771269560 vs WT |
|       | LVIDd     | WT (n=14)            | 0.1521                                   | Mann-Whitney <i>U</i> test               |                           |
|       |           | ASPP1(TG) (n=20)     | 0.0065                                   |                                          | P=0.344938235413373 vs WT |
| LVIDs | WT (n=14) | 0.3543               | nonpaired 2-tailed Student <i>t</i> test |                                          |                           |
|       | ASPP1(TG) | 0.4092               |                                          | P=0.396070566010893                      |                           |



|                         |       |                          |                                 |                                                                                    |                                                                                    |                             |
|-------------------------|-------|--------------------------|---------------------------------|------------------------------------------------------------------------------------|------------------------------------------------------------------------------------|-----------------------------|
|                         |       | (n=20)                   |                                 |                                                                                    | vs WT                                                                              |                             |
|                         | LVEDV | WT (n=14)                | 0.2083                          | Mann-Whitney <i>U</i> test                                                         |                                                                                    |                             |
|                         |       | ASPP1(TG)<br>(n=20)      | 0.0001                          |                                                                                    | P=0.327372297262329<br>vs WT                                                       |                             |
|                         | LVESV | WT (n=14)                | 0.9505                          | Mann-Whitney <i>U</i> test                                                         |                                                                                    |                             |
|                         |       | ASPP1(TG)<br>(n=20)      | 0.0130                          |                                                                                    | P=0.241248546562209<br>vs WT                                                       |                             |
| S2                      | EF    | WT (n=9)                 | 0.1256                          | nonpaired 2-tailed<br>Student <i>t</i> test                                        |                                                                                    |                             |
|                         |       | ASPP1(KO)<br>(n=12)      | 0.8037                          |                                                                                    | P=0.517412514137118<br>vs WT                                                       |                             |
|                         | FS    | WT (n=9)                 | 0.0803                          | nonpaired 2-tailed<br>Student <i>t</i> test                                        |                                                                                    |                             |
|                         |       | ASPP1(KO)<br>(n=12)      | 0.6661                          |                                                                                    | P=0.385036128965754<br>vs WT                                                       |                             |
|                         | LVIDd | WT (n=9)                 | 0.6133                          | nonpaired 2-tailed<br>Student <i>t</i> test                                        |                                                                                    |                             |
|                         |       | ASPP1(KO)<br>(n=12)      | 0.4343                          |                                                                                    | P=0.652501422547523<br>vs WT                                                       |                             |
|                         | LVIDs | WT (n=9)                 | 0.1598                          | nonpaired 2-tailed<br>Student <i>t</i> test                                        |                                                                                    |                             |
|                         |       | ASPP1(KO)<br>(n=12)      | 0.5917                          |                                                                                    | P=0.404440482462218<br>vs WT                                                       |                             |
|                         | LVEDV | WT (n=9)                 | 0.6090                          | nonpaired 2-tailed<br>Student <i>t</i> test                                        |                                                                                    |                             |
|                         |       | ASPP1(KO)<br>(n=12)      | 0.5397                          |                                                                                    | P=0.639549860162757<br>vs WT                                                       |                             |
|                         | LVESV | WT (n=9)                 | 0.1694                          | nonpaired 2-tailed<br>Student <i>t</i> test                                        |                                                                                    |                             |
|                         |       | ASPP1(KO)<br>(n=12)      | 0.5466                          |                                                                                    | P=0.534055415037592<br>vs WT                                                       |                             |
|                         | S3    | EF                       | WT+Sham<br>(n=9)                | 0.3584                                                                             | two-way ANOVA<br>analysis followed by<br>Tukey's post-hoc<br>multi-comparison test |                             |
|                         |       |                          | ASPP1(TG)+S<br>ham (n=9)        | 0.6918                                                                             |                                                                                    | P=0.995724123 vs<br>WT+Sham |
| WT+I/R (n=9)            |       |                          | 0.4626                          | P=2.86621E-07 vs<br>WT+Sham                                                        |                                                                                    |                             |
|                         |       |                          |                                 | P=1.51667E-07 vs<br>ASPP1(TG)+Sham                                                 |                                                                                    |                             |
| ASPP1(TG)+I/<br>R (n=9) |       |                          | 0.3370                          | P=1.11E-13 vs<br>WT+Sham                                                           |                                                                                    |                             |
|                         |       |                          | P=1.08E-13 vs<br>ASPP1(TG)+Sham |                                                                                    |                                                                                    |                             |
|                         |       |                          | P=1.63415E-07 vs<br>WT+I/R      |                                                                                    |                                                                                    |                             |
| FS                      |       | WT+Sham<br>(n=9)         | 0.2560                          | two-way ANOVA<br>analysis followed by<br>Tukey's post-hoc<br>multi-comparison test |                                                                                    |                             |
|                         |       | ASPP1(TG)+S<br>ham (n=9) | 0.7281                          |                                                                                    | P=0.996340287 vs<br>WT+Sham                                                        |                             |
|                         |       | WT+I/R (n=9)             | 0.4289                          |                                                                                    | P=6.09478E-08 vs<br>WT+Sham                                                        |                             |

|       |                      |        |                                                                           |  |                                 |
|-------|----------------------|--------|---------------------------------------------------------------------------|--|---------------------------------|
|       |                      |        |                                                                           |  | P=3.37548E-08 vs ASPP1(TG)+Sham |
|       | ASPP1(TG)+I/R (n=9)  | 0.2479 |                                                                           |  | P=1.25E-13 vs WT+Sham           |
|       |                      |        |                                                                           |  | P=1.16E-13 vs ASPP1(TG)+Sham    |
|       |                      |        |                                                                           |  | P=2.59946E-06 vs WT+I/R         |
| LVIDd | WT+Sham (n=9)        | 0.0434 | Kruskal Wallis test with FDR (Benjamini-Hochberg method)                  |  |                                 |
|       | ASPP1(TG)+Sham (n=9) | 0.9172 |                                                                           |  | P=0.80552627 vs WT+Sham         |
|       | WT+I/R (n=9)         | 0.9790 |                                                                           |  | P=0.008826852 vs WT+Sham        |
|       |                      |        |                                                                           |  | P=0.004171542 vs ASPP1(TG)+Sham |
|       | ASPP1(TG)+I/R (n=9)  | 0.5032 |                                                                           |  | P=0.004171542 vs WT+Sham        |
|       |                      |        |                                                                           |  | P=0.001863972 vs ASPP1(TG)+Sham |
|       |                      |        |                                                                           |  | P=0.80552627 vs WT+I/R          |
| LVIDs | WT+Sham (n=9)        | 0.6898 | two-way ANOVA analysis followed by Tukey's post-hoc multi-comparison test |  |                                 |
|       | ASPP1(TG)+Sham (n=9) | 0.3695 |                                                                           |  | P=0.972320645 vs WT+Sham        |
|       | WT+I/R (n=9)         | 0.6847 |                                                                           |  | P=1.41875E-06 vs WT+Sham        |
|       |                      |        |                                                                           |  | P=4.16131E-07 vs ASPP1(TG)+Sham |
|       | ASPP1(TG)+I/R (n=9)  | 0.7821 |                                                                           |  | P=2.8659E-11 vs WT+Sham         |
|       |                      |        |                                                                           |  | P=1.0496E-11 vs ASPP1(TG)+Sham  |
|       |                      |        |                                                                           |  | P=0.001339017 vs WT+I/R         |
| LVEDV | WT+Sham (n=9)        | 0.0444 | Kruskal Wallis test with FDR (Benjamini-Hochberg method)                  |  |                                 |
|       | ASPP1(TG)+Sham (n=9) | 0.7407 |                                                                           |  | P=0.81427103 vs WT+Sham         |
|       | WT+I/R (n=9)         | 0.9633 |                                                                           |  | P=0.009147538 vs WT+Sham        |
|       |                      |        |                                                                           |  | P=0.004491451 vs ASPP1(TG)+Sham |
|       | ASPP1(TG)+I/R (n=9)  | 0.1594 |                                                                           |  | P=0.004186141 vs WT+Sham        |

|    |                      |                       |                       |                                                                           |                                                                           |                          |
|----|----------------------|-----------------------|-----------------------|---------------------------------------------------------------------------|---------------------------------------------------------------------------|--------------------------|
|    |                      |                       |                       |                                                                           | P=0.001943696 vs ASPP1(TG)+Sham                                           |                          |
|    |                      |                       |                       |                                                                           | P=0.796952561 vs WT+I/R                                                   |                          |
|    | LVESV                | WT+Sham (n=9)         | 0.6872                | two-way ANOVA analysis followed by Tukey's post-hoc multi-comparison test |                                                                           |                          |
|    |                      | ASPP1(TG)+Sham (n=9)  | 0.1966                |                                                                           | P=0.999135733 vs WT+Sham                                                  |                          |
|    |                      | WT+I/R (n=9)          | 0.5906                |                                                                           | P=3.74868E-05 vs WT+Sham                                                  |                          |
|    |                      | ASPP1(TG)+I/R (n=9)   | 0.8047                |                                                                           | P=2.55036E-05 vs ASPP1(TG)+Sham                                           |                          |
|    |                      |                       |                       |                                                                           | P=9.3604E-11 vs WT+Sham                                                   |                          |
|    |                      |                       |                       |                                                                           | P=6.786E-11 vs ASPP1(TG)+Sham                                             |                          |
|    |                      |                       |                       |                                                                           | P=0.0002187 vs WT+I/R                                                     |                          |
| S4 | EF                   | WT+Sham (n=11)        | 0.6023                | two-way ANOVA analysis followed by Tukey's post-hoc multi-comparison test |                                                                           |                          |
|    |                      | ASPP1(KO)+Sham (n=11) | 0.3526                |                                                                           | P=0.5848123762 vs WT+Sham                                                 |                          |
|    |                      | WT+I/R (n=11)         | 0.7810                |                                                                           | P=6.5373E-9 vs WT+Sham                                                    |                          |
|    |                      | ASPP1(KO)+I/R (n=11)  | 0.4097                |                                                                           | P=1.33244E-10 vs ASPP1(KO)+Sham                                           |                          |
|    |                      |                       |                       |                                                                           | P=0.02838704 vs WT+Sham                                                   |                          |
|    |                      |                       |                       |                                                                           | P=0.000831822 vs ASPP1(KO)+Sham                                           |                          |
|    |                      |                       |                       |                                                                           | P=7.29144E-05 vs WT+I/R                                                   |                          |
|    |                      | FS                    | WT+Sham (n=11)        | 0.4535                                                                    | two-way ANOVA analysis followed by Tukey's post-hoc multi-comparison test |                          |
|    |                      |                       | ASPP1(KO)+Sham (n=11) | 0.3704                                                                    |                                                                           | P=0.338366479 vs WT+Sham |
|    |                      |                       | WT+I/R (n=11)         | 0.8341                                                                    |                                                                           | P=7.6156E-07 vs WT+Sham  |
|    | ASPP1(KO)+I/R (n=11) |                       | 0.3639                | P=3.46549E-09 vs ASPP1(KO)+Sham                                           |                                                                           |                          |
|    |                      |                       |                       |                                                                           | P=0.050276088 vs WT+Sham                                                  |                          |
|    |                      |                       |                       |                                                                           | P=0.00047368 vs ASPP1(KO)+Sham                                            |                          |
|    |                      |                       |                       |                                                                           | P=0.003278664 vs WT+I/R                                                   |                          |

|       |                       |                                 |                                                                           |                                                                           |                                 |
|-------|-----------------------|---------------------------------|---------------------------------------------------------------------------|---------------------------------------------------------------------------|---------------------------------|
|       | LVIDd                 | WT+Sham (n=11)                  | 0.0005                                                                    | Kruskal Wallis test with FDR (Benjamini-Hochberg method)                  |                                 |
|       |                       | ASPP1(KO)+Sham (n=11)           | 0.0127                                                                    |                                                                           | P=0.517314202 vs WT+Sham        |
|       |                       | WT+I/R (n=11)                   | 0.1982                                                                    |                                                                           | P=0.000187324 vs WT+Sham        |
|       |                       | ASPP1(KO)+I/R (n=11)            | 0.6072                                                                    |                                                                           | P=0.002014853 vs ASPP1(KO)+Sham |
|       |                       |                                 | P=0.973511376 vs WT+Sham                                                  |                                                                           |                                 |
|       |                       |                                 | P=0.496064063 vs ASPP1(KO)+Sham                                           |                                                                           |                                 |
|       |                       |                                 | P=0.00016408 vs WT+I/R                                                    |                                                                           |                                 |
|       | LVIDs                 | WT+Sham (n=11)                  | 0.2730                                                                    | two-way ANOVA analysis followed by Tukey's post-hoc multi-comparison test |                                 |
|       |                       | ASPP1(KO)+Sham (n=11)           | 0.5167                                                                    |                                                                           | P=0.913411653 vs WT+Sham        |
|       |                       | WT+I/R (n=11)                   | 0.7946                                                                    |                                                                           | P=3.65627E-08 vs WT+Sham        |
|       |                       | ASPP1(KO)+I/R (n=11)            | 0.7598                                                                    |                                                                           | P=4.66246E-09 vs ASPP1(KO)+Sham |
|       |                       |                                 | P=0.262729716 vs WT+Sham                                                  |                                                                           |                                 |
|       |                       | P=0.073397222 vs ASPP1(KO)+Sham |                                                                           |                                                                           |                                 |
|       |                       | P=1.42267E-05 vs WT+I/R         |                                                                           |                                                                           |                                 |
| LVEDV | WT+Sham (n=11)        | 0.0020                          | Kruskal Wallis test with FDR (Benjamini-Hochberg method)                  |                                                                           |                                 |
|       | ASPP1(KO)+Sham (n=11) | 0.0770                          |                                                                           | P=0.522728744 vs WT+Sham                                                  |                                 |
|       | WT+I/R (n=11)         | 0.1889                          |                                                                           | P=0.000193802 vs WT+Sham                                                  |                                 |
|       | ASPP1(KO)+I/R (n=11)  | 0.7936                          |                                                                           | P=0.00201633 vs ASPP1(KO)+Sham                                            |                                 |
|       |                       | P=0.960278985 vs WT+Sham        |                                                                           |                                                                           |                                 |
|       |                       | P=0.490855815 vs ASPP1(KO)+Sham |                                                                           |                                                                           |                                 |
|       |                       | P=0.000158879 vs WT+I/R         |                                                                           |                                                                           |                                 |
| LVESV | WT+Sham (n=11)        | 0.6914                          | two-way ANOVA analysis followed by Tukey's post-hoc multi-comparison test |                                                                           |                                 |
|       | ASPP1(KO)+Sham (n=11) | 0.7109                          |                                                                           | P=0.995742331 vs WT+Sham                                                  |                                 |

|                                    |       |                                        |                                   |                                                                                    |                                               |
|------------------------------------|-------|----------------------------------------|-----------------------------------|------------------------------------------------------------------------------------|-----------------------------------------------|
|                                    |       | WT+I/R<br>(n=11)                       | 0.8212                            |                                                                                    | P=3.3851E-10 vs<br>WT+Sham                    |
|                                    |       | ASPP1(KO)+I<br>/R (n=11)               | 0.9910                            |                                                                                    | P=1.70539E-10 vs<br>ASPP1(KO)+Sham            |
|                                    |       |                                        |                                   |                                                                                    | P=0.280370017 vs<br>WT+Sham                   |
|                                    |       |                                        |                                   |                                                                                    | P=0.188776896 vs<br>ASPP1(KO)+Sham            |
|                                    |       |                                        |                                   |                                                                                    | P=9.78295E-08 vs<br>WT+I/R                    |
| S5                                 | EF    | WT+I/R (n=7)                           | 0.0964                            | one-way ANOVA<br>analysis followed by<br>Tukey's post-hoc<br>multi-comparison test |                                               |
|                                    |       | ASPP1(TG)+I/<br>R (n=7)                | 0.4951                            |                                                                                    | P=7.26293E-09 vs<br>WT+I/R                    |
|                                    |       | ASPP1(TG)+I/<br>R+AAV9-NC<br>(n=7)     | 0.2942                            |                                                                                    | P=2.74458E-09 vs<br>WT+I/R                    |
|                                    |       | ASPP1(TG)+I/<br>R+AAV9-<br>shp53 (n=7) | 0.2942                            |                                                                                    | P=0.96010774 vs<br>ASPP1(TG)+I/R              |
|                                    |       |                                        |                                   |                                                                                    | P=0.808847929 vs<br>WT+I/R                    |
|                                    |       |                                        |                                   |                                                                                    | P=1.2712E-09 vs<br>ASPP1(TG)+I/R              |
|                                    |       |                                        |                                   |                                                                                    | P=5.06677E-10 vs<br>ASPP1(TG)+I/R+AAV<br>9-NC |
|                                    | FS    | WT+I/R (n=7)                           | 0.1602                            | one-way ANOVA<br>analysis followed by<br>Tukey's post-hoc<br>multi-comparison test |                                               |
|                                    |       | ASPP1(TG)+I/<br>R (n=7)                | 0.3785                            |                                                                                    | P=7.27796E-09 vs<br>WT+I/R                    |
|                                    |       | ASPP1(TG)+I/<br>R+AAV9-NC<br>(n=7)     | 0.3644                            |                                                                                    | P=3.16924E-09 vs<br>WT+I/R                    |
|                                    |       | ASPP1(TG)+I/<br>R+AAV9-<br>shp53 (n=7) | 0.4521                            |                                                                                    | P=0.974620984 vs<br>ASPP1(TG)+I/R             |
|                                    |       |                                        |                                   |                                                                                    | P=0.737030875 vs<br>WT+I/R                    |
|                                    |       |                                        |                                   |                                                                                    | P=9.9234E-10 vs<br>ASPP1(TG)+I/R              |
|                                    |       |                                        |                                   |                                                                                    | P=4.55216E-10 vs<br>ASPP1(TG)+I/R+AAV<br>9-NC |
|                                    | LVIDd | WT+I/R (n=7)                           | 0.0094                            | Kruskal Wallis test<br>with FDR (Benjamini-<br>Hochberg method)                    |                                               |
|                                    |       | ASPP1(TG)+I/<br>R (n=7)                | 0.8406                            |                                                                                    | P=0.110893751 vs<br>WT+I/R                    |
| ASPP1(TG)+I/<br>R+AAV9-NC<br>(n=7) |       | 0.0397                                 | P=0.054916854 vs<br>WT+I/R        |                                                                                    |                                               |
| ASPP1(TG)+I/<br>R+AAV9-            |       | 0.8943                                 | P=0.744920237 vs<br>ASPP1(TG)+I/R |                                                                                    |                                               |
|                                    |       |                                        |                                   | P=0.794651096 vs<br>WT+I/R                                                         |                                               |

|       |                                |             |                                                                           |                                |                                        |
|-------|--------------------------------|-------------|---------------------------------------------------------------------------|--------------------------------|----------------------------------------|
|       |                                | shp53 (n=7) |                                                                           |                                | P=0.182232341 vs ASPP1(TG)+I/R         |
|       |                                |             |                                                                           |                                | P=0.097063866 vs ASPP1(TG)+I/R+AAV9-NC |
| LVIDs | WT+I/R (n=7)                   | 0.4686      | two-way ANOVA analysis followed by Tukey's post-hoc multi-comparison test |                                |                                        |
|       | ASPP1(TG)+I/R (n=7)            | 0.3149      |                                                                           | P=2.08833E-05 vs WT+I/R        |                                        |
|       | ASPP1(TG)+I/R+AAV9-NC (n=7)    | 0.5595      |                                                                           | P=3.86787E-06 vs WT+I/R        |                                        |
|       | ASPP1(TG)+I/R+AAV9-shp53 (n=7) | 0.8664      |                                                                           | P=0.896138371 vs ASPP1(TG)+I/R |                                        |
| LVEDV | WT+I/R (n=7)                   | 0.0160      | Kruskal Wallis test with FDR (Benjamini-Hochberg method)                  |                                |                                        |
|       | ASPP1(TG)+I/R (n=7)            | 0.8462      |                                                                           | P=0.122457658 vs WT+I/R        |                                        |
|       | ASPP1(TG)+I/R+AAV9-NC (n=7)    | 0.0385      |                                                                           | P=0.059299781 vs WT+I/R        |                                        |
|       | ASPP1(TG)+I/R+AAV9-shp53 (n=7) | 0.9036      |                                                                           | P=0.732783996 vs ASPP1(TG)+I/R |                                        |
| LVESV | WT+I/R (n=7)                   | 0.5922      | two-way ANOVA analysis followed by Tukey's post-hoc multi-comparison test |                                |                                        |
|       | ASPP1(TG)+I/R (n=7)            | 0.2667      |                                                                           | P=6.07924E-05 vs WT+I/R        |                                        |
|       | ASPP1(TG)+I/R+AAV9-NC (n=7)    | 0.4642      |                                                                           | P=9.46072E-06 vs WT+I/R        |                                        |
|       | ASPP1(TG)+I/R+AAV9-shp53 (n=7) | 0.8841      |                                                                           | P=0.871480293 vs ASPP1(TG)+I/R |                                        |
|       |                                |             |                                                                           |                                | P=0.999885245 vs WT+I/R                |
|       |                                |             |                                                                           |                                | P=5.14096E-05 vs ASPP1(TG)+I/R         |
|       |                                |             |                                                                           |                                | P=8.03653E-06 vs ASPP1(TG)+I/R+AAV9-NC |

Normality test values were analyzed by D'Agostino & Pearson test ( $n \geq 8$ ) and Shapiro-Wilk test ( $n < 8$ ).
