# Supplementary material for: Interdependent Nuclear Co-Trafficking of ASPP1 and p53 Aggravates Cardiac Ischemia/Reperfusion Injury
Source: PubMed Central journal article supplement — Circ Res. 2022 Dec 30;132(2):208–22. doi: 10.1161/CIRCRESAHA.122.321153 (PMC9855749; doi:10.1161/circresaha.122.321153), 2022-12-30
Supplement: res-132-208-s003.pdf [file res-132-208-s003.pdf]

## Major resources table

### Antibodies

| Target antigen | Vendor or Source          | Catalog #  | Working concentration       | Persistent ID / URL                                                                                                                                                                                                                                                                                                                                                                                                                                                                                         |
|----------------|---------------------------|------------|-----------------------------|-------------------------------------------------------------------------------------------------------------------------------------------------------------------------------------------------------------------------------------------------------------------------------------------------------------------------------------------------------------------------------------------------------------------------------------------------------------------------------------------------------------|
| ASPP1          | Sigma                     | A4355      | WB (1:1000)                 | <a href="https://www.sigmaaldrich.cn/CN/zh/product/sigma/a4355">https://www.sigmaaldrich.cn/CN/zh/product/sigma/a4355</a>                                                                                                                                                                                                                                                                                                                                                                                   |
| ASPP1          | Sigma-Aldrich             | HPA006394  | IF (1:100)<br>Co-IP (10 ug) | <a href="https://www.sigmaaldrich.cn/CN/zh/product/sigma/hpa006394">https://www.sigmaaldrich.cn/CN/zh/product/sigma/hpa006394</a>                                                                                                                                                                                                                                                                                                                                                                           |
| p53            | Cell Signaling Technology | 2524S      | WB (1:1000)                 | <a href="https://www.cellsignal.cn/products/primary-antibodies/p53-1c12-mouse-mab/2524;jsessionid=ptbl4bpk1srf3-oqbxof2zcfipbdero1khikryxw.prod_store04?N=4294956287&amp;Ntt=2524s&amp;_requestid=175196&amp;fromPage=plp&amp;site-search-type=Products">https://www.cellsignal.cn/products/primary-antibodies/p53-1c12-mouse-mab/2524;jsessionid=ptbl4bpk1srf3-oqbxof2zcfipbdero1khikryxw.prod_store04?N=4294956287&amp;Ntt=2524s&amp;_requestid=175196&amp;fromPage=plp&amp;site-search-type=Products</a> |
| p53            | ABclonal                  | A19585     | Co-IP (10 µg)               | <a href="https://abclonal.com.cn/catalog/A19585">https://abclonal.com.cn/catalog/A19585</a>                                                                                                                                                                                                                                                                                                                                                                                                                 |
| p53            | R&D                       | AF1355     | IF (1:100)                  | <a href="https://www.rndsystems.com/cn/products/human-mouse-rat-p53-antibody_af1355">https://www.rndsystems.com/cn/products/human-mouse-rat-p53-antibody_af1355</a>                                                                                                                                                                                                                                                                                                                                         |
| Bcl2           | Cell Signaling Technology | 3498S      | WB (1:1000)                 | <a href="https://www.cellsignal.cn/products/primary-antibodies/bcl-2-d17c4-rabbit-mab-mouse-preferred/3498?site-search-type=Products&amp;N=4294956287&amp;Ntt=3498s&amp;fromPage=plp&amp;_requestid=175552">https://www.cellsignal.cn/products/primary-antibodies/bcl-2-d17c4-rabbit-mab-mouse-preferred/3498?site-search-type=Products&amp;N=4294956287&amp;Ntt=3498s&amp;fromPage=plp&amp;_requestid=175552</a>                                                                                           |
| Bax            | Proteintech               | 60267-1-Ig | WB (1:5000)                 | <a href="https://www.ptgen.com/products/BAX-Antibody-60267-1-Ig.htm">https://www.ptgen.com/products/BAX-Antibody-60267-1-Ig.htm</a>                                                                                                                                                                                                                                                                                                                                                                         |

|                |                           |            |               |                                                                                                                                                                                                                                                                                                                                                                                                                                                                                                       |
|----------------|---------------------------|------------|---------------|-------------------------------------------------------------------------------------------------------------------------------------------------------------------------------------------------------------------------------------------------------------------------------------------------------------------------------------------------------------------------------------------------------------------------------------------------------------------------------------------------------|
| E2F1           | ABclonal                  | A2067      | WB (1:1000)   | <a href="https://abclonal.com.cn/catalog/A2067">https://abclonal.com.cn/catalog/A2067</a>                                                                                                                                                                                                                                                                                                                                                                                                             |
| Flag tag       | Cell Signaling Technology | 8146S      | WB/IF (1:500) | <a href="https://www.cellsignal.cn/products/primary-antibodies/dykdddk-tag-9a3-mouse-mab-binds-to-same-epitope-as-sigma-s-anti-flag-m2-antibody/8146?site-search-type=Products&amp;N=4294956287&amp;Ntt=8146s&amp;fromPage=plp&amp;_requestid=175860">https://www.cellsignal.cn/products/primary-antibodies/dykdddk-tag-9a3-mouse-mab-binds-to-same-epitope-as-sigma-s-anti-flag-m2-antibody/8146?site-search-type=Products&amp;N=4294956287&amp;Ntt=8146s&amp;fromPage=plp&amp;_requestid=175860</a> |
| p63            | ABclonal                  | A19652     | WB (1:500)    | <a href="https://abclonal.com.cn/catalog/A19652">https://abclonal.com.cn/catalog/A19652</a>                                                                                                                                                                                                                                                                                                                                                                                                           |
| p73            | ABclonal                  | A2670      | WB (1:500)    | <a href="https://abclonal.com.cn/catalog/A2670">https://abclonal.com.cn/catalog/A2670</a>                                                                                                                                                                                                                                                                                                                                                                                                             |
| $\beta$ -actin | Proteintech               | 66009-1-Ig | WB (1:500)    | <a href="https://www.ptgc.cn/products/Pan-Actin-Antibody-66009-1-Ig.htm">https://www.ptgc.cn/products/Pan-Actin-Antibody-66009-1-Ig.htm</a>                                                                                                                                                                                                                                                                                                                                                           |
| ASPP2          | Santa                     | sc-53861   | IF (1:50)     | <a href="https://www.scbt.com/p/53bp2-antibody-dx54-10?requestFrom=search">https://www.scbt.com/p/53bp2-antibody-dx54-10?requestFrom=search</a>                                                                                                                                                                                                                                                                                                                                                       |
| iASPP          | Santa                     | sc-398566  | IF (1:50)     | <a href="https://www.scbt.com/p/iaspp-antibody-a-2?requestFrom=search">https://www.scbt.com/p/iaspp-antibody-a-2?requestFrom=search</a>                                                                                                                                                                                                                                                                                                                                                               |
| p63            | Santa                     | sc-25268   | IF (1:50)     | <a href="https://www.scbt.com/p/p63-antibody-d-9?requestFrom=search">https://www.scbt.com/p/p63-antibody-d-9?requestFrom=search</a>                                                                                                                                                                                                                                                                                                                                                                   |
| p73            | Santa                     | sc-56190   | IF (1:50)     | <a href="https://www.scbt.com/p/p73-antibody-5b1288?requestFrom=search">https://www.scbt.com/p/p73-antibody-5b1288?requestFrom=search</a>                                                                                                                                                                                                                                                                                                                                                             |

## Animals (in vivo studies)

| Species | Vendor or Source                                                             | Background Strain | Sex  | Persistent ID/URL                                                                                                                       |
|---------|------------------------------------------------------------------------------|-------------------|------|-----------------------------------------------------------------------------------------------------------------------------------------|
| mouse   | Cyagen Biosciences                                                           | ASPP1(TG) C57BL/6 | male | <a href="https://www.cyagen.com/cn/zh-cn/?bd_vid=10004428659886214057">https://www.cyagen.com/cn/zh-cn/?bd_vid=10004428659886214057</a> |
| mouse   | Cyagen Biosciences                                                           | ASPP1(KO) C57BL/6 | male | <a href="https://www.cyagen.com/cn/zh-cn/?bd_vid=10004428659886214057">https://www.cyagen.com/cn/zh-cn/?bd_vid=10004428659886214057</a> |
| mouse   | Animal Center of the Second Affiliated Hospital of Harbin Medical University | C57BL/6           | male | N/A                                                                                                                                     |

## DNA/cDNA Clones

| Clone Name | Sequence                | Source /Repository | Persistent ID / URL                                                                                                                                                                                                                                               |
|------------|-------------------------|--------------------|-------------------------------------------------------------------------------------------------------------------------------------------------------------------------------------------------------------------------------------------------------------------|
| ASPP1      | NM_011625               | NCBI               | <a href="https://www.ncbi.nlm.nih.gov/nucleotide/NM_011625.1?report=genbank&amp;log\$=nucltop&amp;blast_rank=1&amp;RID=RBS49SR0016">https://www.ncbi.nlm.nih.gov/nucleotide/NM_011625.1?report=genbank&amp;log\$=nucltop&amp;blast_rank=1&amp;RID=RBS49SR0016</a> |
| p53        | NM_011640.3             | NCBI               | <a href="https://www.ncbi.nlm.nih.gov/nucleotide/NM_011640.3?report=genbank&amp;log\$=nucltop&amp;blast_rank=5&amp;RID=RBSBN3XS016">https://www.ncbi.nlm.nih.gov/nucleotide/NM_011640.3?report=genbank&amp;log\$=nucltop&amp;blast_rank=5&amp;RID=RBSBN3XS016</a> |
| p53-NT     | NM_011640.3 (158-1021)  | NCBI               | <a href="https://www.ncbi.nlm.nih.gov/nucleotide/NM_011640.3?report=genbank&amp;log\$=nucltop&amp;blast_rank=5&amp;RID=RBSBN3XS016">https://www.ncbi.nlm.nih.gov/nucleotide/NM_011640.3?report=genbank&amp;log\$=nucltop&amp;blast_rank=5&amp;RID=RBSBN3XS016</a> |
| p53-CT     | NM_011640.3 (1085-1249) | NCBI               | <a href="https://www.ncbi.nlm.nih.gov/nucleotide/NM_011640.3?report=genbank&amp;log\$=nucltop&amp;blast_rank=5&amp;RID=RBSBN3XS016">https://www.ncbi.nlm.nih.gov/nucleotide/NM_011640.3?report=genbank&amp;log\$=nucltop&amp;blast_rank=5&amp;RID=RBSBN3XS016</a> |

## Others

| Description | Vendor or Source | Catalog # | Persistent ID/URL                                                                             |
|-------------|------------------|-----------|-----------------------------------------------------------------------------------------------|
| 2,3,5-      | Solarbio         | T8170     | <a href="https://www.solarbio.com/goods-496.html">https://www.solarbio.com/goods-496.html</a> |

|                                                  |                           |             |                                                                                                                                                                                                                                                                                                                                                                                                 |
|--------------------------------------------------|---------------------------|-------------|-------------------------------------------------------------------------------------------------------------------------------------------------------------------------------------------------------------------------------------------------------------------------------------------------------------------------------------------------------------------------------------------------|
| triphenyltetrazolium chloride                    |                           |             |                                                                                                                                                                                                                                                                                                                                                                                                 |
| Mouse CKMB Elisa Kit                             | Elabscience               | E-EL-M0355C | <a href="https://www.elabscience.cn/p-mouse_ckmb_creatine_kinase_mb_isoenzyme_elisa_kit-48588.html">https://www.elabscience.cn/p-mouse_ckmb_creatine_kinase_mb_isoenzyme_elisa_kit-48588.html</a>                                                                                                                                                                                               |
| Lipofectamine™ 2000 reagent                      | Invitrogen                | 11668019    | <a href="https://www.thermofisher.cn/order/catalog/product/11668019?SID=srch-srp-11668019">https://www.thermofisher.cn/order/catalog/product/11668019?SID=srch-srp-11668019</a>                                                                                                                                                                                                                 |
| X-treme GENE siRNA Transfection Reagent          | Roche                     | 4476115001  | <a href="https://www.sigmaaldrich.cn/CN/zh/product/roche/sitranro">https://www.sigmaaldrich.cn/CN/zh/product/roche/sitranro</a>                                                                                                                                                                                                                                                                 |
| LDH Detection Kit                                | Nanjing Jiancheng         | A020-1-2    | <a href="http://www.njjcbio.com/products.asp?id=322">http://www.njjcbio.com/products.asp?id=322</a>                                                                                                                                                                                                                                                                                             |
| In Situ Cell Death Detection Kit                 | Roche                     | 11684817910 | <a href="https://www.sigmaaldrich.cn/CN/zh/product/roche/11684817910">https://www.sigmaaldrich.cn/CN/zh/product/roche/11684817910</a>                                                                                                                                                                                                                                                           |
| Mitochondrial Membrane Potential Assay Kit       | Beyotime                  | C2006       | <a href="https://www.beyotime.com/product/C2006.htm">https://www.beyotime.com/product/C2006.htm</a>                                                                                                                                                                                                                                                                                             |
| Caspase-3 activity assay Kit ( <i>in vivo</i> )  | Abcam                     | ab39383     | <a href="https://www.abcam.cn/caspase-3-assay-kit-fluorometric-ab39383.html">https://www.abcam.cn/caspase-3-assay-kit-fluorometric-ab39383.html</a>                                                                                                                                                                                                                                             |
| Caspase-3 activity assay kit ( <i>in vitro</i> ) | Cell Signaling Technology | 5723        | <a href="https://www.cellsignal.cn/products/cellular-assay-kits/caspase-3-activity-assay-kit/5723?site-search-type=Products&amp;N=4294956287&amp;Ntt=5723&amp;fromPage=plp&amp;_requestid=2073696">https://www.cellsignal.cn/products/cellular-assay-kits/caspase-3-activity-assay-kit/5723?site-search-type=Products&amp;N=4294956287&amp;Ntt=5723&amp;fromPage=plp&amp;_requestid=2073696</a> |
| BCA Protein Assay Kit                            | Beyotime                  | P0010       | <a href="https://www.beyotime.com/product/P0010.htm">https://www.beyotime.com/product/P0010.htm</a>                                                                                                                                                                                                                                                                                             |
| Pierce™ CO-Immunoprecipitation Kit               | Thermo fisher             | 26149       | <a href="https://www.thermofisher.cn/order/catalog/product/26149?SID=srch-srp-26149">https://www.thermofisher.cn/order/catalog/product/26149?SID=srch-srp-26149</a>                                                                                                                                                                                                                             |
| TRIzol reagent                                   | Invitrogen                | 15596026    | <a href="https://www.thermofisher.cn/order/catalog/product/15596026?SID=srch-srp-15596026">https://www.thermofisher.cn/order/catalog/product/15596026?SID=srch-srp-15596026</a>                                                                                                                                                                                                                 |
| TransScript® All-                                | TransGen                  | AT341-01    | <a href="https://www.transgen.com.cn/rt_pcr/927.html">https://www.transgen.com.cn/rt_pcr/927.html</a>                                                                                                                                                                                                                                                                                           |

|                                                      |                  |          |                                                                                                     |
|------------------------------------------------------|------------------|----------|-----------------------------------------------------------------------------------------------------|
| in-One First-Strand cDNA Synthesis SuperMix for qPCR | Biotech          |          |                                                                                                     |
| TransStart® Top Green qPCR SuperMix                  | TransGen Biotech | AQ131-04 | <a href="https://www.transgen.com.cn/qpcr/1004.html">https://www.transgen.com.cn/qpcr/1004.html</a> |
